# Supplementary material for: Quaternary ammonium salts based on caprylic acid as antimicrobial and surface-active agents
Source: Royal Society of Chemistry journal article supplement (doi:10.1039/d3ra07127h), 2023-01-01
Supplement: d3ra07127h1.pdf [file d3ra07127h1.pdf]

# Quaternary ammonium salts based on caprylic acid as antimicrobial and surface-active agents

*Marta Wojcieszak<sup>a</sup>, Anna Syguda<sup>a</sup>, Maciej Karolak<sup>b</sup>, Łukasz Pałkowski<sup>b</sup>,  
Katarzyna Materna<sup>a,\*</sup>*

<sup>a</sup> Poznan University of Technology, Faculty of Chemical Technology, Berdychowo 4, 60-965, Poznan, Poland.

<sup>b</sup> Department of Pharmaceutical Technology, Faculty of Pharmacy, Nicolaus Copernicus University, Jurasza 2, 85-089 Bydgoszcz, Poland.

\* corresponding author: e-mail: [katarzyna.materna@put.poznan.pl](mailto:katarzyna.materna@put.poznan.pl)

## List of tables

|                                                                                                                                                                                               |    |
|-----------------------------------------------------------------------------------------------------------------------------------------------------------------------------------------------|----|
| <b>Table S1.</b> Chemical shifts ( $\delta$ ) and coupling constants ( $J$ ) values in $^1\text{H}$ NMR spectra for aminoamide and aminoester based on caprylic acid ( $\text{CDCl}_3$ )..... | 5  |
| <b>Table S2.</b> Chemical shift ( $\delta$ ) values in $^{13}\text{C}$ NMR spectra for aminoamide and aminoester based on caprylic acid ( $\text{CDCl}_3$ ). .....                            | 6  |
| <b>Table S3.</b> Chemical shifts ( $\delta$ ) and coupling constants ( $J$ ) values in $^1\text{H}$ NMR spectra for amidequats based on caprylic acid ( $\text{CDCl}_3$ ). .....              | 7  |
| <b>Table S4.</b> Chemical shift ( $\delta$ ) values in $^{13}\text{C}$ NMR spectra for amidequats based on caprylic acid ( $\text{CDCl}_3$ ).....                                             | 8  |
| <b>Table S5.</b> Chemical shifts ( $\delta$ ) and coupling constants ( $J$ ) values in $^1\text{H}$ NMR spectra for esterquats based on caprylic acid ( $\text{CDCl}_3$ ). .....              | 9  |
| <b>Table S6.</b> Chemical shift ( $\delta$ ) values in $^{13}\text{C}$ NMR spectra for esterquats based on caprylic acid ( $\text{CDCl}_3$ ). .....                                           | 10 |

## List of figures

|                                                                                                                             |    |
|-----------------------------------------------------------------------------------------------------------------------------|----|
| <b>Fig. S1.</b> $^1\text{H}$ NMR spectrum of <i>N</i> -[(2-dimethylamino)ethyl]octanamide. ....                             | 11 |
| <b>Fig. S2.</b> $^{13}\text{C}$ NMR spectrum of <i>N</i> -[(2-dimethylamino)ethyl]octanamide. ....                          | 12 |
| <b>Fig. S3.</b> $^1\text{H}$ NMR spectrum of (2-dimethylamino)ethyl octanate. ....                                          | 13 |
| <b>Fig. S4.</b> $^{13}\text{C}$ NMR spectrum of (2-dimethylamino)ethyl octanate. ....                                       | 14 |
| <b>Fig. S5.</b> $^1\text{H}$ NMR spectrum of dimethyl- <i>N</i> -[(2-octanamido)ethyl]octylammonium bromide (AC8). .....    | 15 |
| <b>Fig. S6.</b> $^{13}\text{C}$ NMR spectrum of dimethyl- <i>N</i> -[(2-octanamido)ethyl]octylammonium bromide (AC8). ..... | 16 |
| <b>Fig. S7.</b> $^1\text{H}$ NMR spectrum of dimethylnonyl- <i>N</i> -[(2-octanamido)ethyl]ammonium bromide (AC9). .....    | 17 |
| <b>Fig. S8.</b> $^{13}\text{C}$ NMR spectrum of dimethylnonyl- <i>N</i> -[(2-octanamido)ethyl]ammonium bromide (AC9). ..... | 18 |
| <b>Fig. S9.</b> $^1\text{H}$ NMR spectrum of decyldimethyl- <i>N</i> -[(2-octanamido)ethyl]ammonium bromide (AC10). .....   | 19 |

|                                                                                                                              |    |
|------------------------------------------------------------------------------------------------------------------------------|----|
| <b>Fig. S10.</b> <sup>13</sup> C NMR spectrum of decyldimethyl- <i>N</i> -[(2-octanamido)ethyl]ammonium bromide (AC10).      | 20 |
| <b>Fig. S11.</b> <sup>1</sup> H NMR spectrum of dimethyl- <i>N</i> -[(2-octanamido)ethyl]undecylammonium bromide (AC11).     | 21 |
| <b>Fig. S12.</b> <sup>13</sup> C NMR spectrum of dimethyl- <i>N</i> -[(2-octanamido)ethyl]undecylammonium bromide (AC11).    | 22 |
| <b>Fig. S13.</b> <sup>1</sup> H NMR spectrum of dodecyldimethyl- <i>N</i> -[(2-octanamido)ethyl]ammonium bromide (AC12).     | 23 |
| <b>Fig. S14.</b> <sup>13</sup> C NMR spectrum of dodecyldimethyl- <i>N</i> -[(2-octanamido)ethyl]ammonium bromide (AC12).    | 24 |
| <b>Fig. S15.</b> <sup>1</sup> H NMR spectrum of dimethyl- <i>N</i> -[(2-octanamido)ethyl]tetradecylammonium bromide (AC14).  | 25 |
| <b>Fig. S16.</b> <sup>13</sup> C NMR spectrum of dimethyl- <i>N</i> -[(2-octanamido)ethyl]tetradecylammonium bromide (AC14). | 26 |
| <b>Fig. S17.</b> <sup>1</sup> H NMR spectrum of hexadecyldimethyl- <i>N</i> -[(2-octanamido)ethyl]ammonium bromide (AC16).   | 27 |
| <b>Fig. S18.</b> <sup>13</sup> C NMR spectrum of hexadecyldimethyl- <i>N</i> -[(2-octanamido)ethyl]ammonium bromide (AC16).  | 28 |
| <b>Fig. S19.</b> <sup>1</sup> H NMR spectrum of dimethyl-2-octanoyloxyethyloctylammonium bromide (EC8).                      | 29 |
| <b>Fig. S20.</b> <sup>13</sup> C NMR spectrum of dimethyl-2-octanoyloxyethyloctylammonium bromide (EC8).                     | 30 |
| <b>Fig. S21.</b> <sup>1</sup> H NMR spectrum of dimethylnonyl-2-octanoyloxyethylammonium bromide (EC9).                      | 31 |
| <b>Fig. S22.</b> <sup>13</sup> C NMR spectrum of dimethylnonyl-2-octanoyloxyethylammonium bromide (EC9).                     | 32 |
| <b>Fig. S23.</b> <sup>1</sup> H NMR spectrum of decyldimethyl-2-octanoyloxyethylammonium bromide (EC10).                     | 33 |
| <b>Fig. S24.</b> <sup>13</sup> C NMR spectrum of decyldimethyl-2-octanoyloxyethylammonium bromide (EC10).                    | 34 |
| <b>Fig. S25.</b> <sup>1</sup> H NMR spectrum of dimethyl-2-octanoyloxyethylundecylammonium bromide (EC11).                   | 35 |

|                                                                                                                       |    |
|-----------------------------------------------------------------------------------------------------------------------|----|
| <b>Fig. S26.</b> $^{13}\text{C}$ NMR spectrum of dimethyl-2-octanoyloxyethylundecylammonium bromide<br>(EC11).....    | 36 |
| <b>Fig. S27.</b> $^1\text{H}$ NMR spectrum of dodecyldimethyl-2-octanoyloxyethylammonium bromide<br>(EC12).....       | 37 |
| <b>Fig. S28.</b> $^{13}\text{C}$ NMR spectrum of dodecyldimethyl-2-octanoyloxyethylammonium bromide<br>(EC12).....    | 38 |
| <b>Fig. S29.</b> $^1\text{H}$ NMR spectrum of dimethyl-2-octanoyloxyethyltetradecylammonium bromide<br>(EC14).....    | 39 |
| <b>Fig. S30.</b> $^{13}\text{C}$ NMR spectrum of dimethyl-2-octanoyloxyethyltetradecylammonium bromide<br>(EC14)..... | 40 |
| <b>Fig. S31.</b> $^1\text{H}$ NMR spectrum of hexadecyldimethyl-2-octanoyloxyethylammonium bromide<br>(EC16).....     | 41 |
| <b>Fig. S32.</b> $^{13}\text{C}$ NMR spectrum of hexadecyldimethyl-2-octanoyloxyethylammonium bromide<br>(EC16).....  | 42 |
| <b>Fig. S33.</b> Effect of the elongation of alkyl chain on the CMC of amidequats and esterquats....                  | 43 |

**Table S1. Chemical shifts ( $\delta$ ) and coupling constants ( $J$ ) values in  $^1\text{H}$  NMR spectra for aminoamide and aminoester based on caprylic acid ( $\text{CDCl}_3$ ).**

| Protons  | Number of protons | Multiplicity of the signal | 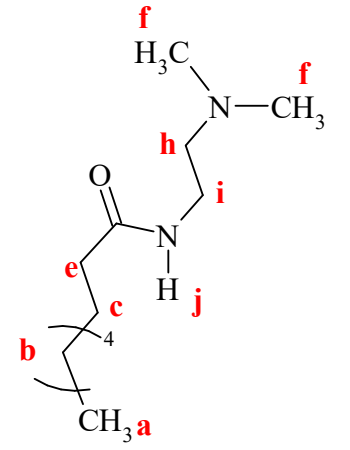 |          |  |          |
|----------|-------------------|----------------------------|-----------------------------------------------------------------------------------|----------|-------------------------------------------------------------------------------------|----------|
|          |                   |                            | $\delta$ (ppm)                                                                    | $J$ (Hz) | $\delta$ (ppm)                                                                      | $J$ (Hz) |
| <b>a</b> | 3H                | triplet                    | 0.82                                                                              | 6.6      | 0.87                                                                                | 6.8      |
| <b>b</b> | 2nH               | multiplet                  | 1.24                                                                              | -        | 1.27                                                                                | -        |
| <b>c</b> | 2H                | quintet                    | 1.57                                                                              | 7.0      | 1.61                                                                                | 7.0      |
| <b>e</b> | 2H                | triplet                    | 2.12                                                                              | 7.7      | 2.31                                                                                | 7.5      |
| <b>f</b> | 6H                | singlet                    | 2.19                                                                              | -        | 2.27                                                                                | -        |
| <b>h</b> | 2H                | triplet                    | 2.37                                                                              | 6.0      | 2.55                                                                                | 5.7      |
| <b>i</b> | 2H                | quartet/<br>triplet        | 3.28<br>(quartet)                                                                 | 5.7      | 4.16 (triplet)                                                                      | 5.7      |
| <b>j</b> | 1H                | triplet                    | 6.13                                                                              | 5.1      | -                                                                                   | -        |

**Table S2. Chemical shift ( $\delta$ ) values in  $^{13}\text{C}$  NMR spectra for aminoamide and aminoester based on caprylic acid ( $\text{CDCl}_3$ ).**

| Carbon atoms | 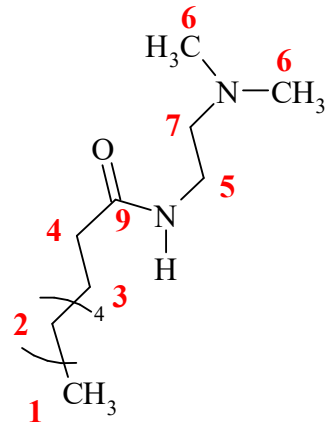 |  |
|--------------|-----------------------------------------------------------------------------------|------------------------------------------------------------------------------------|
|              | $\delta$ (ppm)                                                                    | $\delta$ (ppm)                                                                     |
| <b>1</b>     | 13.95                                                                             | 13.99                                                                              |
| <b>2</b>     | 22.49, 25.69, 28.92, 29.17                                                        | 22.52, 24.87, 28.86, 29.02                                                         |
| <b>3</b>     | 31.60                                                                             | 31.59                                                                              |
| <b>4</b>     | 36.55                                                                             | 34.19                                                                              |
| <b>5</b>     | 36.62                                                                             | 61.94                                                                              |
| <b>6</b>     | 44.99                                                                             | 45.64                                                                              |
| <b>7</b>     | 57.81                                                                             | 57.79                                                                              |
| <b>9</b>     | 173.21                                                                            | 173.86                                                                             |

Table S3. Chemical shifts ( $\delta$ ) and coupling constants ( $J$ ) values in  $^1\text{H}$  NMR spectra for amidequats based on caprylic acid ( $\text{CDCl}_3$ ).

| Protons  | Number of protons | Multiplicity of the signal | 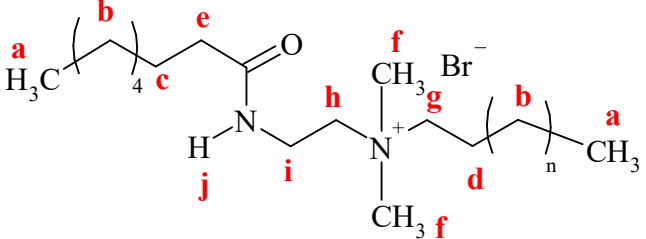 |          |                |          |                |          |                |          |                |          |                |          |                |          |
|----------|-------------------|----------------------------|------------------------------------------------------------------------------------|----------|----------------|----------|----------------|----------|----------------|----------|----------------|----------|----------------|----------|----------------|----------|
|          |                   |                            | Compound                                                                           |          |                |          |                |          |                |          |                |          |                |          |                |          |
|          |                   |                            | AC8                                                                                |          | AC9            |          | AC10           |          | AC11           |          | AC12           |          | AC14           |          | AC16           |          |
|          |                   |                            | n = 5                                                                              |          | n = 6          |          | n = 7          |          | n = 8          |          | n = 9          |          | n = 11         |          | n = 13         |          |
|          |                   |                            | $\delta$ (ppm)                                                                     | $J$ (Hz) | $\delta$ (ppm) | $J$ (Hz) | $\delta$ (ppm) | $J$ (Hz) | $\delta$ (ppm) | $J$ (Hz) | $\delta$ (ppm) | $J$ (Hz) | $\delta$ (ppm) | $J$ (Hz) | $\delta$ (ppm) | $J$ (Hz) |
| <b>a</b> | 6H                | triplet                    | 0.82                                                                               | 6.8      | 0.83           | 6.9      | 0.83           | 6.6      | 0.83           | 6.8      | 0.83           | 6.6      | 0.82           | 6.9      | 0.88           | 7.0      |
| <b>b</b> | 2(4+n)H           | multiple t                 | 1.21, 1.30                                                                         | -        | 1.21, 1.30     | -        | 1.21, 1.31     | -        | 1.20, 1.30     | -        | 1.21, 1.31     | -        | 1.20, 1.30     | -        | 1.25, 1.36     | -        |
| <b>c</b> | 2H                | quintet                    | 1.55                                                                               | 7.2      | 1.56           | 7.1      | 1.56           | 6.9      | 1.56           | 7.2      | 1.56           | 6.9      | 1.56           | 6.9      | 1.62           | 7.4      |
| <b>d</b> | 2H                | multiple t                 | 1.69                                                                               | -        | 1.69           | -        | 1.70           | -        | 1.69           | -        | 1.69           | -        | 1.68           | -        | 1.70           | -        |
| <b>e</b> | 2H                | triplet                    | 2.21                                                                               | 7.7      | 2.22           | 7.7      | 2.23           | 7.7      | 2.22           | 7.8      | 2.23           | 7.7      | 2.22           | 7.7      | 2.22           | 7.7      |
| <b>f</b> | 6H                | singlet                    | 3.32                                                                               | -        | 3.32           | -        | 3.32           | -        | 3.33           | -        | 3.33           | -        | 3.32           | -        | 3.32           | -        |
| <b>g</b> | 2H                | triplet                    | 3.51                                                                               | 8.5      | 3.52           | 8.5      | 3.50           | 8.4      | 3.52           | 8.6      | 3.51           | 8.3      | 3.51           | 8.4      | 3.50           | 8.6      |
| <b>h</b> | 2H                | multiple t                 | 3.70                                                                               | -        | 3.71           | -        | 3.71           | -        | 3.71           | -        | 3.72           | -        | 3.71           | -        | 3.77           | -        |
| <b>i</b> | 2H                |                            |                                                                                    |          |                |          |                |          |                |          |                |          |                |          |                |          |
| <b>j</b> | 1H                | triplet                    | 8.23                                                                               | 5.0      | 8.23           | 5.0      | 8.25           | 5.1      | 8.23           | 5.0      | 8.25           | 5.1      | 8.23           | 5.1      | 8.28           | 5.0      |

Table S4. Chemical shift ( $\delta$ ) values in  $^{13}\text{C}$  NMR spectra for amidequats based on caprylic acid ( $\text{CDCl}_3$ ).

| Carbon atoms   | 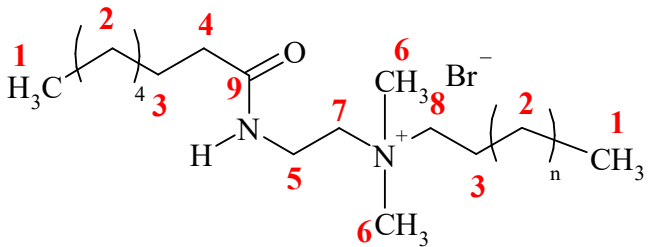 |                                                                           |                                                                                  |                                                                                             |                                                                                             |                                                                                                       |                                                                                  |
|----------------|------------------------------------------------------------------------------------|---------------------------------------------------------------------------|----------------------------------------------------------------------------------|---------------------------------------------------------------------------------------------|---------------------------------------------------------------------------------------------|-------------------------------------------------------------------------------------------------------|----------------------------------------------------------------------------------|
|                | Compound                                                                           |                                                                           |                                                                                  |                                                                                             |                                                                                             |                                                                                                       |                                                                                  |
|                | AC8                                                                                | AC9                                                                       | AC10                                                                             | AC11                                                                                        | AC12                                                                                        | AC14                                                                                                  | AC16                                                                             |
|                | n = 5                                                                              | n = 6                                                                     | n = 7                                                                            | n = 8                                                                                       | n = 9                                                                                       | n = 11                                                                                                | n = 13                                                                           |
| $\delta$ (ppm) | $\delta$ (ppm)                                                                     | $\delta$ (ppm)                                                            | $\delta$ (ppm)                                                                   | $\delta$ (ppm)                                                                              | $\delta$ (ppm)                                                                              | $\delta$ (ppm)                                                                                        |                                                                                  |
| <b>1</b>       | 13.86, 13.90                                                                       | 13.91                                                                     | 13.96                                                                            | 13.92, 13.94                                                                                | 13.96, 13.99                                                                                | 13.93, 13.96                                                                                          | 14.09                                                                            |
| <b>2</b>       | 22.38, 22.43,<br>22.69, 25.31,<br>26.09, 28.87,<br>28.89, 28.99,<br>29.16          | 22.45, 22.71,<br>25.33, 26.11,<br>28.90, 28.95,<br>29.05, 29.17,<br>29.18 | 22.50, 22.52,<br>22.75, 25.39,<br>26.16, 28.94,<br>29.10, 29.21,<br>29.28, 29.29 | 22.46, 22.50, 22.72,<br>25.34, 26.12, 28.92,<br>29.08, 29.12, 29.18,<br>29.25, 29.31, 29.37 | 22.50, 22.55, 22.75,<br>25.39, 26.17, 28.95,<br>29.11, 29.20, 29.21,<br>29.29, 29.35, 29.46 | 22.48, 22.53, 22.74,<br>25.35, 26.14, 28.92,<br>29.10, 29.20, 29.27,<br>29.33, 29.45, 29.49,<br>29.52 | 22.62, 22.67,<br>22.85, 25.48,<br>26.24, 29.17,<br>29.33, 29.43,<br>29.56, 29.65 |
| <b>3</b>       | 31.45, 31.53                                                                       | 31.54, 31.59                                                              | 31.59, 31.70                                                                     | 31.56, 31.70                                                                                | 31.60, 31.76                                                                                | 31.56, 31.76                                                                                          | 31.81, 31.90                                                                     |
| <b>4</b>       | 33.85                                                                              | 33.86                                                                     | 33.89                                                                            | 33.87                                                                                       | 33.92                                                                                       | 33.89                                                                                                 | 34.05                                                                            |
| <b>5</b>       | 36.15                                                                              | 36.17                                                                     | 36.19                                                                            | 36.17                                                                                       | 36.20                                                                                       | 36.17                                                                                                 | 36.34                                                                            |
| <b>6</b>       | 51.56                                                                              | 51.57                                                                     | 51.60                                                                            | 51.57                                                                                       | 51.61                                                                                       | 51.58                                                                                                 | 51.74                                                                            |
| <b>7</b>       | 62.47                                                                              | 62.49                                                                     | 62.56                                                                            | 62.50                                                                                       | 62.56                                                                                       | 62.52                                                                                                 | 62.88                                                                            |
| <b>8</b>       | 65.39                                                                              | 65.41                                                                     | 65.49                                                                            | 65.42                                                                                       | 65.50                                                                                       | 65.44                                                                                                 | 65.86                                                                            |
| <b>9</b>       | 174.59                                                                             | 174.61                                                                    | 174.75                                                                           | 174.62                                                                                      | 174.72                                                                                      | 174.64                                                                                                | 174.91                                                                           |



Table S5. Chemical shifts ( $\delta$ ) and coupling constants ( $J$ ) values in  $^1\text{H}$  NMR spectra for esterquats based on caprylic acid ( $\text{CDCl}_3$ ).

| Protons  | Number of protons | Multiplicity of the signal | 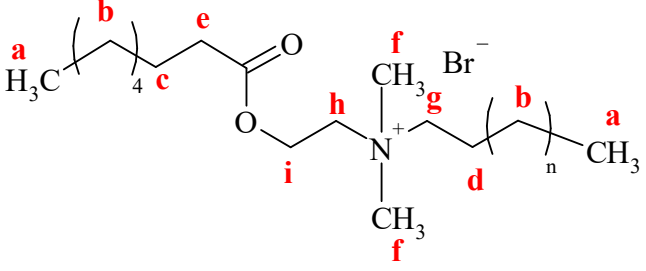 |                   |               |                   |               |                   |               |                   |               |                   |               |                   |               |     |
|----------|-------------------|----------------------------|------------------------------------------------------------------------------------|-------------------|---------------|-------------------|---------------|-------------------|---------------|-------------------|---------------|-------------------|---------------|-------------------|---------------|-----|
|          |                   |                            | Compound                                                                           |                   |               |                   |               |                   |               |                   |               |                   |               |                   |               |     |
|          |                   |                            | EC8                                                                                |                   | EC9           |                   | EC10          |                   | EC11          |                   | EC12          |                   | EC14          |                   | EC16          |     |
|          |                   |                            | m = 5                                                                              |                   | m = 6         |                   | m = 7         |                   | m = 8         |                   | m = 9         |                   | m = 11        |                   | m = 13        |     |
|          |                   | $\delta$<br>(ppm)          | $J$<br>(Hz)                                                                        | $\delta$<br>(ppm) | $J$<br>(Hz)   | $\delta$<br>(ppm) | $J$<br>(Hz)   | $\delta$<br>(ppm) | $J$<br>(Hz)   | $\delta$<br>(ppm) | $J$<br>(Hz)   | $\delta$<br>(ppm) | $J$<br>(Hz)   | $\delta$<br>(ppm) | $J$<br>(Hz)   |     |
| <b>a</b> | 6H                | triplet                    | 0.88                                                                               | 6.4               | 0.88          | 6.5               | 0.88          | 6.4               | 0.88          | 6.7               | 0.88          | 6.7               | 0.88          | 6.7               | 0.88          | 6.8 |
| <b>b</b> | 2(4+n)H           | multiple<br>t              | 1.28,<br>1.36                                                                      | -                 | 1.27,<br>1.36 | -                 | 1.26,<br>1.36 | -                 | 1.26,<br>1.36 | -                 | 1.26,<br>1.36 | -                 | 1.26,<br>1.36 | -                 | 1.26,<br>1.35 | -   |
| <b>c</b> | 2H                | quintet                    | 1.61                                                                               | 7.2               | 1.61          | 7.2               | 1.61          | 7.2               | 1.61          | 7.3               | 1.61          | 7.2               | 1.61          | 7.2               | 1.61          | 7.0 |
| <b>d</b> | 2H                | multiple<br>t              | 1.78                                                                               | -                 | 1.78          | -                 | 1.77          | -                 | 1.77          | -                 | 1.77          | -                 | 1.77          | -                 | 1.76          | -   |
| <b>e</b> | 2H                | triplet                    | 2.35                                                                               | 7.6               | 2.35          | 7.7               | 2.35          | 7.6               | 2.35          | 7.7               | 2.35          | 7.7               | 2.35          | 7.7               | 2.35          | 7.6 |
| <b>f</b> | 6H                | singlet                    | 3.49                                                                               | -                 | 3.50          | -                 | 3.48          | -                 | 3.51          | -                 | 3.50          | -                 | 3.51          | -                 | 3.49          | -   |
| <b>g</b> | 2H                | triplet                    | 3.65                                                                               | 8.4               | 3.63          | 8.5               | 3.59          | 8.4               | 3.62          | 8.5               | 3.63          | 8.5               | 3.62          | 8.5               | 3.58          | 8.4 |
| <b>h</b> | 2H                | triplet                    | 4.08                                                                               | 4.6               | 4.09          | 4.8               | 4.05          | 4.6               | 4.09          | 4.8               | 4.09          | 4.7               | 4.09          | 4.7               | 4.07          | 4.8 |
| <b>i</b> | 2H                | triplet                    | 4.58                                                                               | 4.4               | 4.58          | 4.6               | 4.58          | 4.5               | 4.57          | 4.6               | 4.58          | 4.5               | 4.57          | 4.6               | 4.57          | 4.7 |

Table S6. Chemical shift ( $\delta$ ) values in  $^{13}\text{C}$  NMR spectra for esterquats based on caprylic acid ( $\text{CDCl}_3$ ).

| Carbon atoms   | 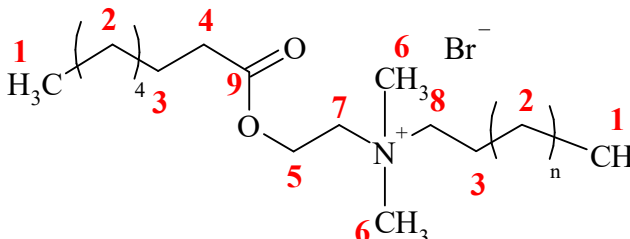 |                                                                           |                                                                                  |                                                                                            |                                                                                            |                                                                                                              |                                                                                                                                      |
|----------------|------------------------------------------------------------------------------------|---------------------------------------------------------------------------|----------------------------------------------------------------------------------|--------------------------------------------------------------------------------------------|--------------------------------------------------------------------------------------------|--------------------------------------------------------------------------------------------------------------|--------------------------------------------------------------------------------------------------------------------------------------|
|                | Compound                                                                           |                                                                           |                                                                                  |                                                                                            |                                                                                            |                                                                                                              |                                                                                                                                      |
|                | EC8                                                                                | EC9                                                                       | EC10                                                                             | EC11                                                                                       | EC12                                                                                       | EC14                                                                                                         | EC16                                                                                                                                 |
|                | n = 5                                                                              | n = 6                                                                     | n = 7                                                                            | n = 8                                                                                      | n = 9                                                                                      | n = 11                                                                                                       | n = 13                                                                                                                               |
| $\delta$ (ppm) | $\delta$ (ppm)                                                                     | $\delta$ (ppm)                                                            | $\delta$ (ppm)                                                                   | $\delta$ (ppm)                                                                             | $\delta$ (ppm)                                                                             | $\delta$ (ppm)                                                                                               |                                                                                                                                      |
| <b>1</b>       | 13.74                                                                              | 13.86, 13.89                                                              | 13.92, 13.96                                                                     | 19.91, 13.97                                                                               | 13.84, 13.90                                                                               | 13.91, 13.98                                                                                                 | 13.96, 14.02                                                                                                                         |
| <b>2</b>       | 22.26, 22.66,<br>24.37, 26.00,<br>28.58, 28.77,<br>28.78, 28.92,                   | 22.38, 22.43,<br>22.78, 24.49,<br>26.12, 28.71,<br>28.89, 28.95,<br>29.21 | 22.45, 22.52,<br>22.82, 24.55,<br>26.19, 28.78,<br>28.95, 29.12,<br>29.16, 29.32 | 22.44, 22.53,<br>22.83, 24.55,<br>26.19, 28.77,<br>28.95, 29.16,<br>29.31, 29.36,<br>29.41 | 22.37, 22.46,<br>22.76, 24.47,<br>26.12, 28.69,<br>28.87, 29.11,<br>29.25, 29.29,<br>29.39 | 22.45, 22.55, 22.83,<br>24.55, 26.20, 28.77,<br>28.95, 29.17, 29.22,<br>29.32, 29.37, 29.47,<br>29.52, 29.55 | 22.48, 22.59, 22.80,<br>22.86, 24.72, 26.20,<br>28.81, 28.98, 29.15,<br>29.21, 29.26, 29.33,<br>29.37, 29.41, 29.52,<br>29.57, 29.60 |
| <b>3</b>       | 31.31, 31.34                                                                       | 31.44, 31.58                                                              | 31.49, 31.70                                                                     | 31.49, 31.74                                                                               | 31.41, 31.68                                                                               | 31.49, 31.78                                                                                                 | 31.53, 31.82                                                                                                                         |
| <b>4</b>       | 33.75                                                                              | 33.87                                                                     | 33.94                                                                            | 33.93                                                                                      | 33.86                                                                                      | 33.93                                                                                                        | 33.96                                                                                                                                |
| <b>5</b>       | 61.90                                                                              | 62.00                                                                     | 62.08                                                                            | 62.03                                                                                      | 61.97                                                                                      | 62.04                                                                                                        | 62.11                                                                                                                                |
| <b>6</b>       | 51.62                                                                              | 51.73                                                                     | 51.86                                                                            | 51.78                                                                                      | 51.71                                                                                      | 51.79                                                                                                        | 52.02                                                                                                                                |
| <b>7</b>       | 57.43                                                                              | 57.49                                                                     | 57.60                                                                            | 57.51                                                                                      | 57.49                                                                                      | 57.52                                                                                                        | 57.54                                                                                                                                |
| <b>8</b>       | 65.17                                                                              | 65.26                                                                     | 65.31                                                                            | 65.30                                                                                      | 65.22                                                                                      | 65.30                                                                                                        | 65.37                                                                                                                                |
| <b>9</b>       | 172.44                                                                             | 172.57                                                                    | 172.67                                                                           | 172.62                                                                                     | 172.55                                                                                     | 172.63                                                                                                       | 172.68                                                                                                                               |

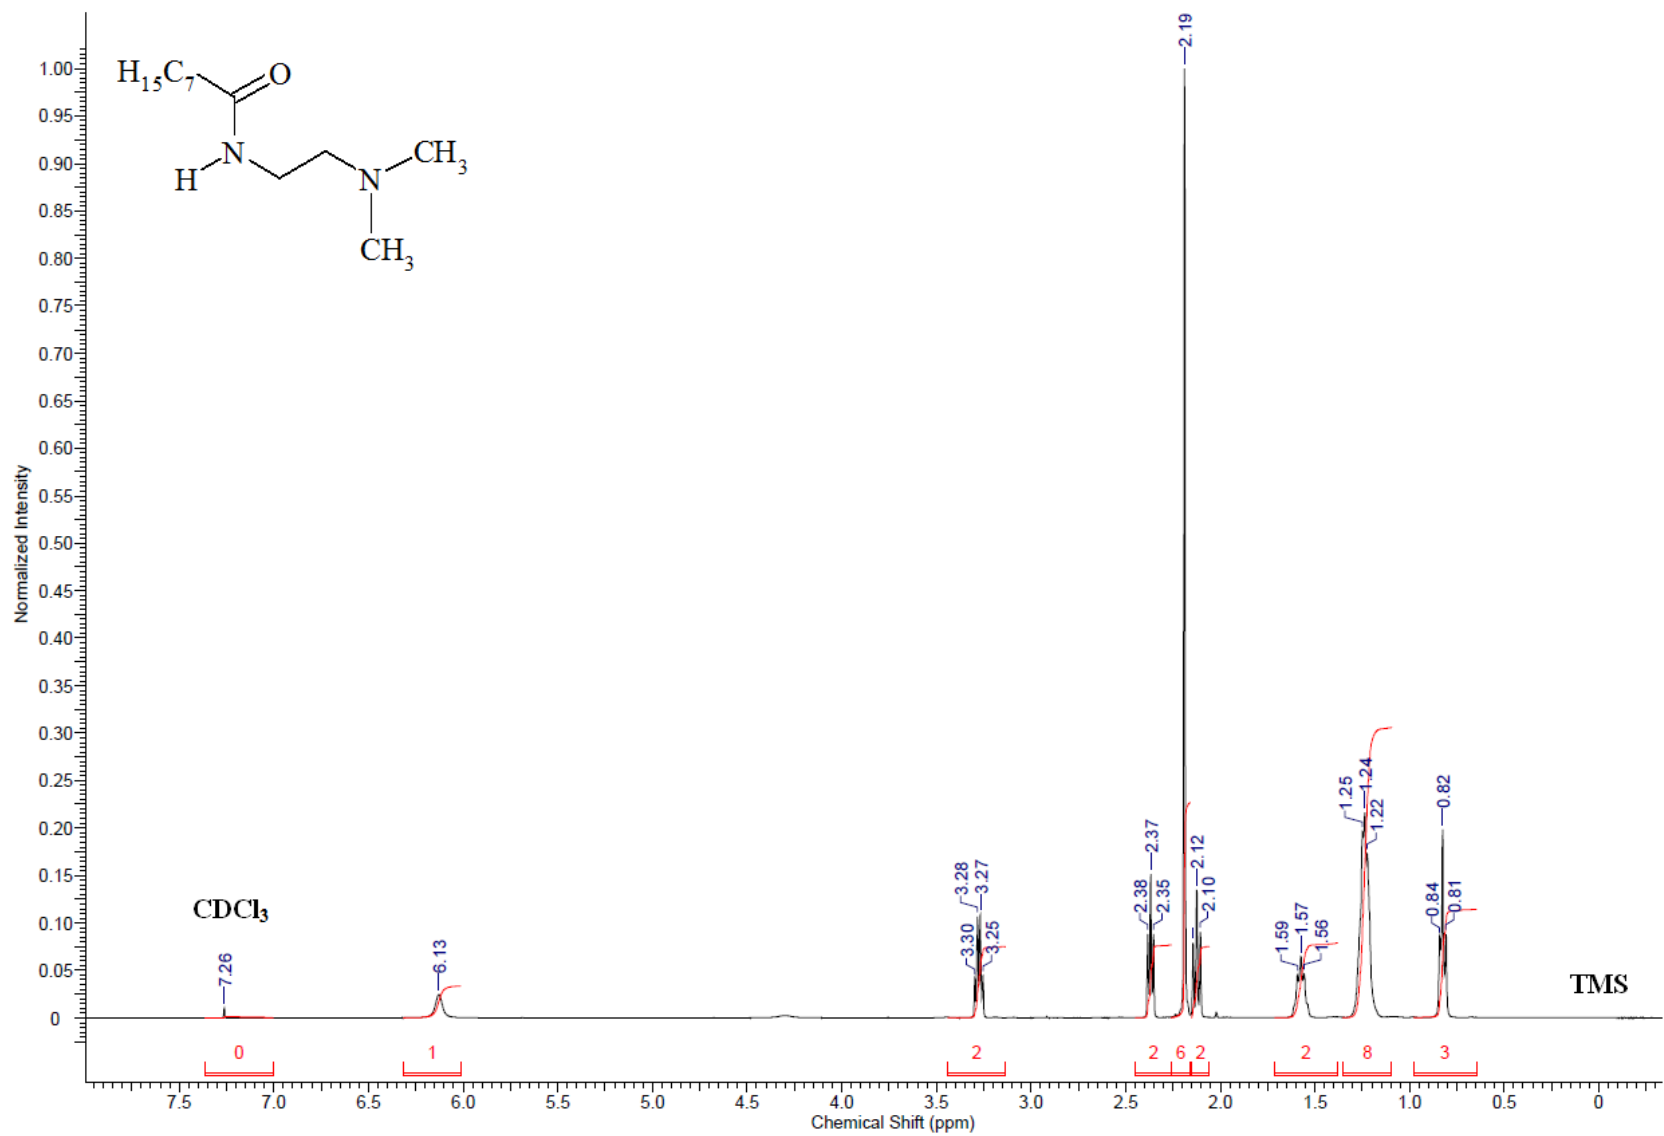

**Fig. S1.**  $^1\text{H}$  NMR spectrum of *N*-[(2-dimethylamino)ethyl]octanamide.

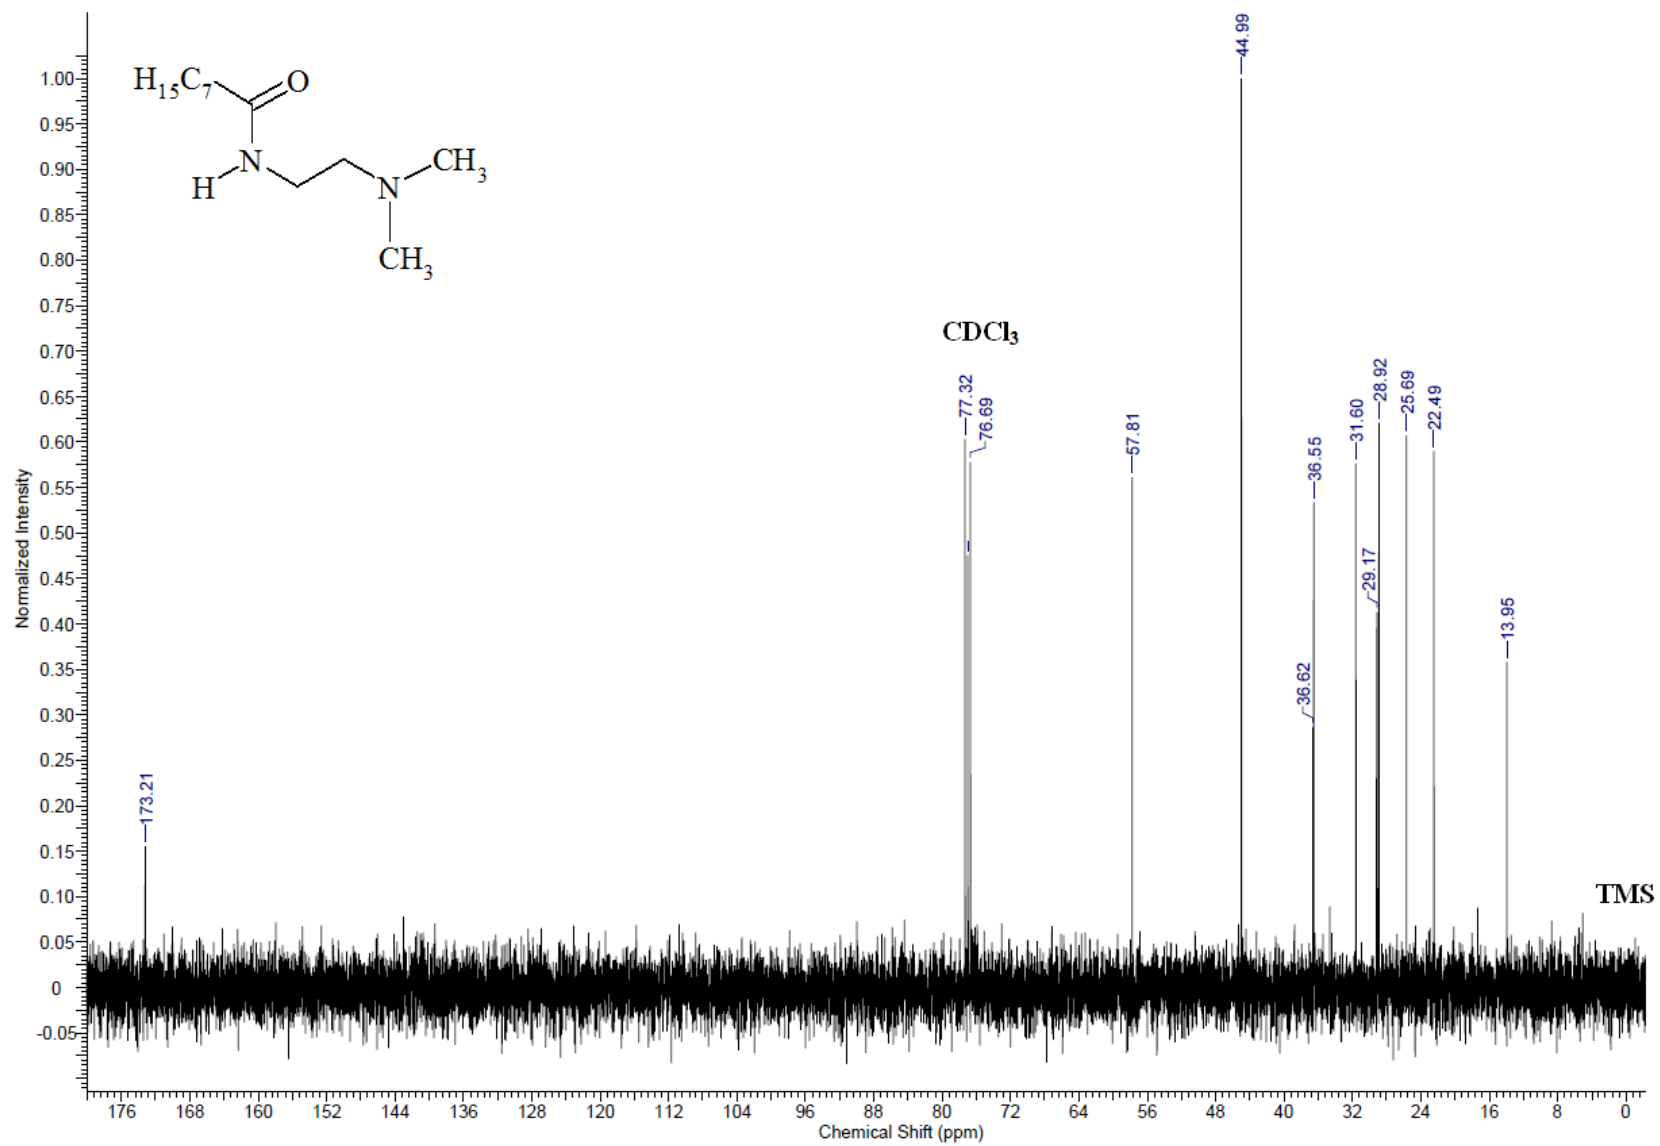

**Fig. S2.** <sup>13</sup>C NMR spectrum of *N*-[(2-dimethylamino)ethyl]octanamide.

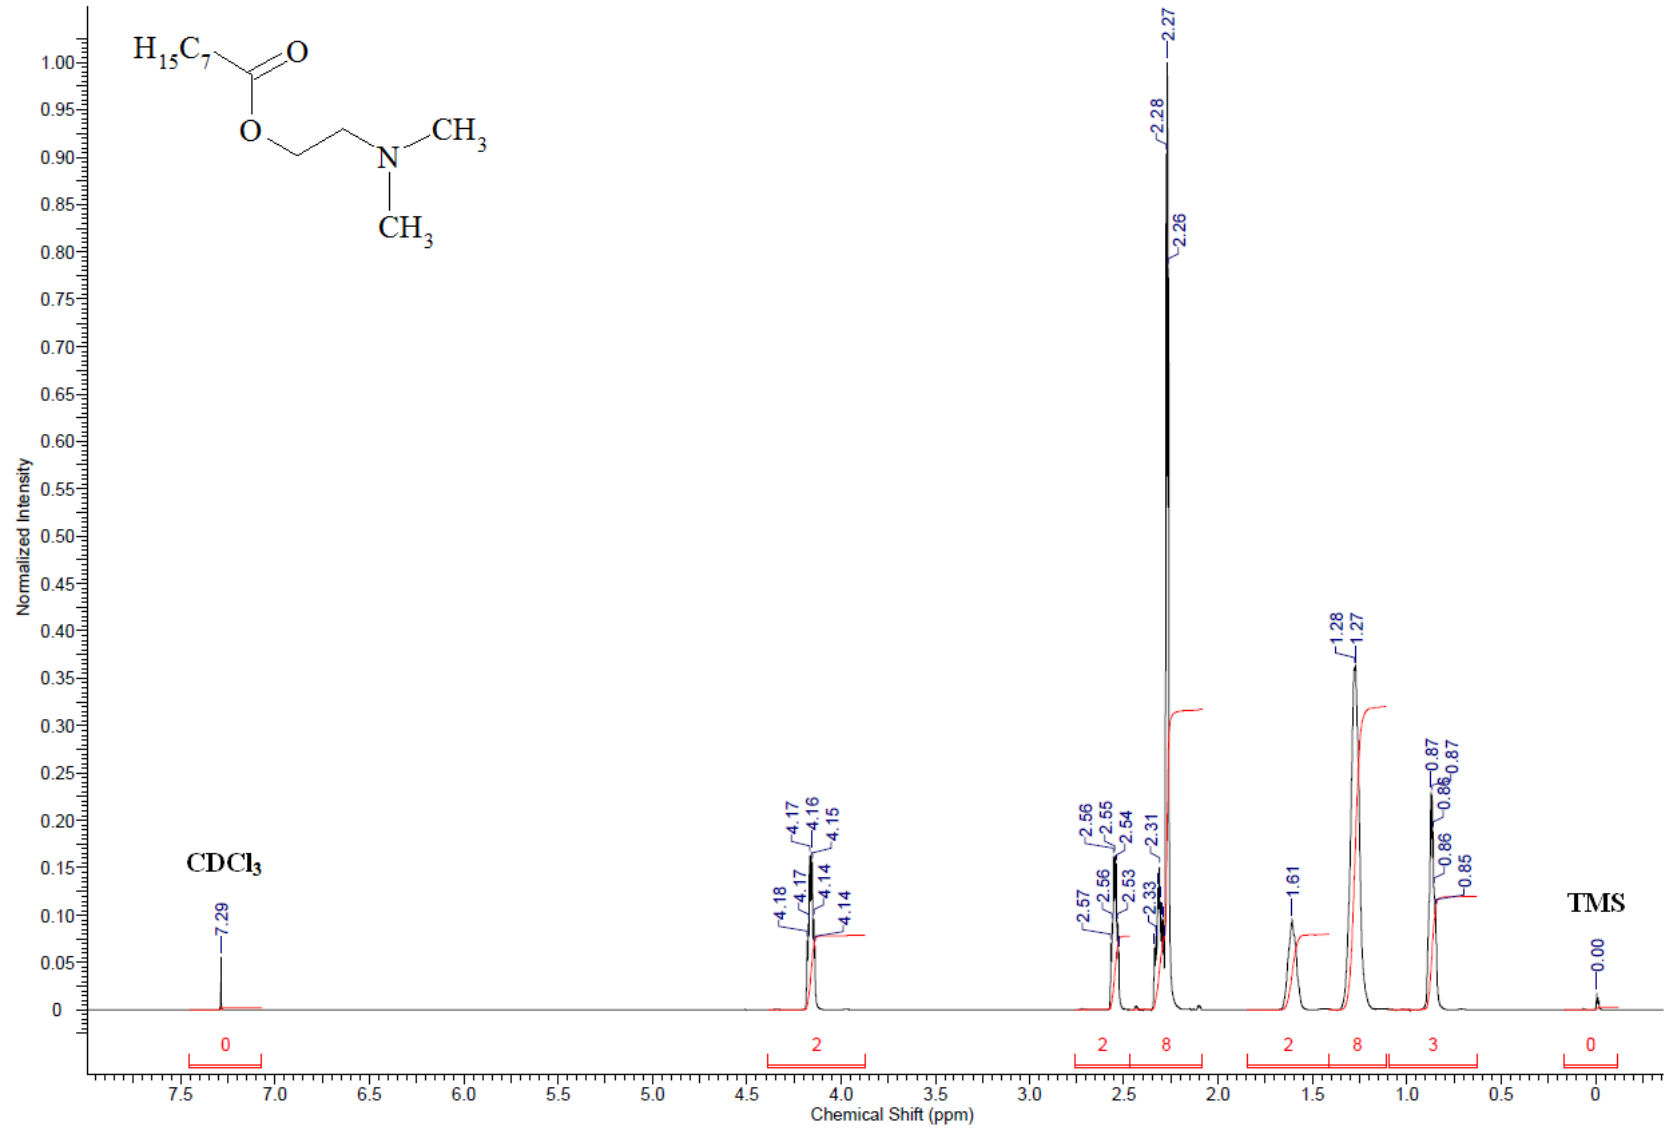

**Fig. S3.** <sup>1</sup>H NMR spectrum of (2-dimethylamino)ethyl octanoate.

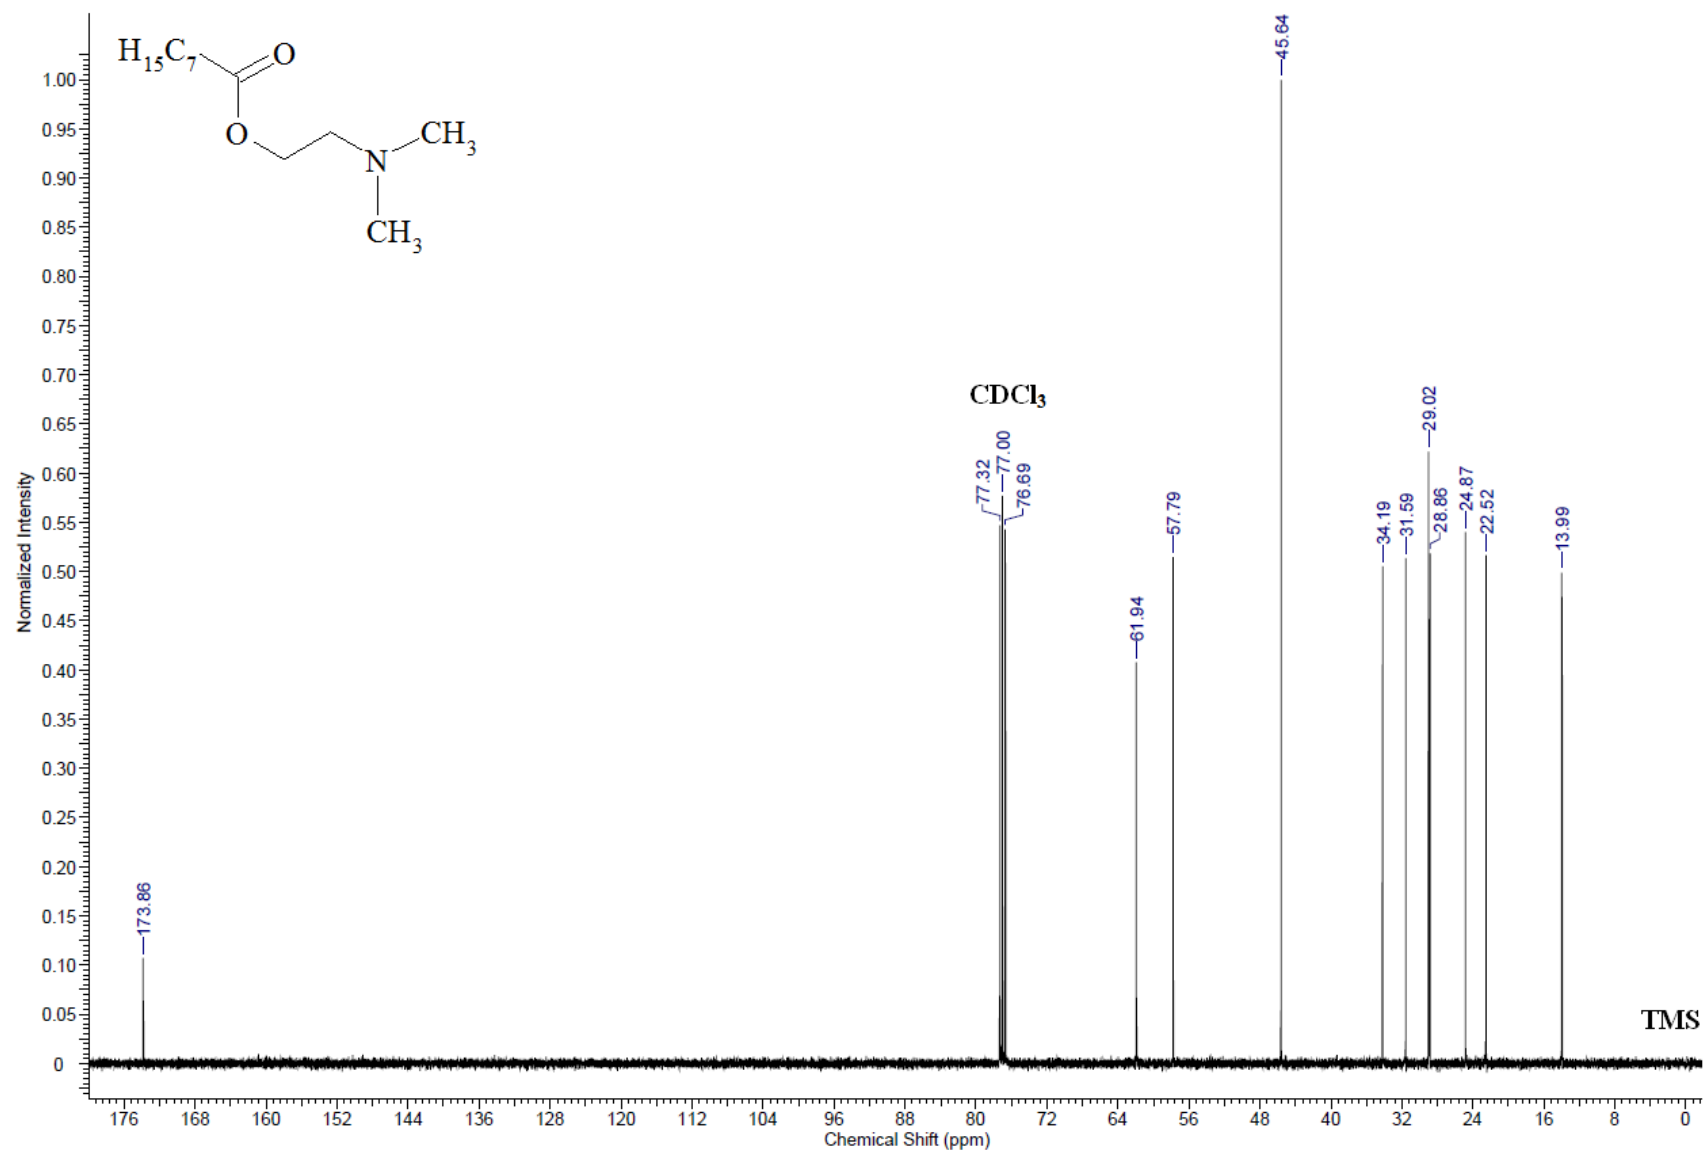

**Fig. S4.**  $^{13}\text{C}$  NMR spectrum of (2-dimethylamino)ethyl octanoate.

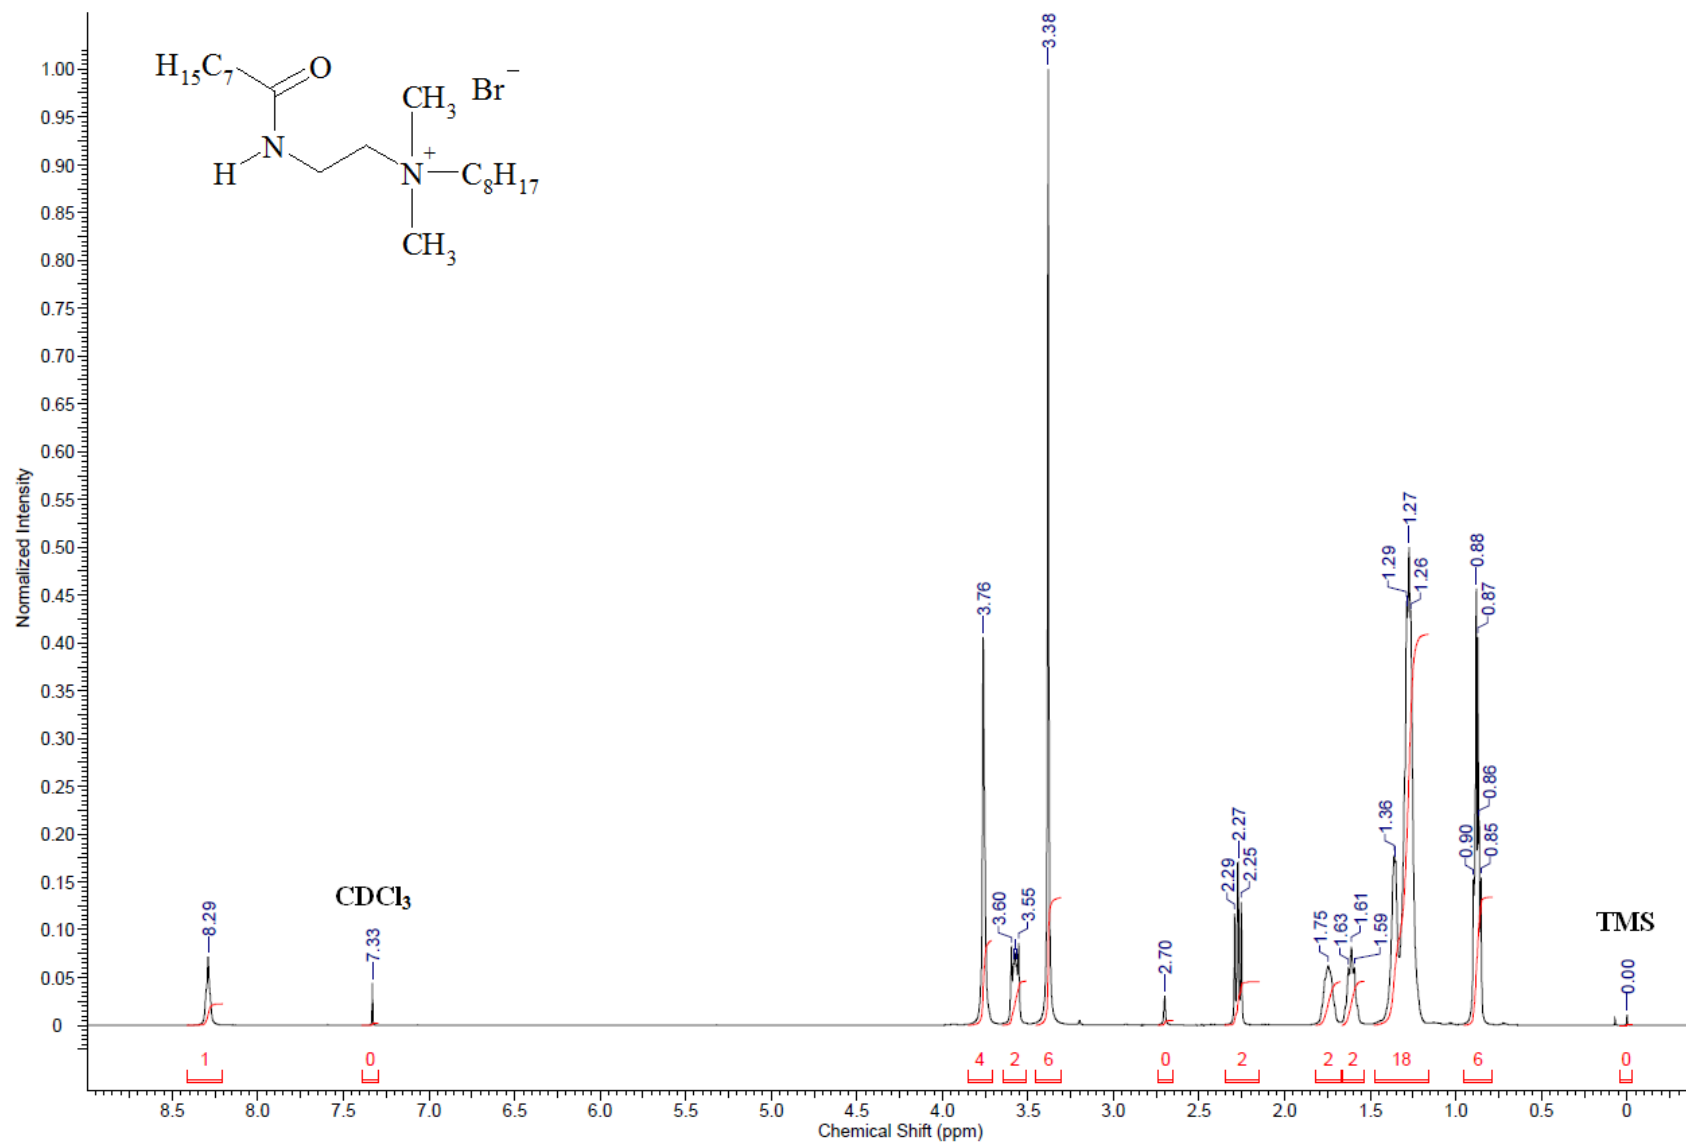

Fig. S5.  $^1\text{H}$  NMR spectrum of dimethyl-*N*-[(2-octanamido)ethyl]octylammonium bromide (**AC8**).

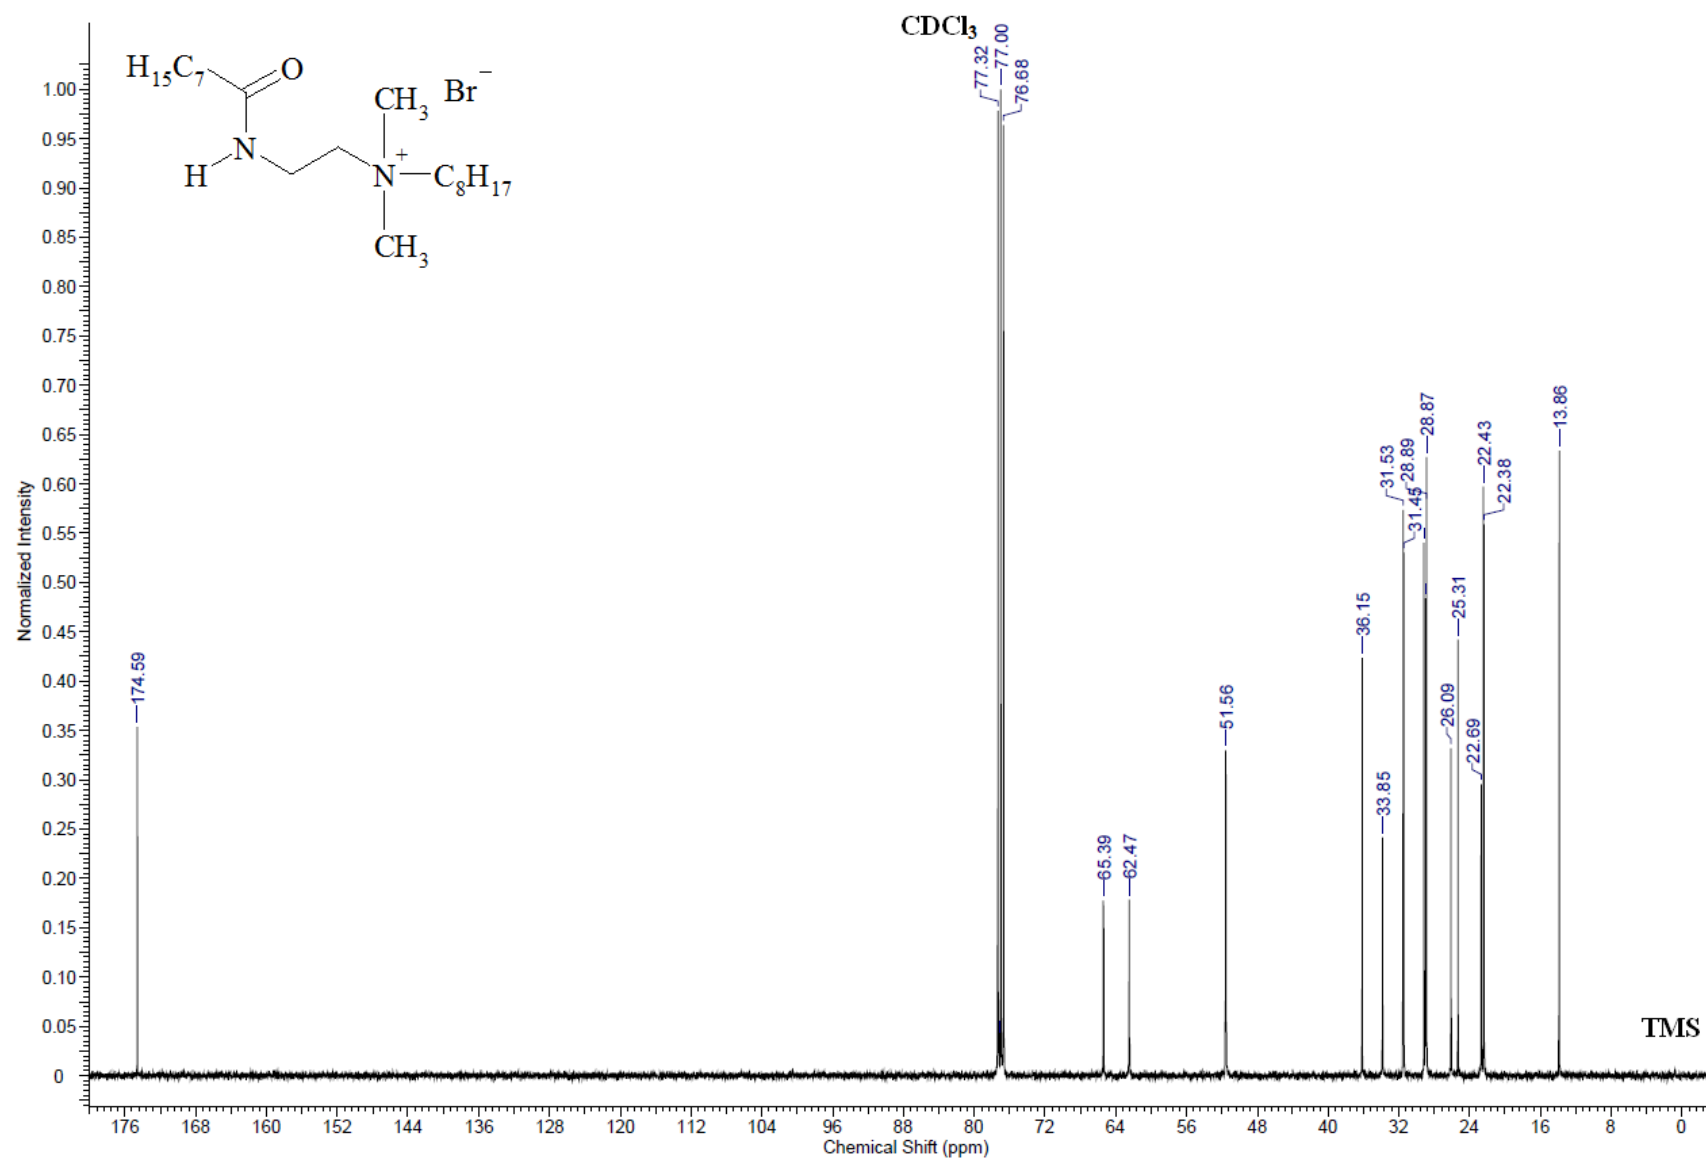

**Fig. S6.** <sup>13</sup>C NMR spectrum of dimethyl-*N*-[(2-octanamido)ethyl]octylammonium bromide (**AC8**).



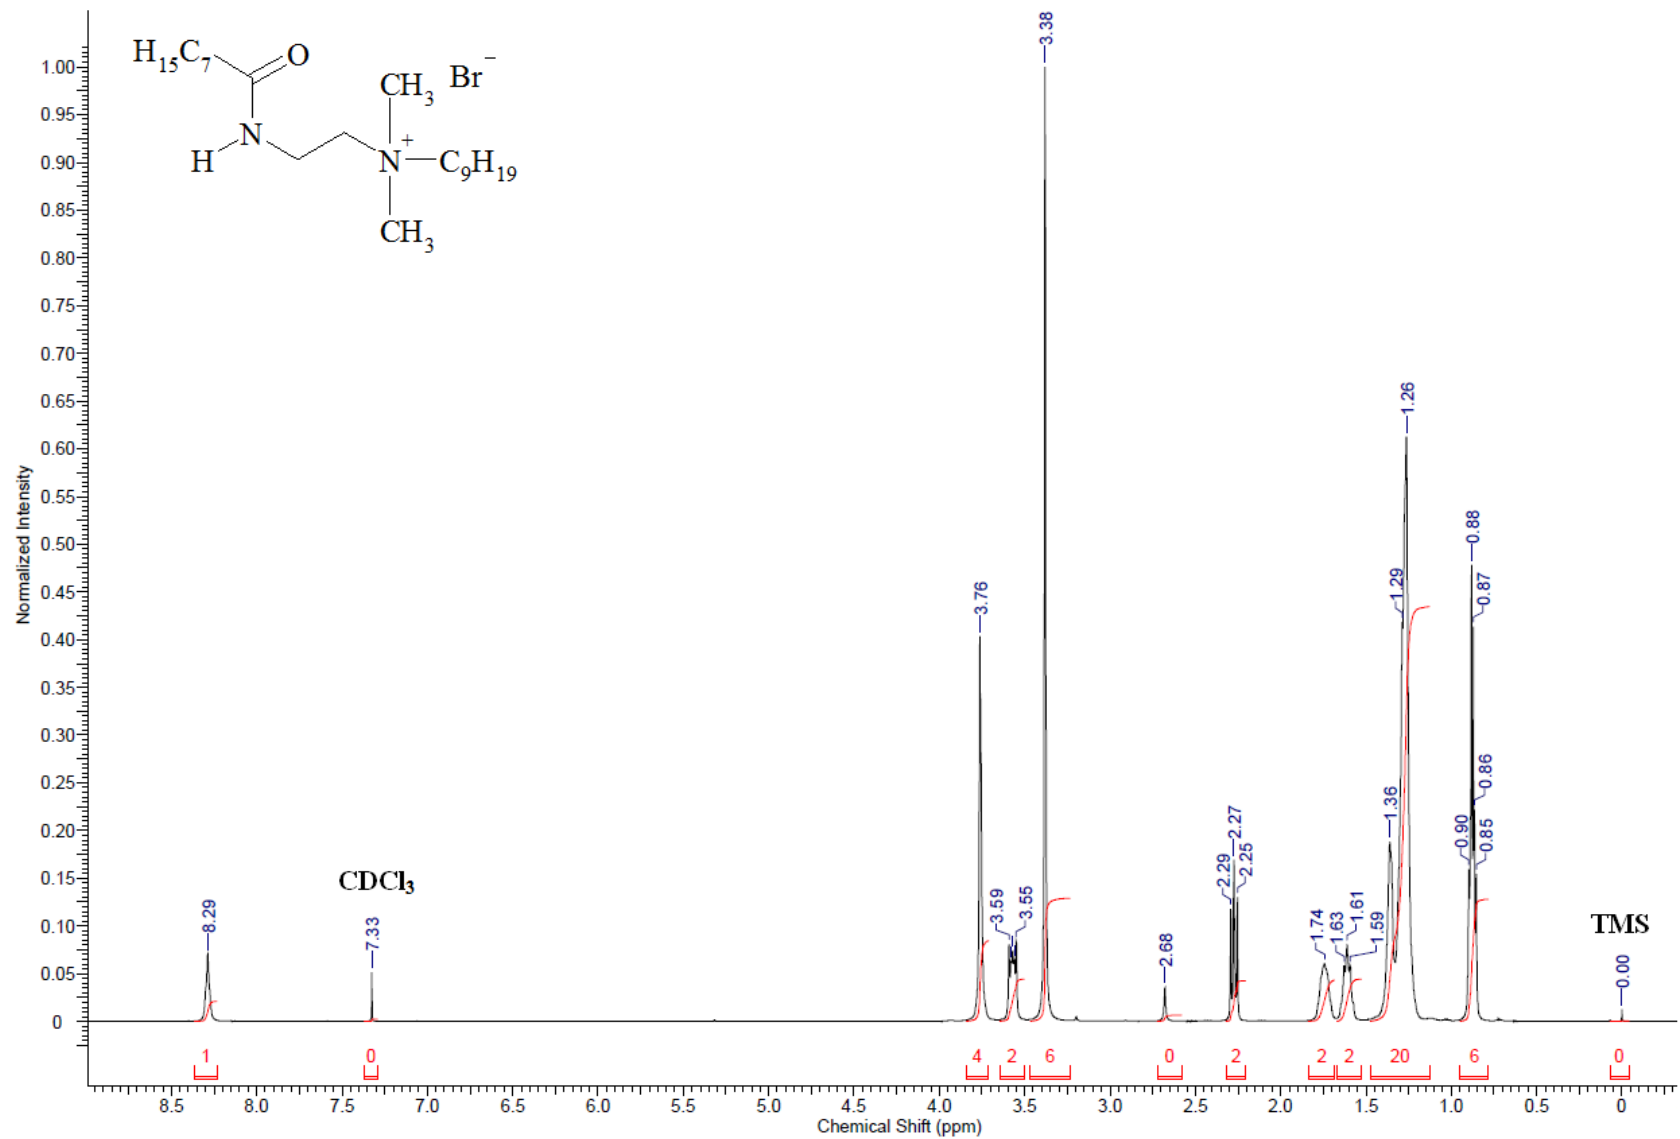

Fig. S7.  $^1\text{H}$  NMR spectrum of dimethylnonyl-*N*-[(2-octanamido)ethyl]ammonium bromide (AC9).

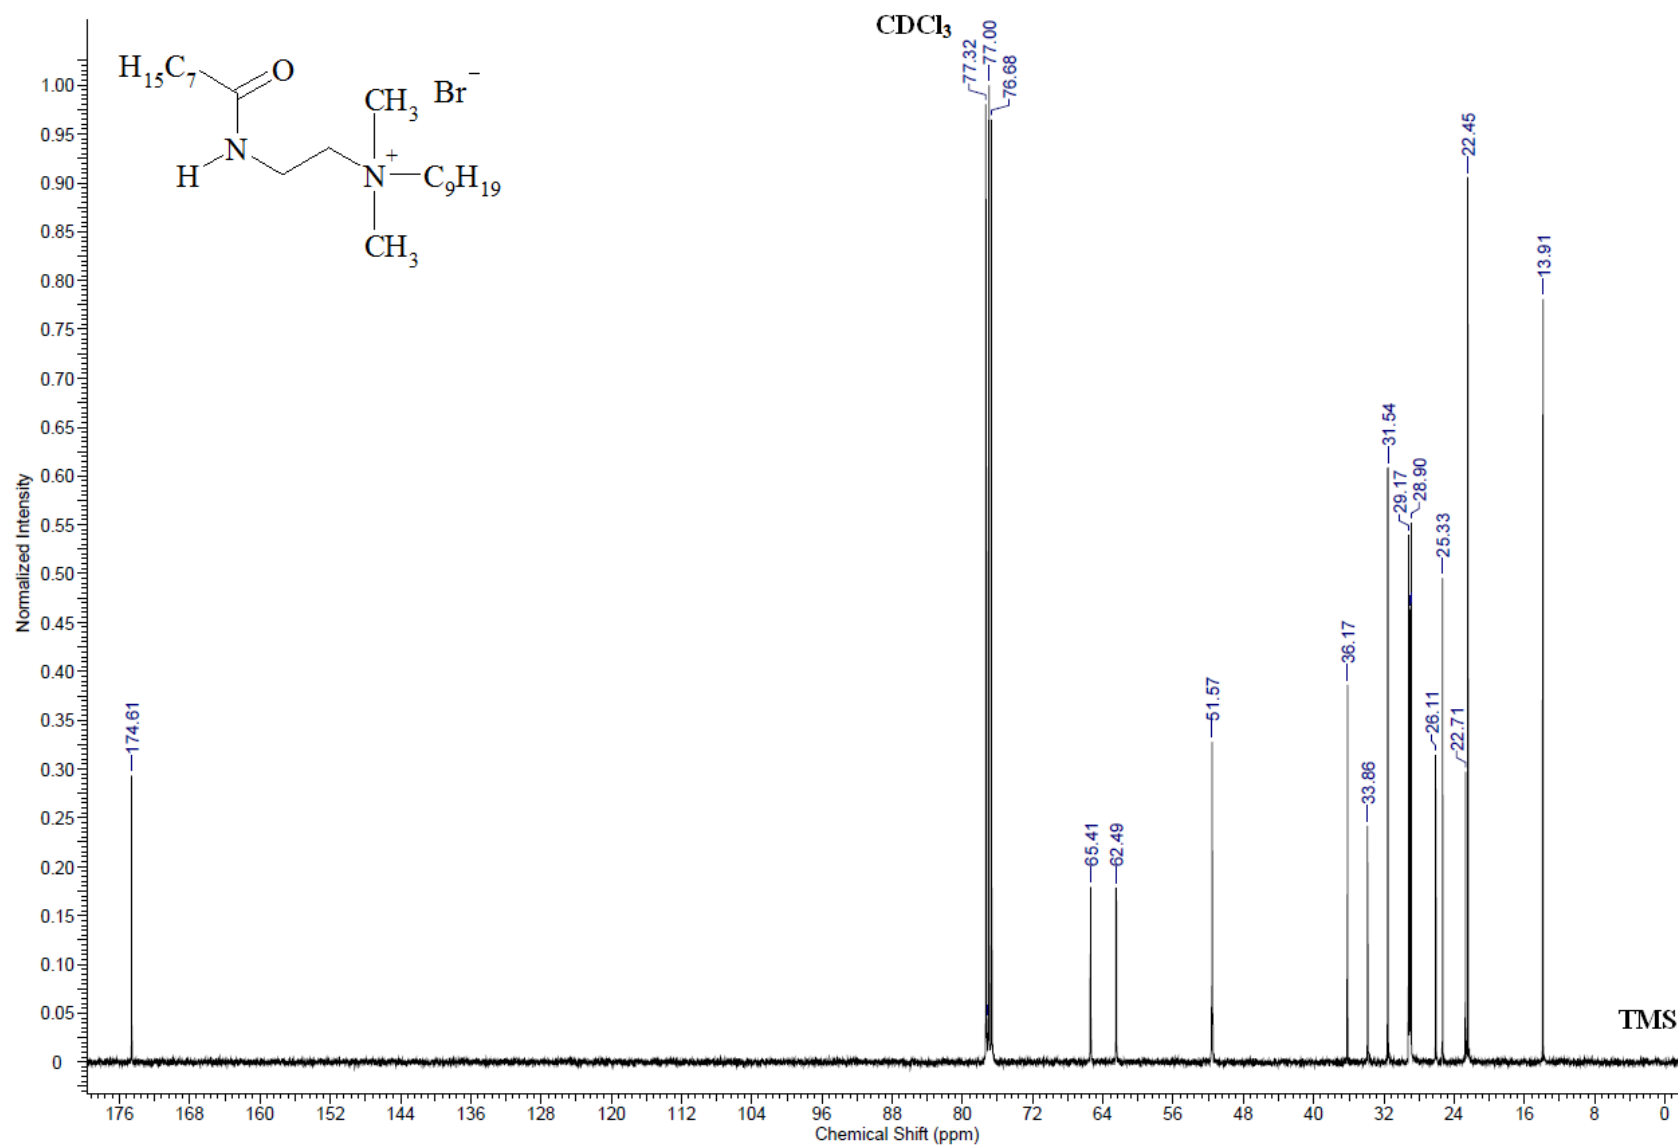

Fig. S8.  $^{13}\text{C}$  NMR spectrum of dimethylnonyl-*N*-[(2-octanamido)ethyl]ammonium bromide (AC9).

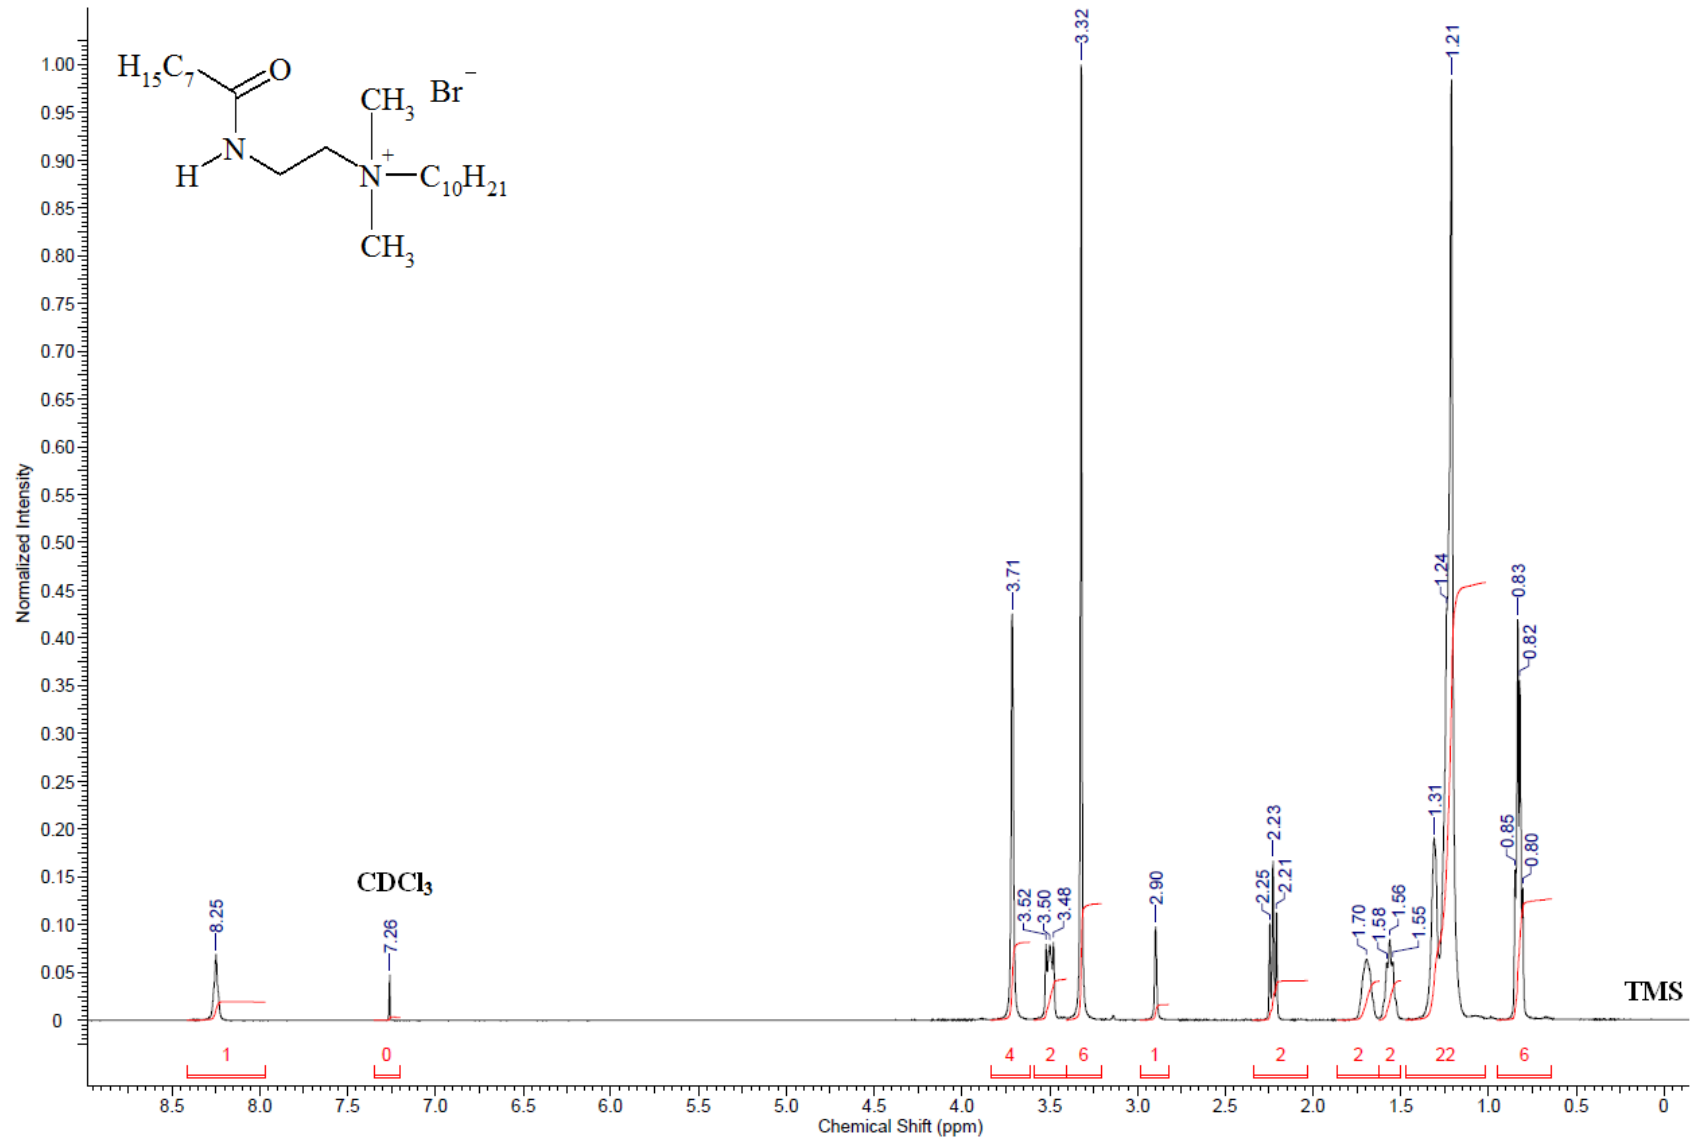

Fig. S9. <sup>1</sup>H NMR spectrum of decyldimethyl-*N*-[(2-octanamido)ethyl]ammonium bromide (AC10).

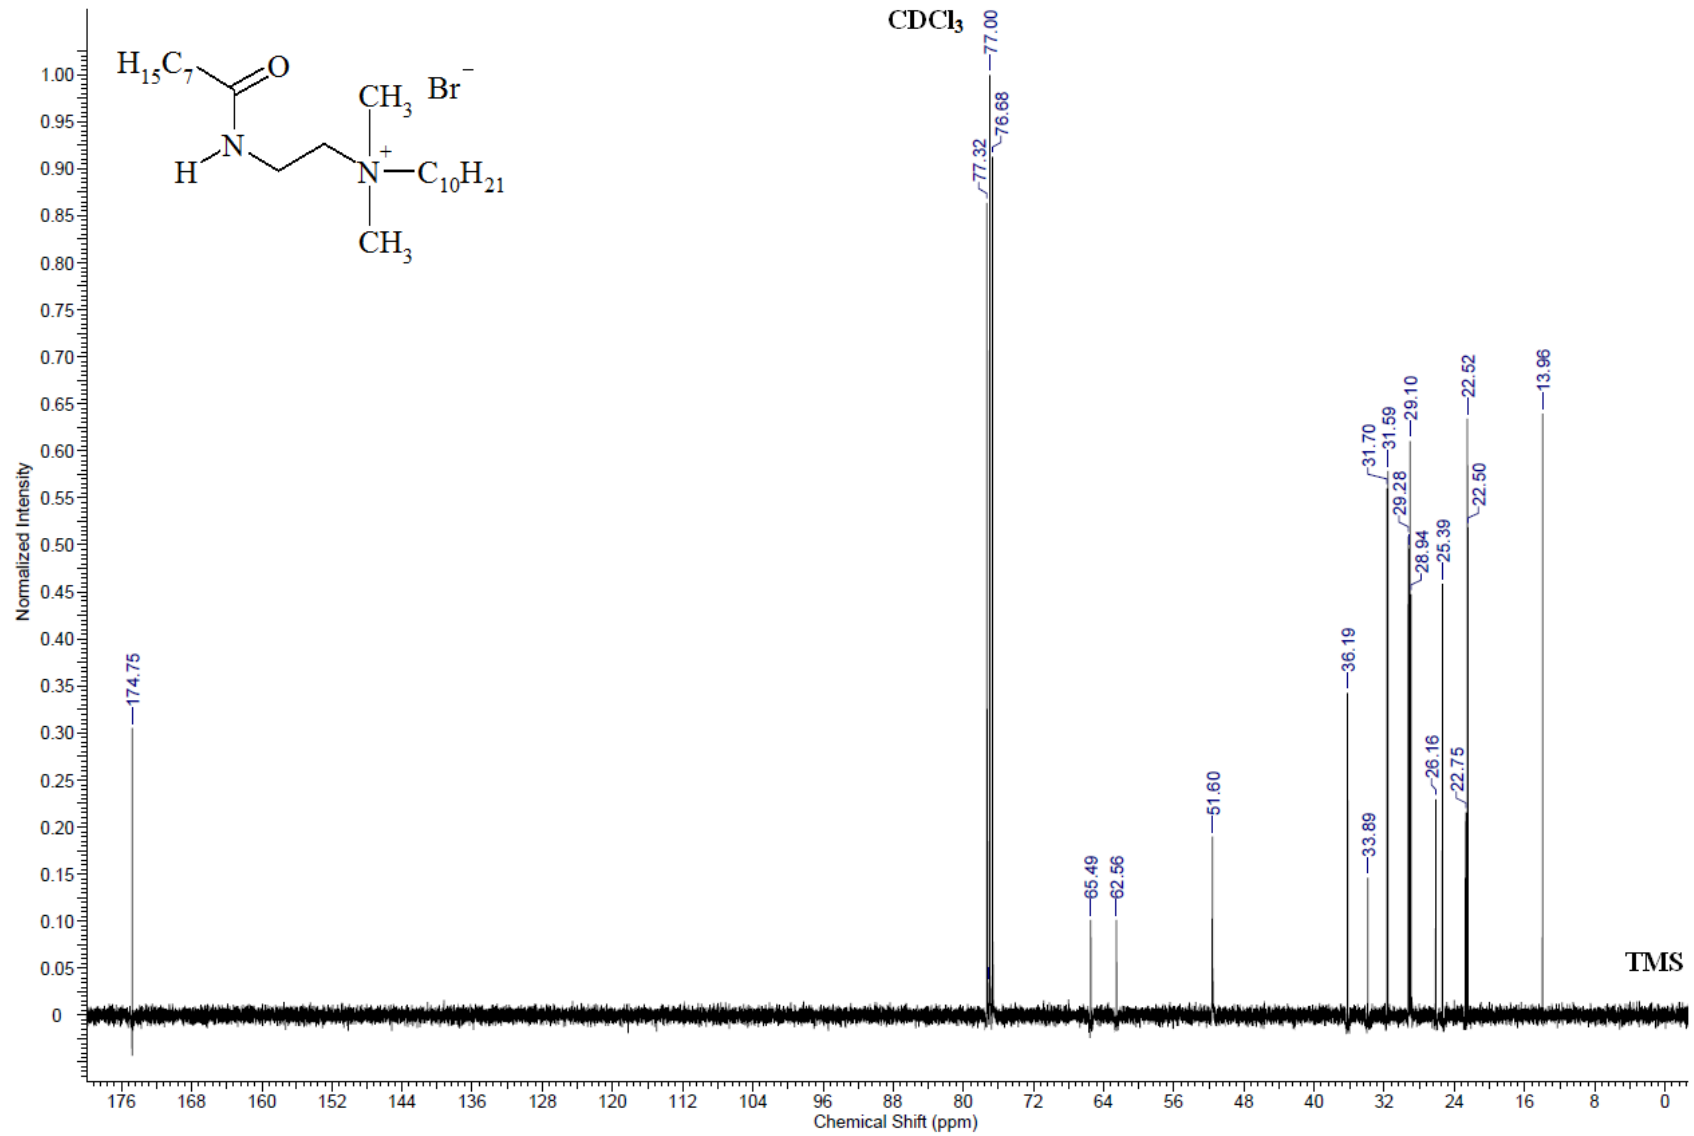

Fig. S10.  $^{13}\text{C}$  NMR spectrum of decyldimethyl-*N*-[(2-octanamido)ethyl]ammonium bromide (AC10).

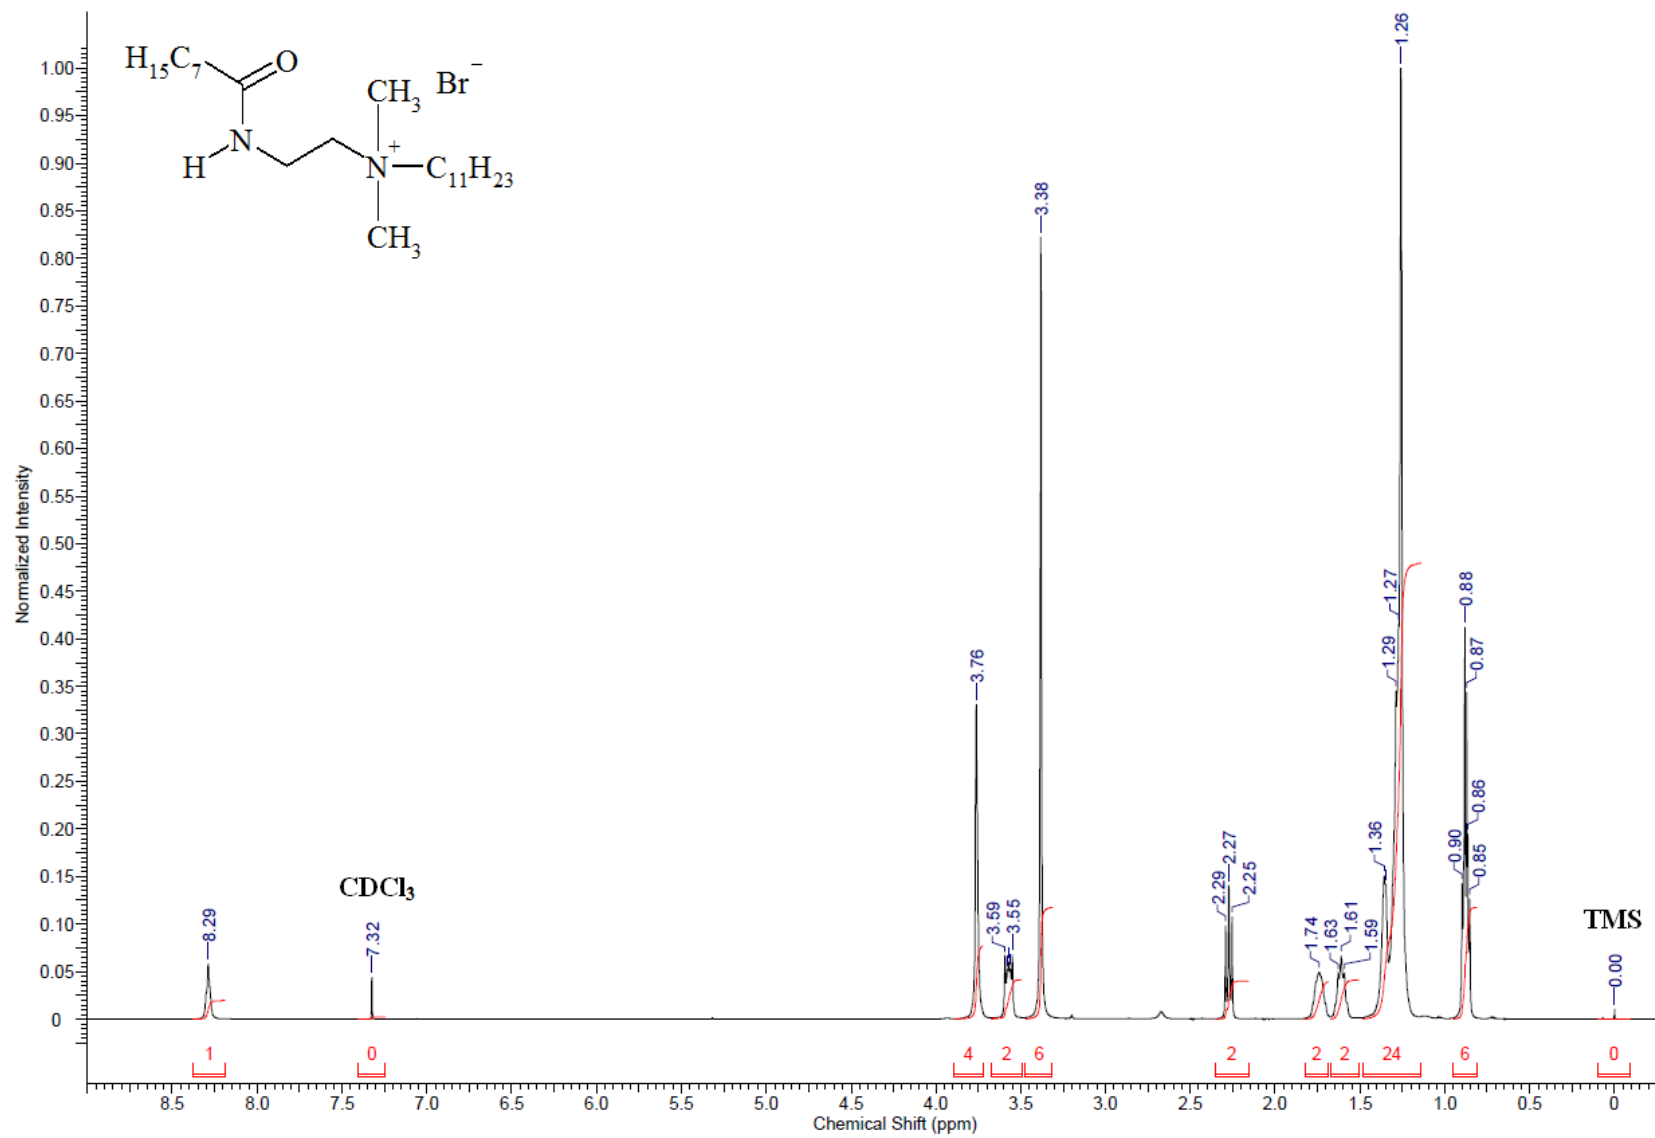

**Fig. S11.** <sup>1</sup>H NMR spectrum of dimethyl-*N*-[(2-octanamido)ethyl]undecylammonium bromide (**AC11**).

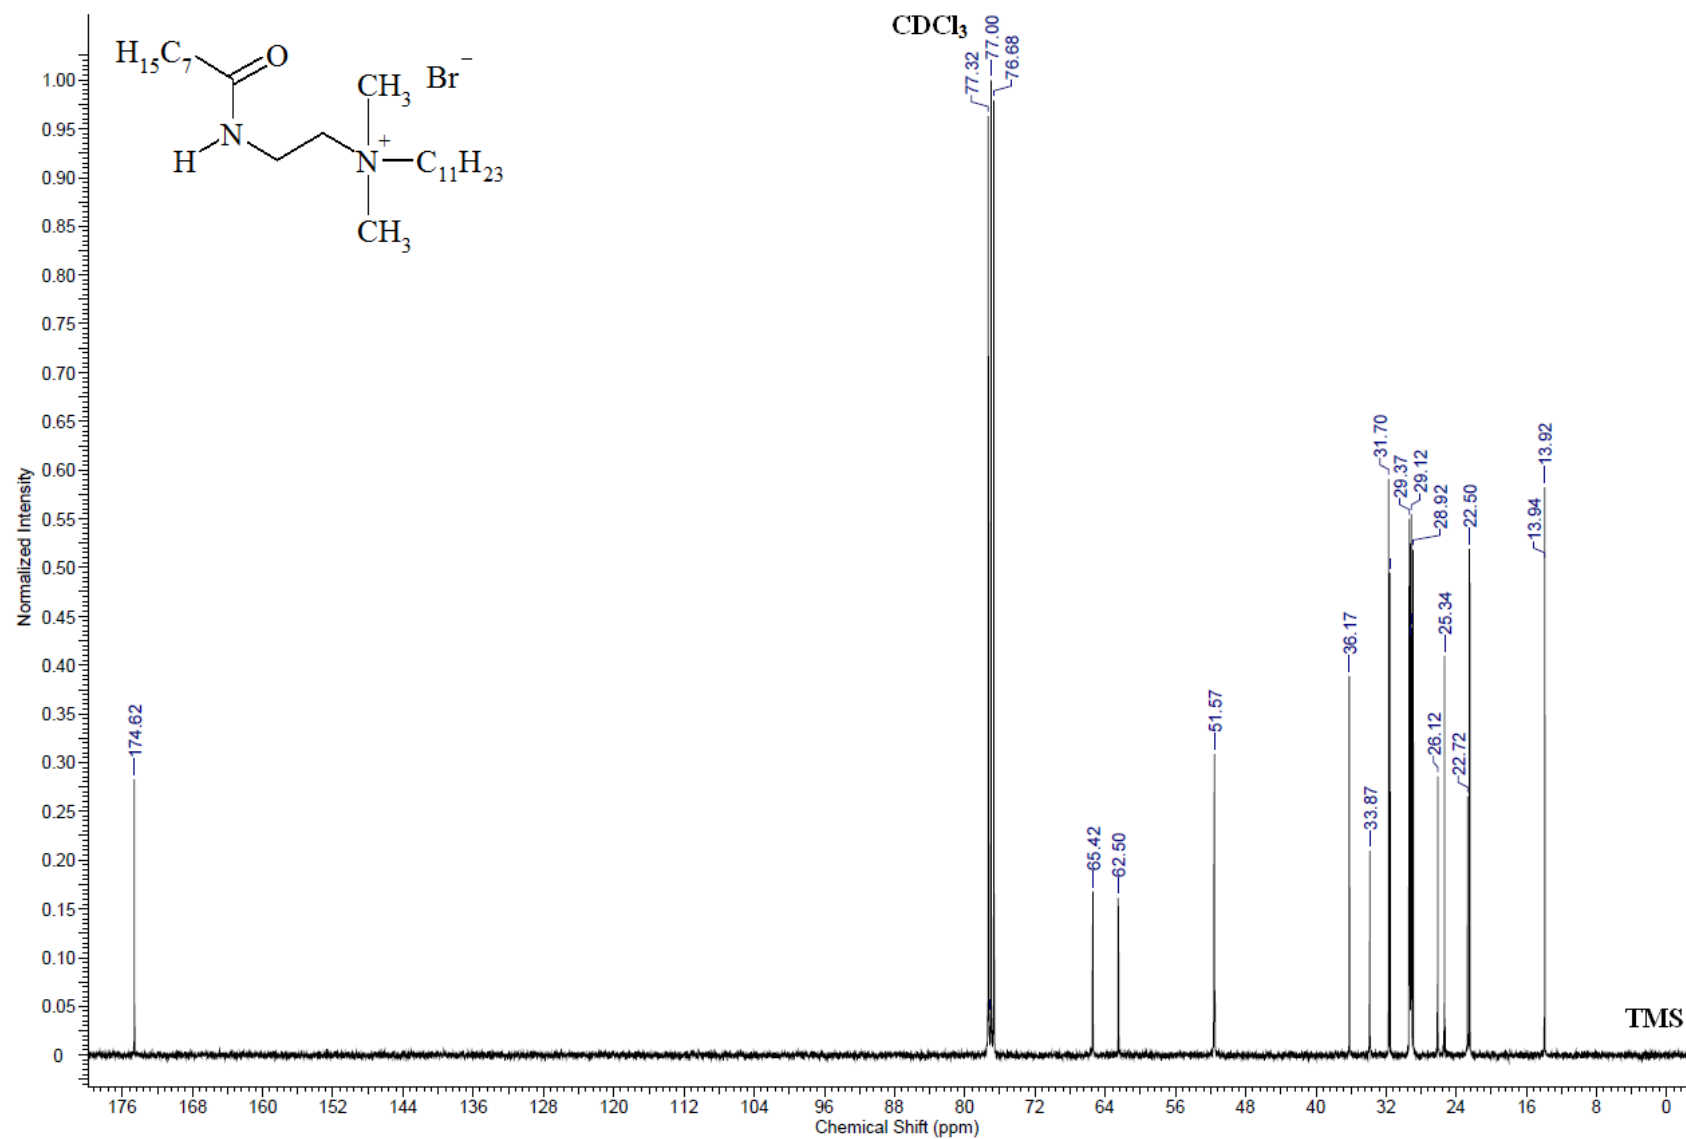

**Fig. S12.**  $^{13}\text{C}$  NMR spectrum of dimethyl-*N*-[(2-octanamido)ethyl]undecylammonium bromide (AC11).

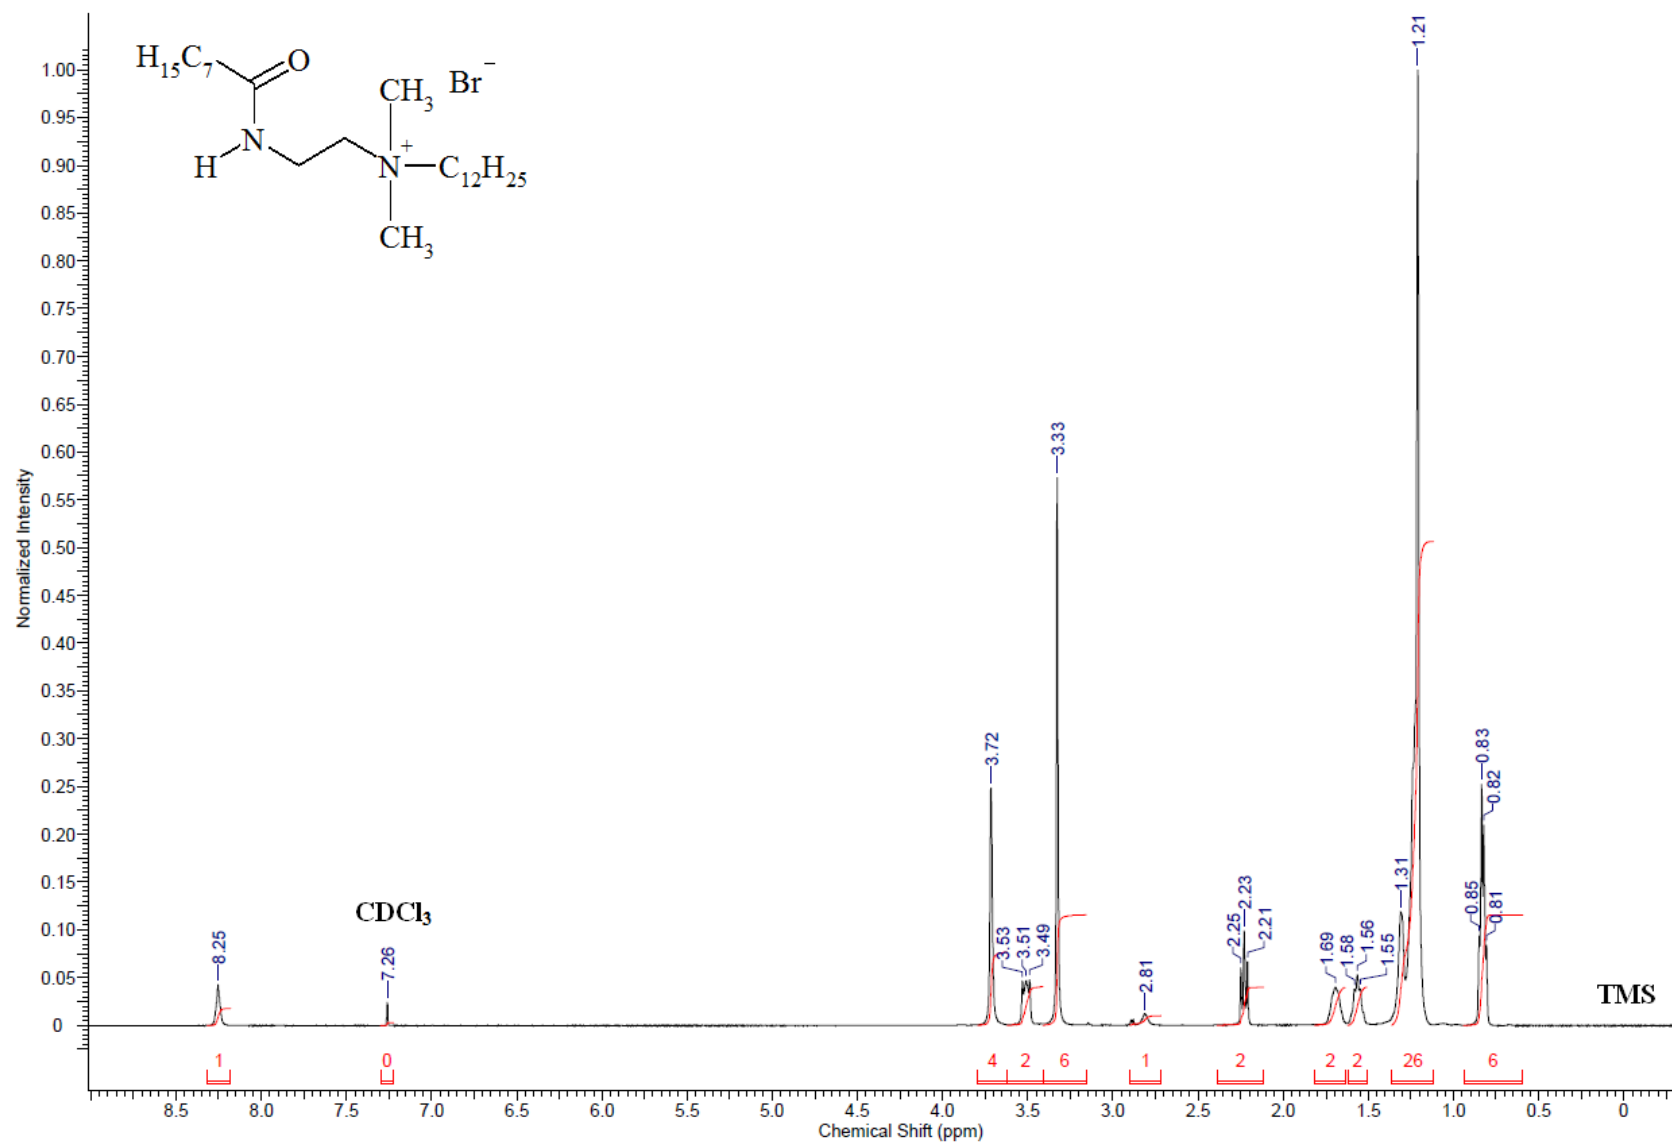

**Fig. S13.**  $^1\text{H}$  NMR spectrum of dodecyldimethyl-*N*-[(2-octanamido)ethyl]ammonium bromide (**AC12**).

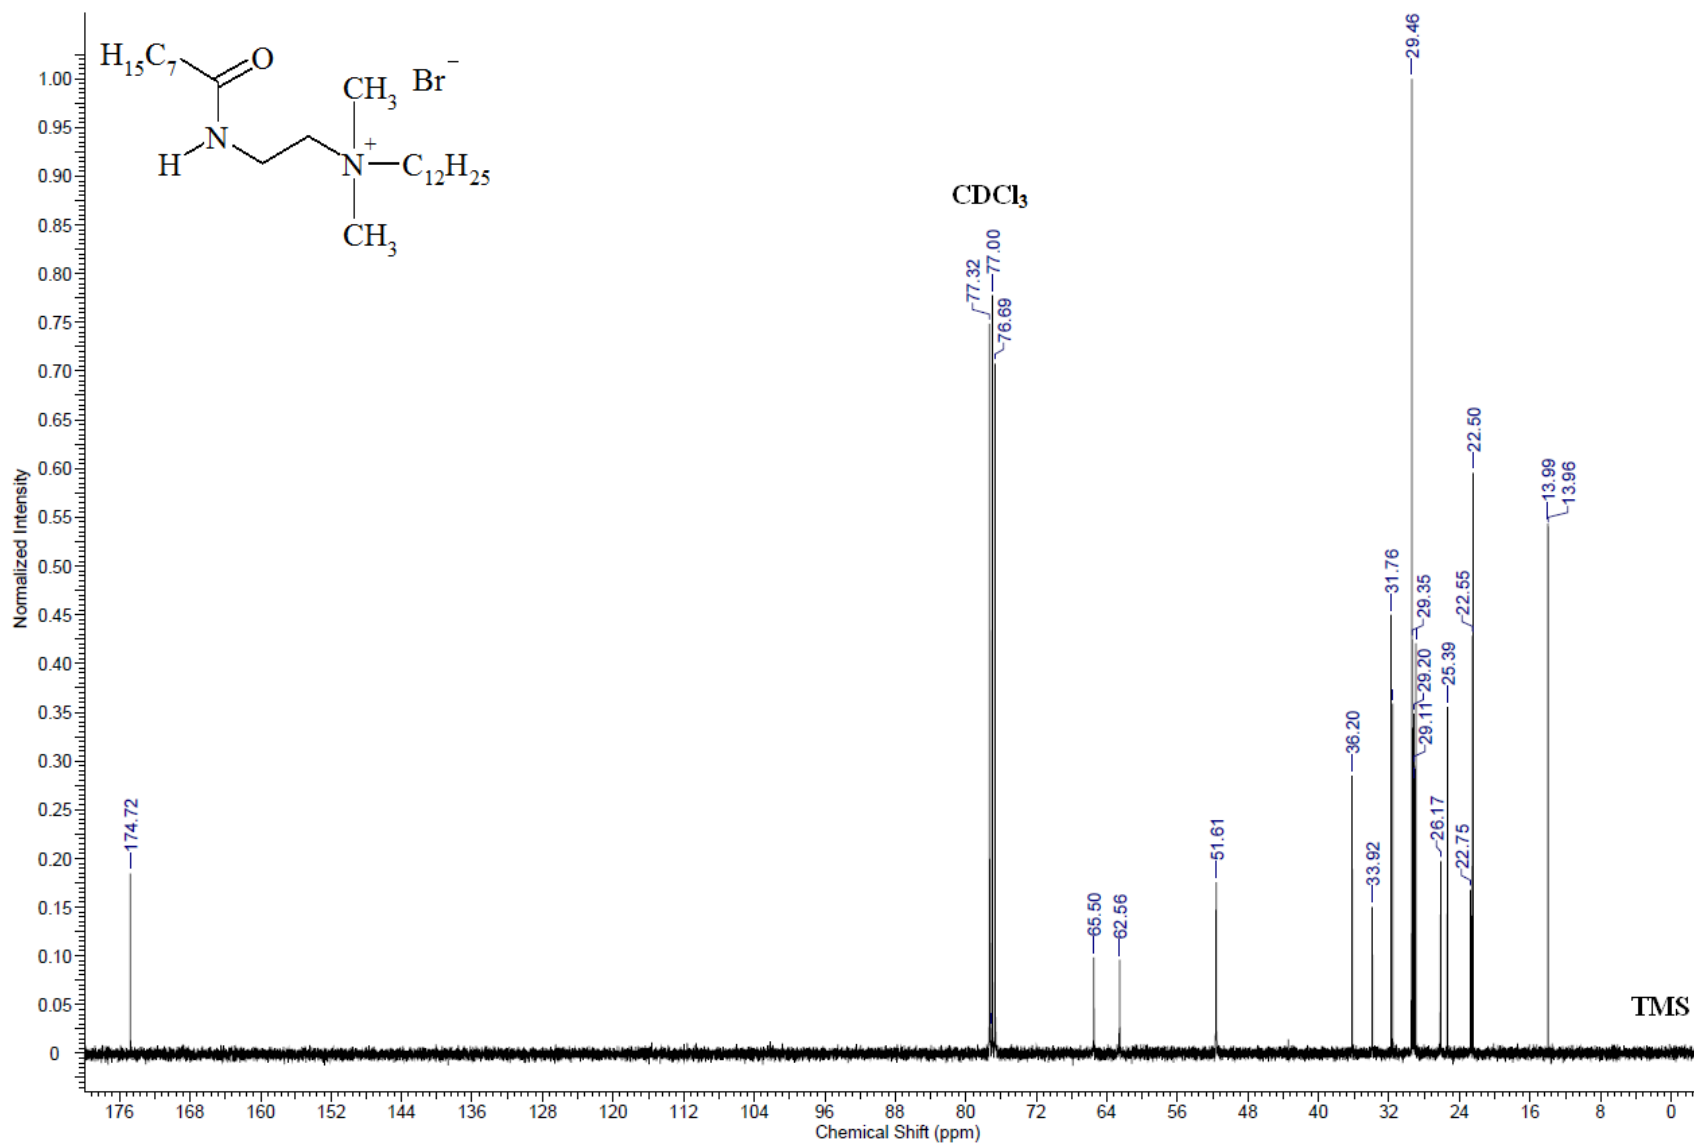

Fig. S14. <sup>13</sup>C NMR spectrum of dodecyldimethyl-N-[(2-octanamido)ethyl]ammonium bromide (AC12).



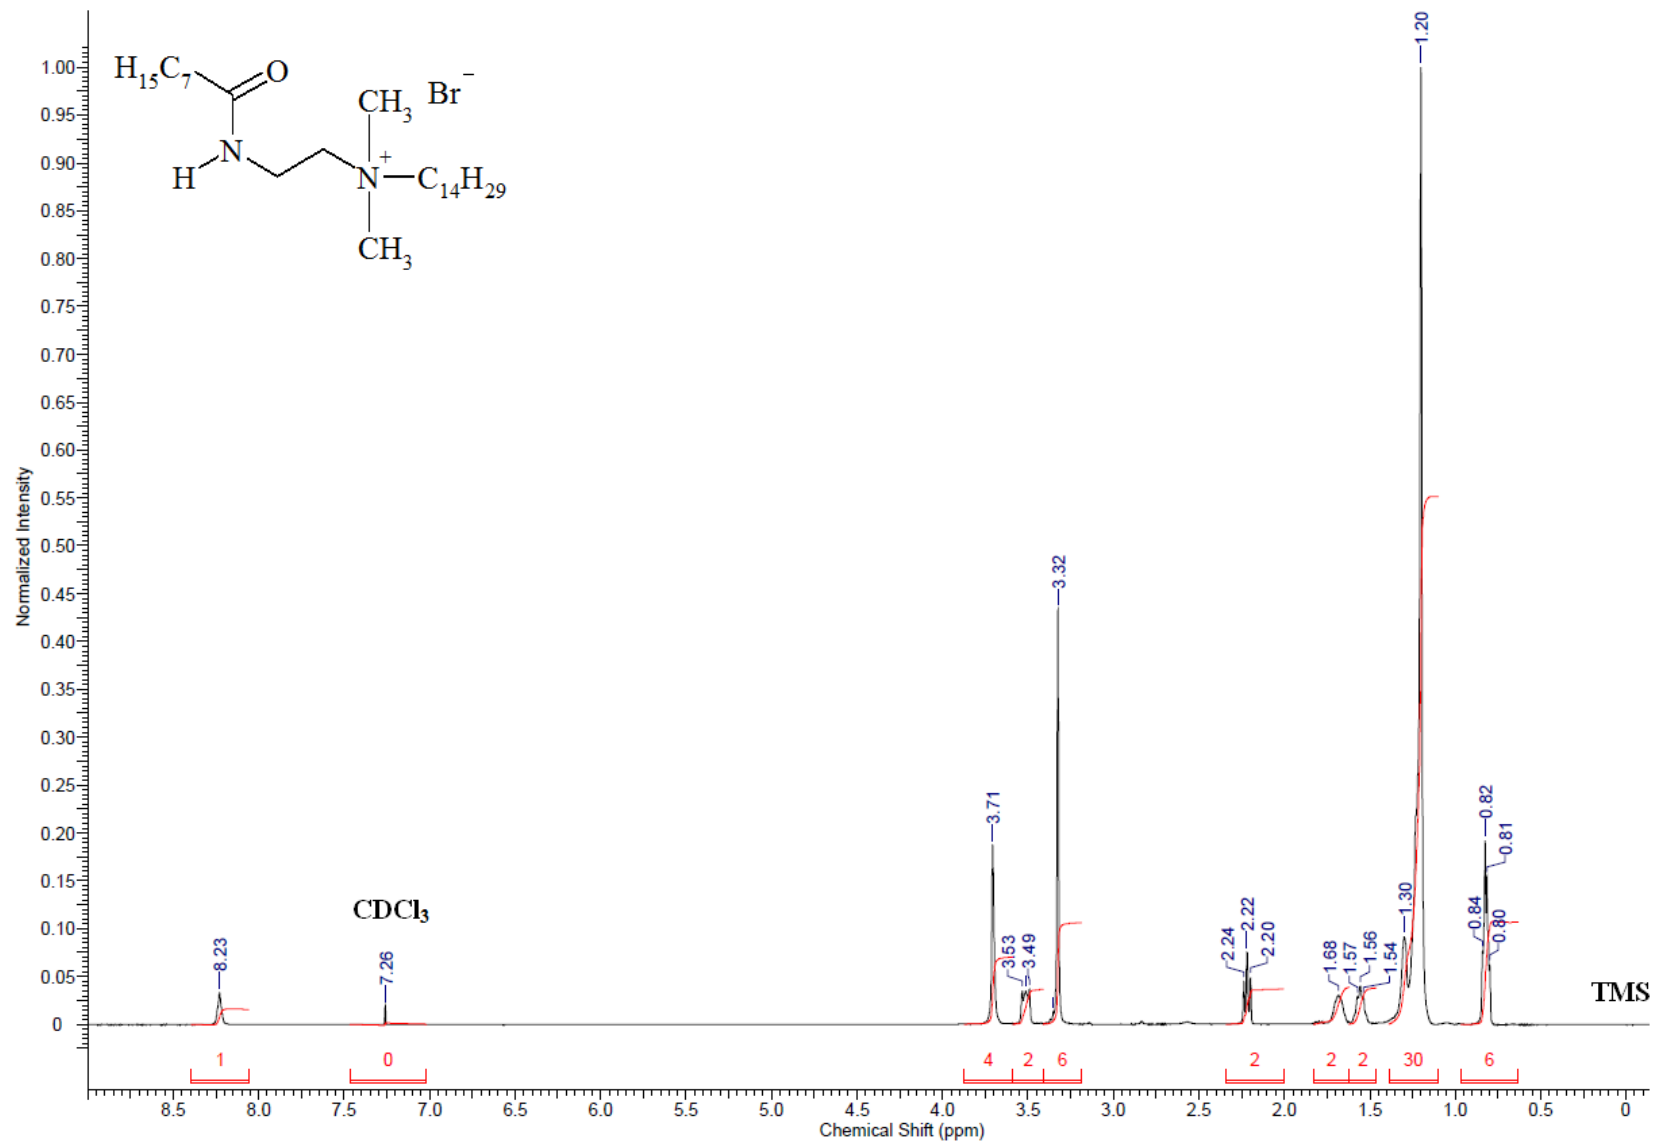

**Fig. S15.** <sup>1</sup>H NMR spectrum of dimethyl-*N*-[(2-octanamido)ethyl]tetradecylammonium bromide (AC14).

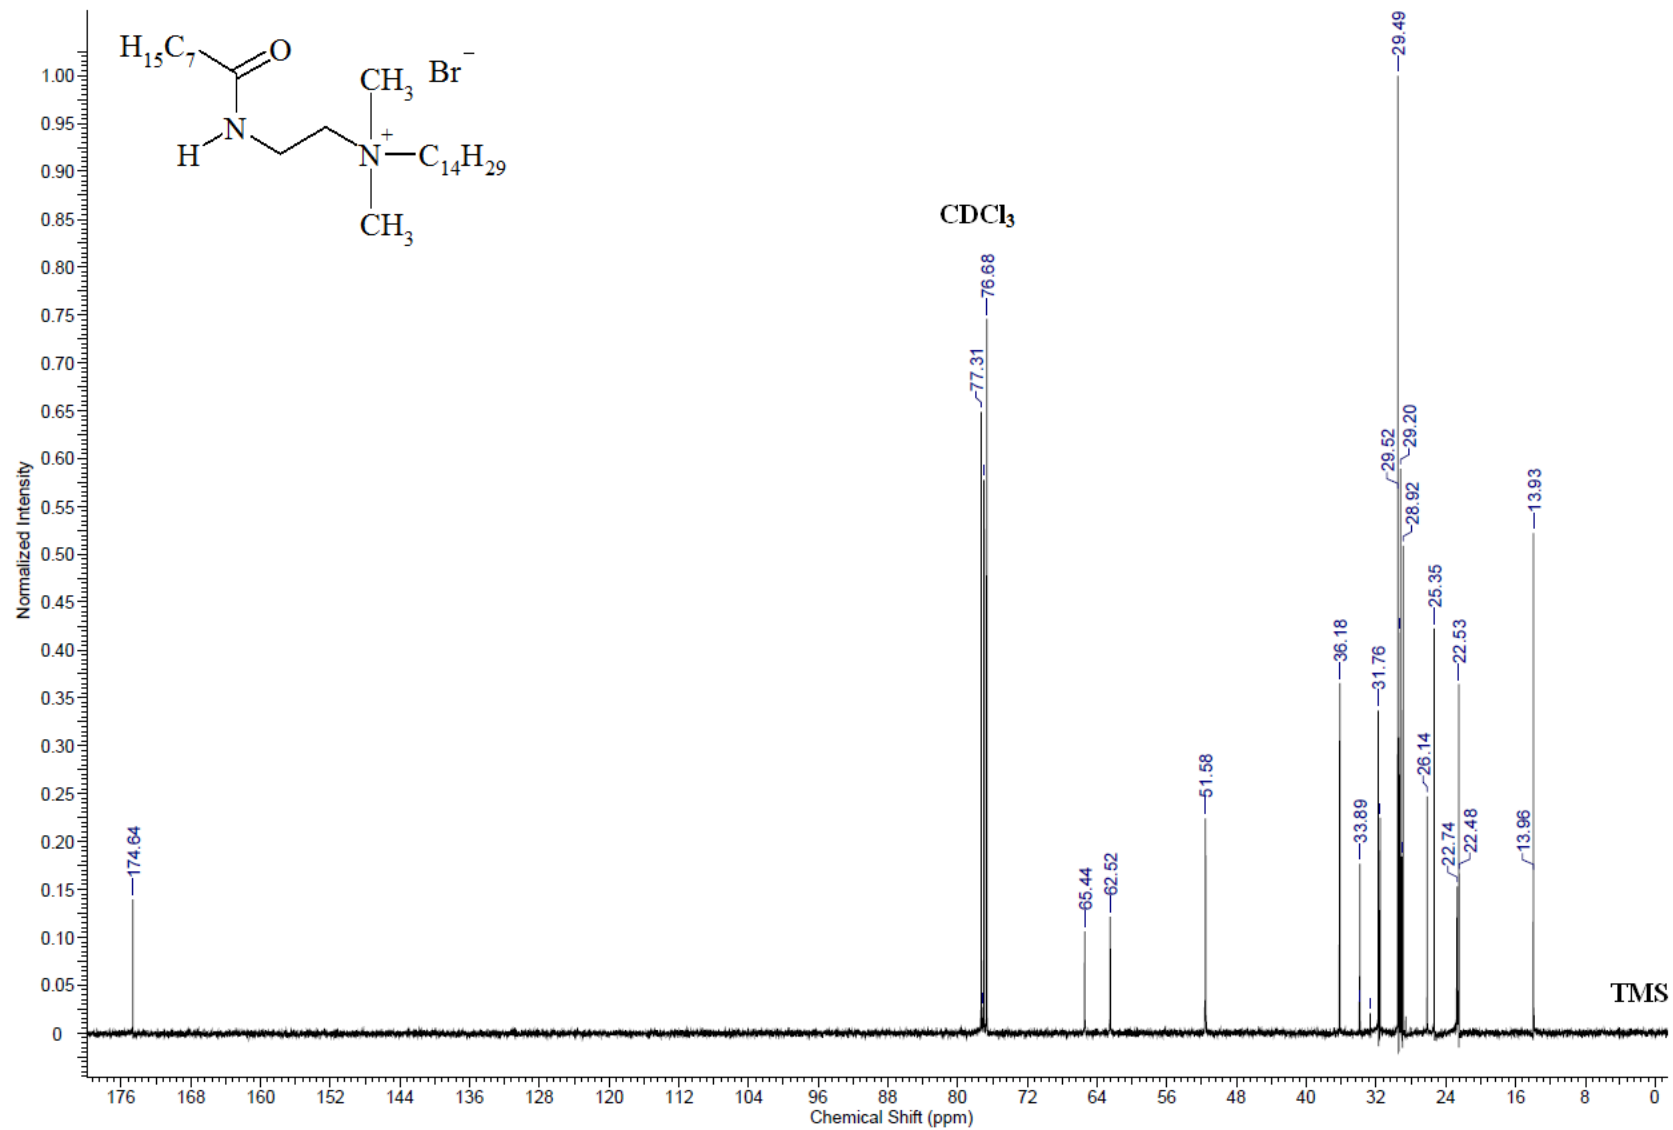

**Fig. S16.**  $^{13}\text{C}$  NMR spectrum of dimethyl-*N*-[(2-octanamido)ethyl]tetradecylammonium bromide (**AC14**).

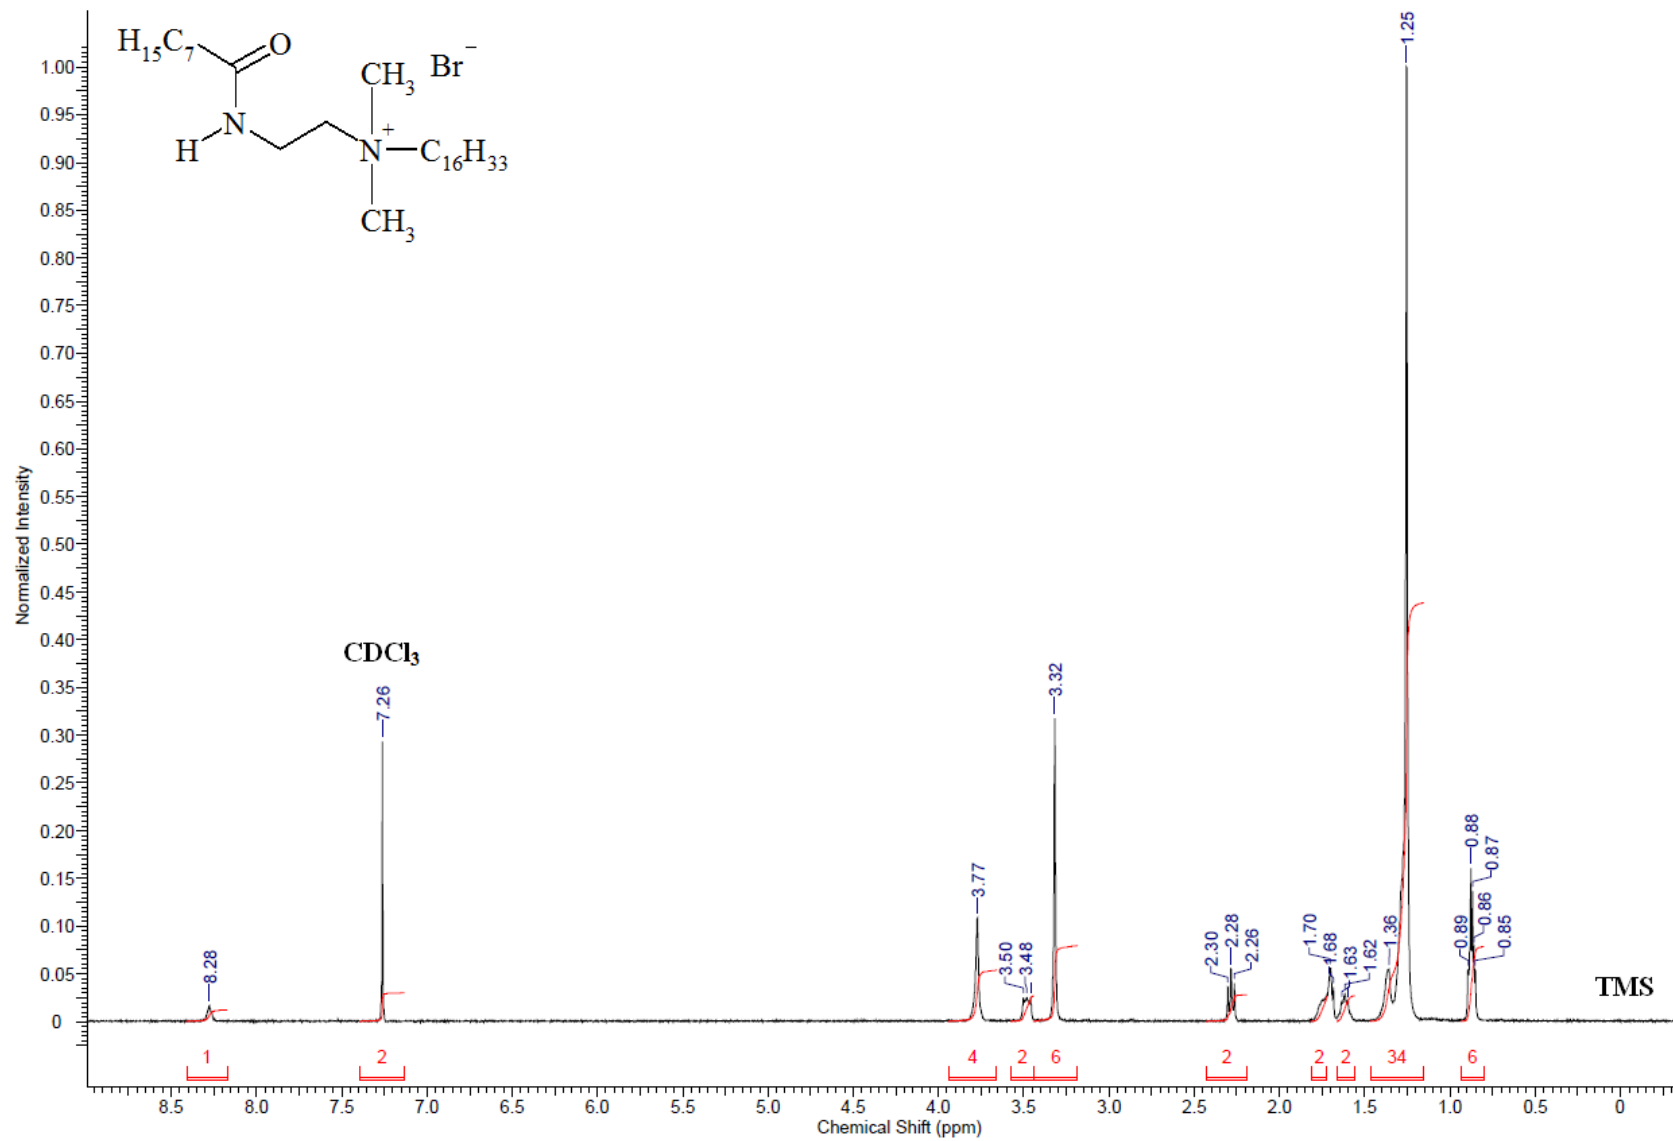

**Fig. S17.**  $^1\text{H}$  NMR spectrum of hexadecyldimethyl-*N*-[(2-octanamido)ethyl]ammonium bromide (**AC16**).

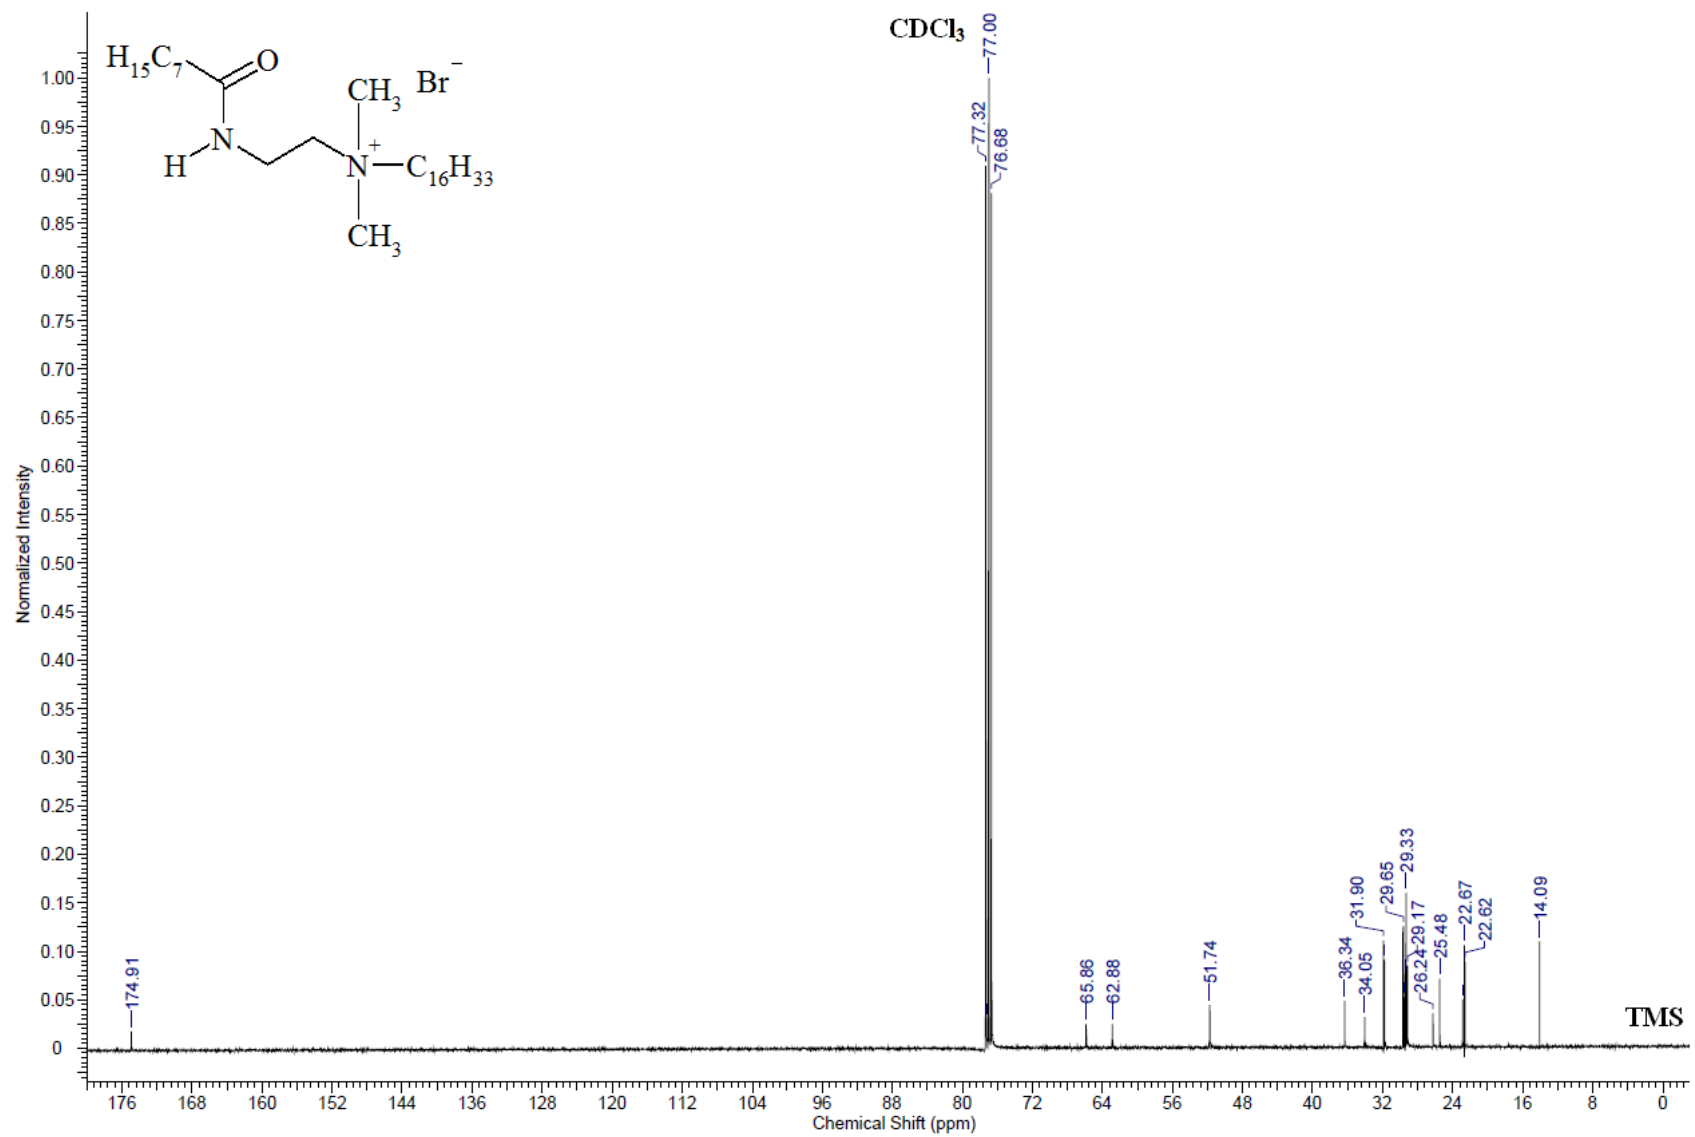

**Fig. S18.**  $^{13}\text{C}$  NMR spectrum of hexadecyldimethyl-*N*-[(2-octanamido)ethyl]ammonium bromide (**AC16**).

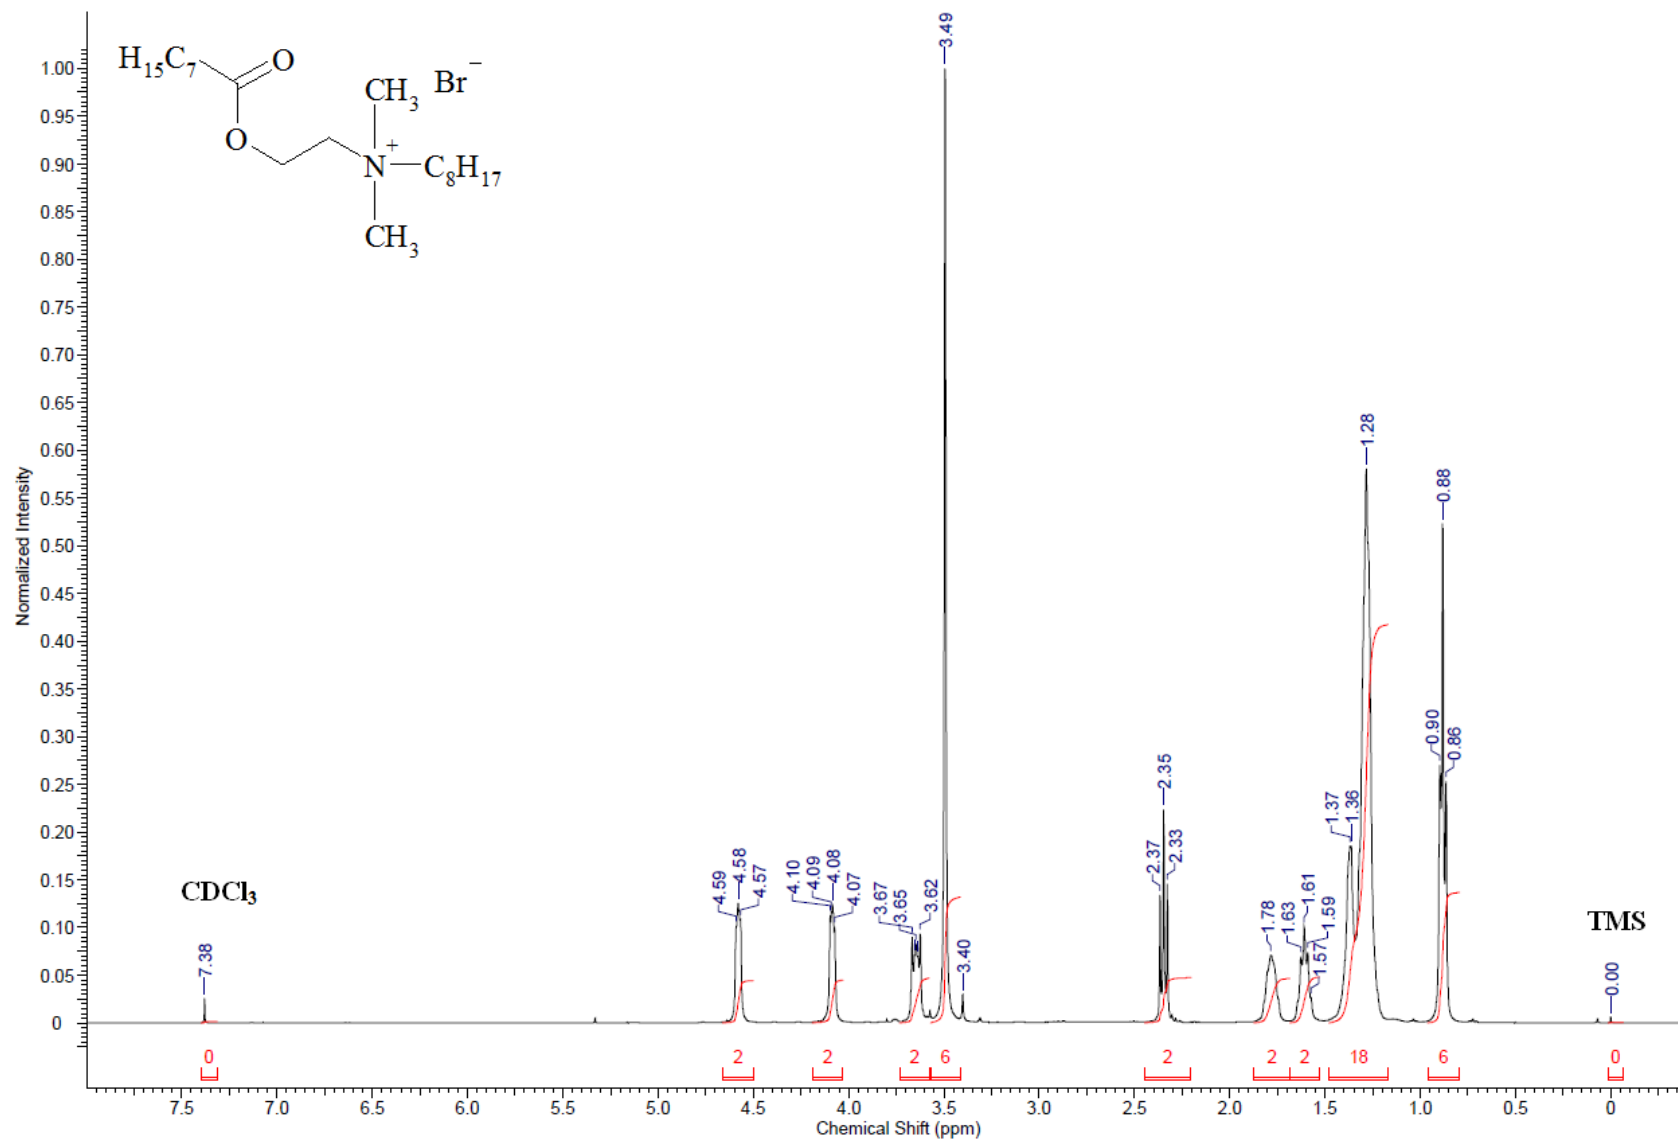

Fig. S19.  $^1\text{H}$  NMR spectrum of dimethyl-2-octanoyloxyethylammonium bromide (EC8).

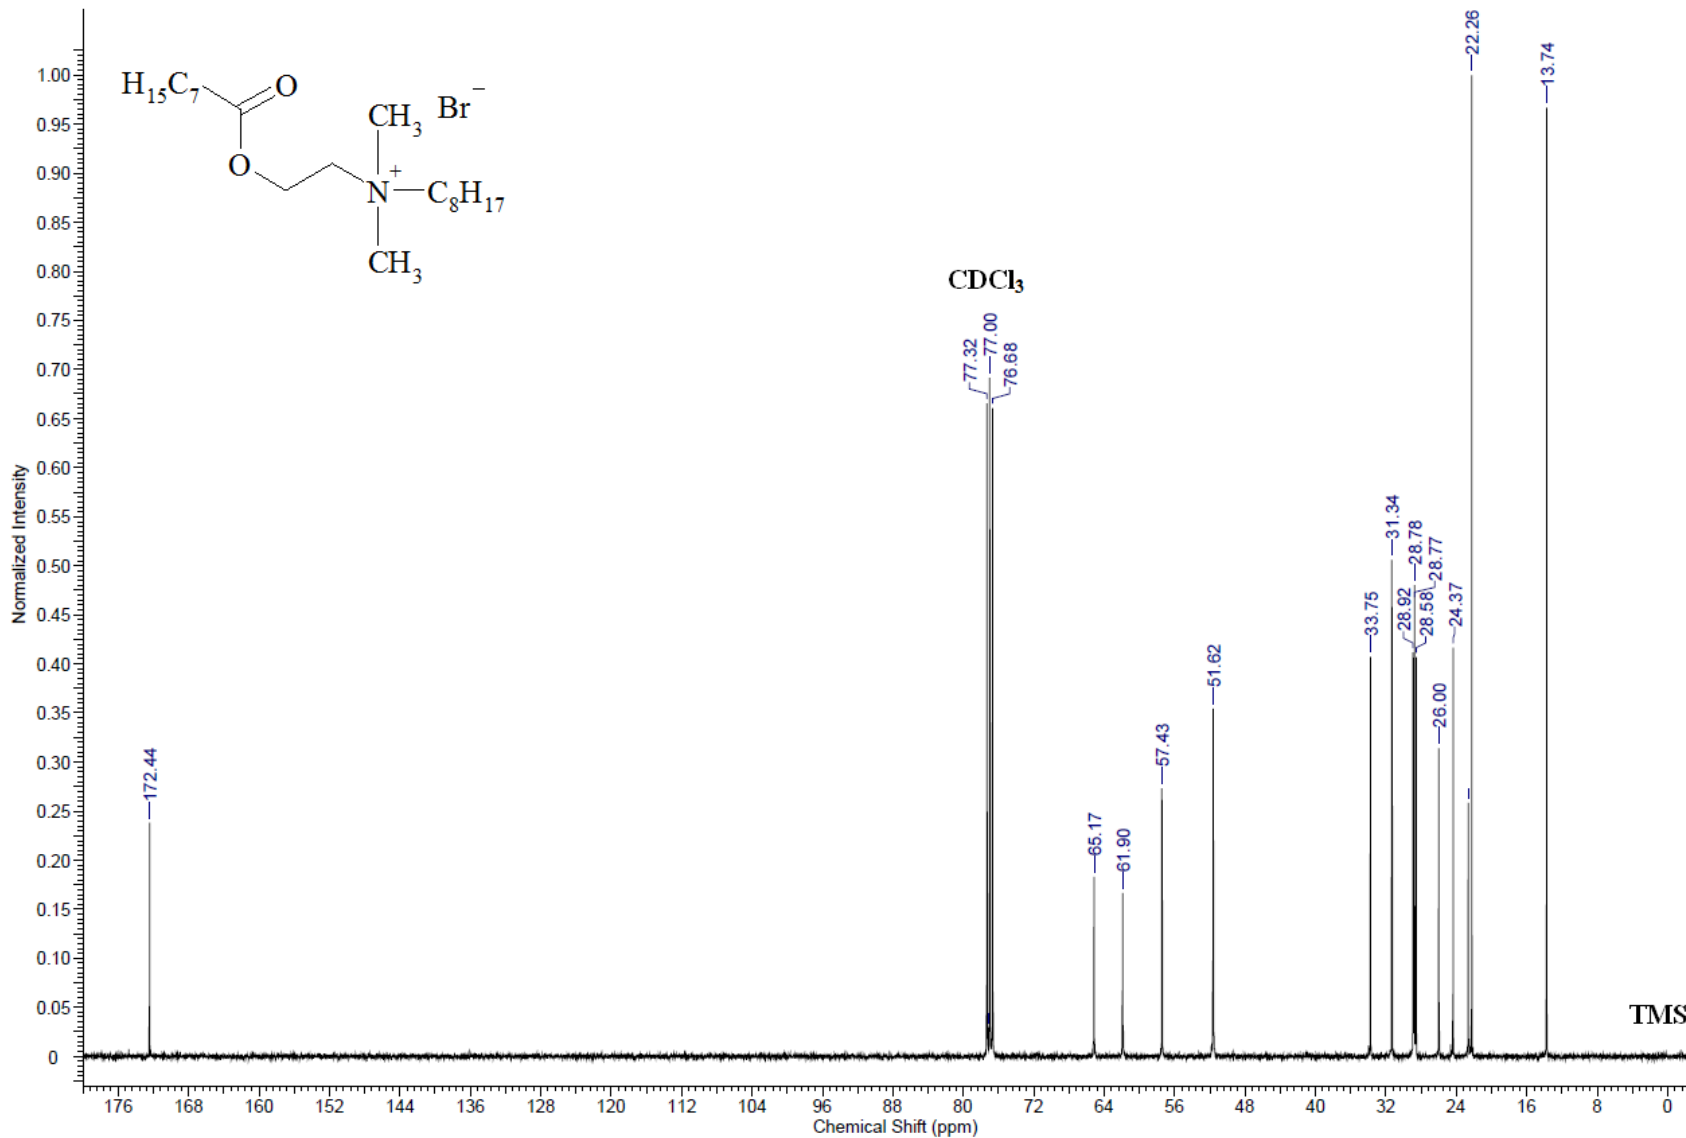

**Fig. S20.**  $^{13}\text{C}$  NMR spectrum of dimethyl-2-octanoyloxyethyloctylammonium bromide (EC8).

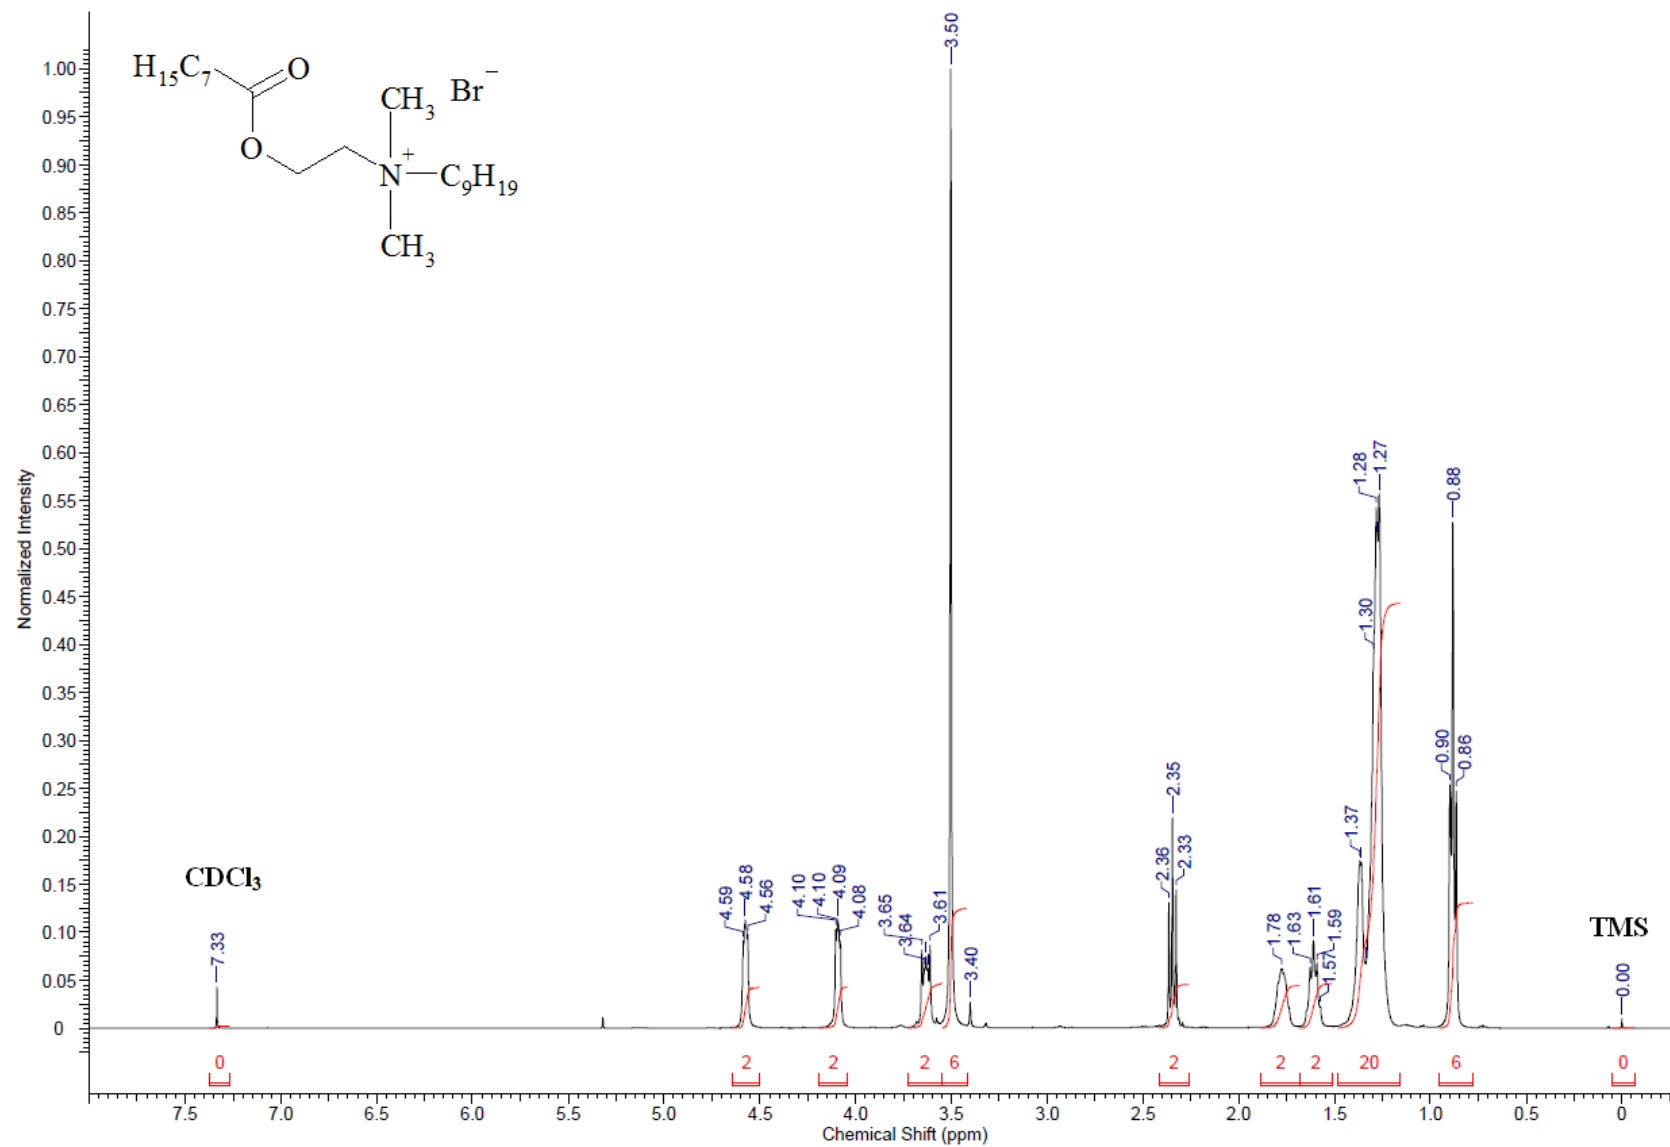

Fig. S21.  $^1\text{H}$  NMR spectrum of dimethylnonyl-2-octanoyloxyethylammonium bromide (EC9).

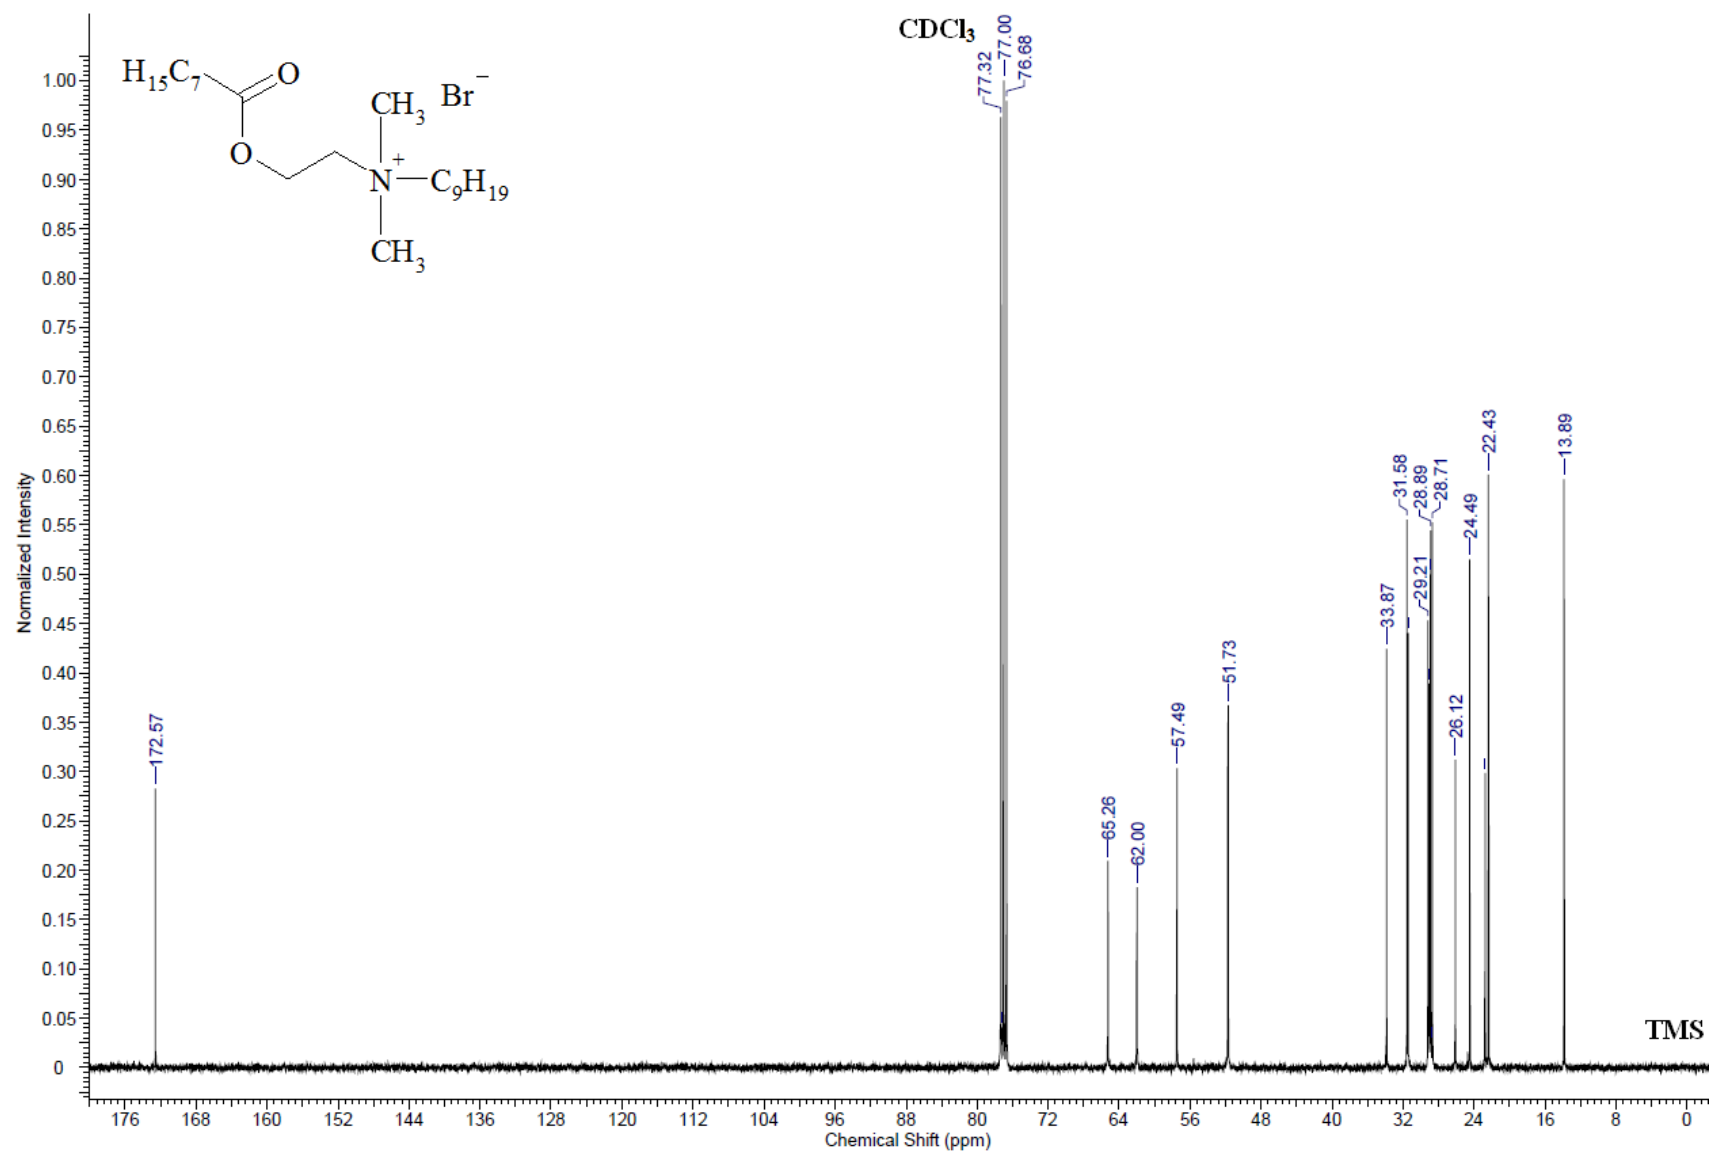

**Fig. S22.**  $^{13}\text{C}$  NMR spectrum of dimethylnonyl-2-octanoyloxyethylammonium bromide (EC9).



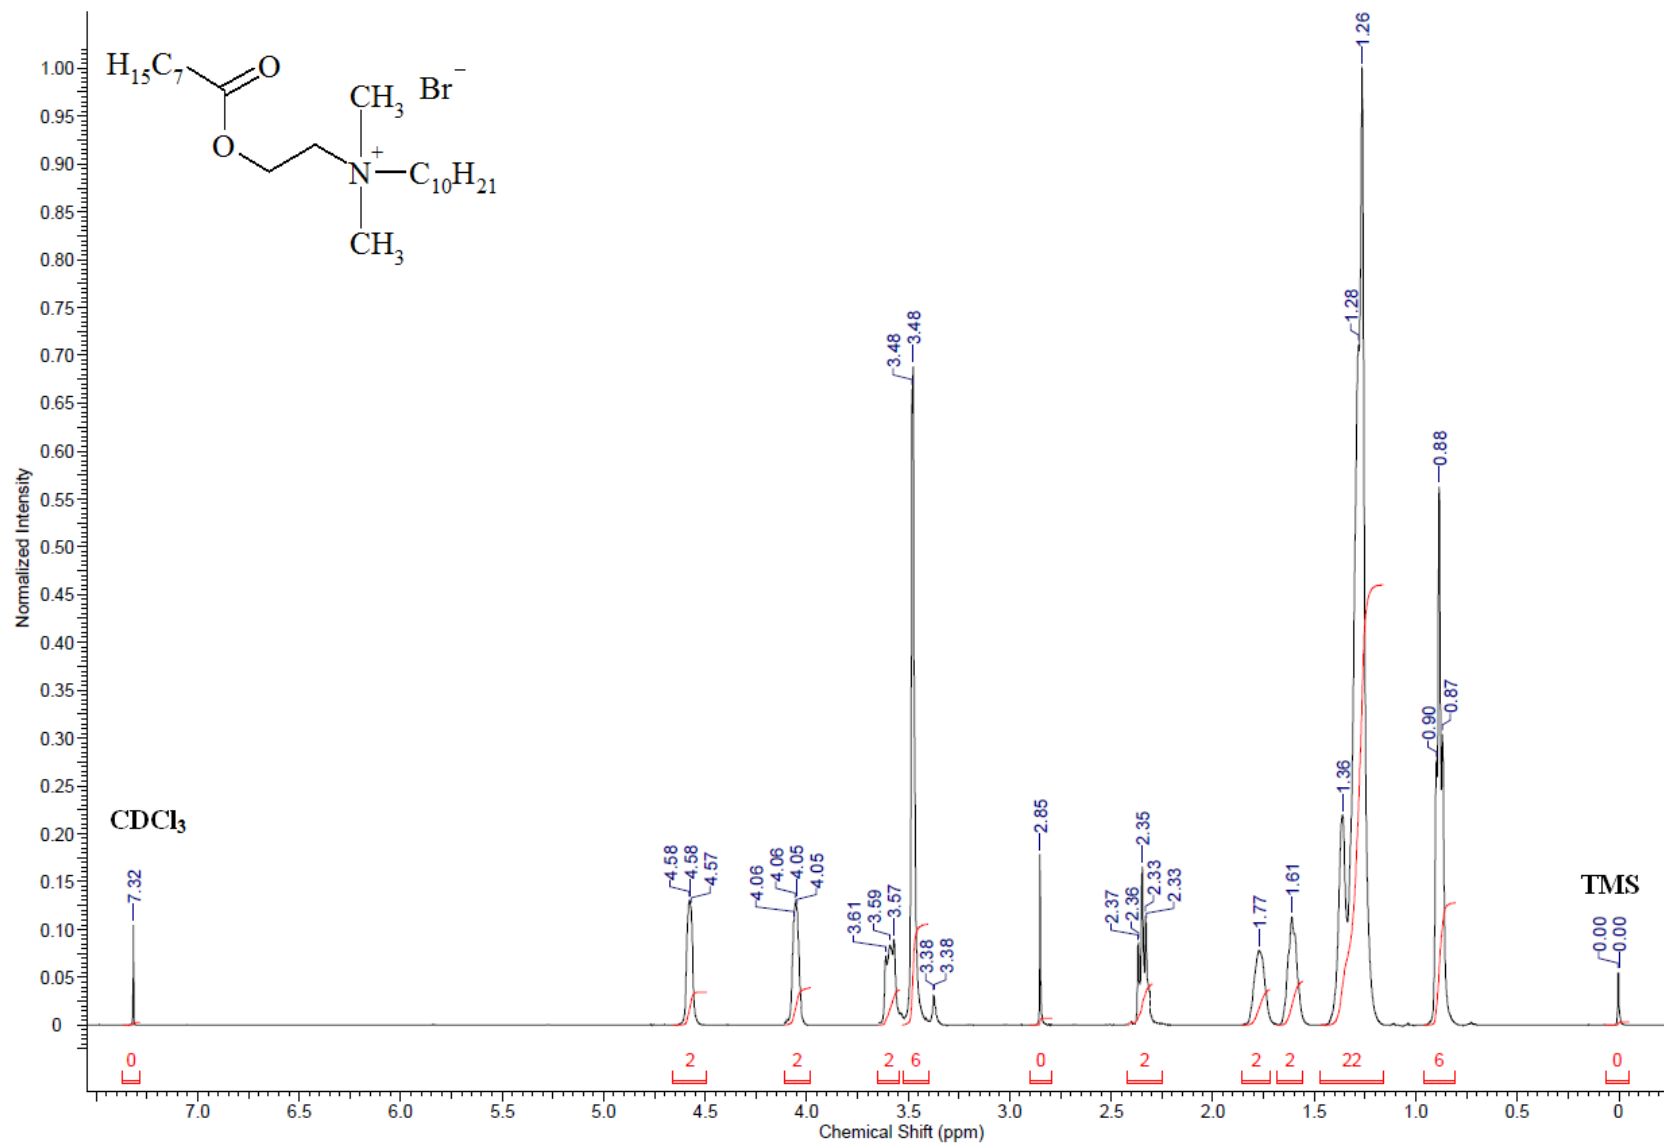

**Fig. S23.** <sup>1</sup>H NMR spectrum of decyldimethyl-2-octanoyloxyethylammonium bromide (EC10).

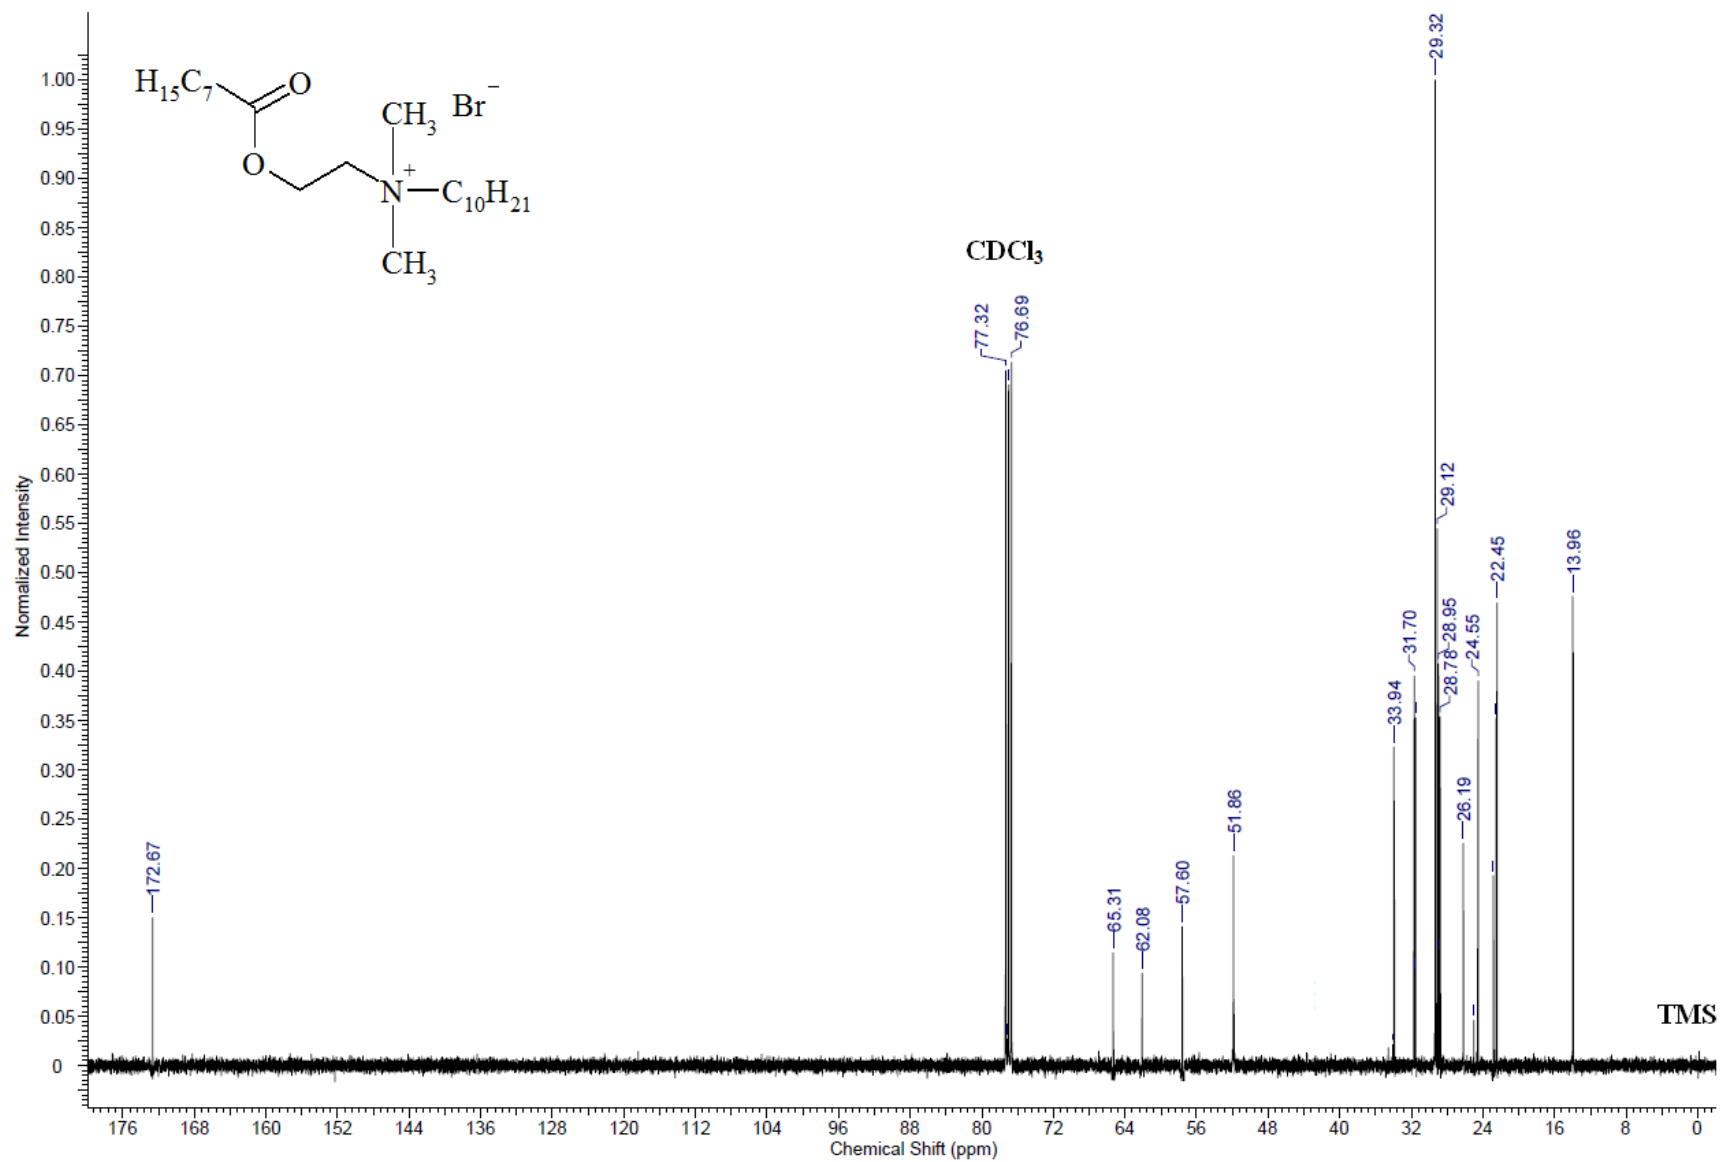

**Fig. S24.**  $^{13}\text{C}$  NMR spectrum of decyldimethyl-2-octanoyloxyethylammonium bromide (EC10).

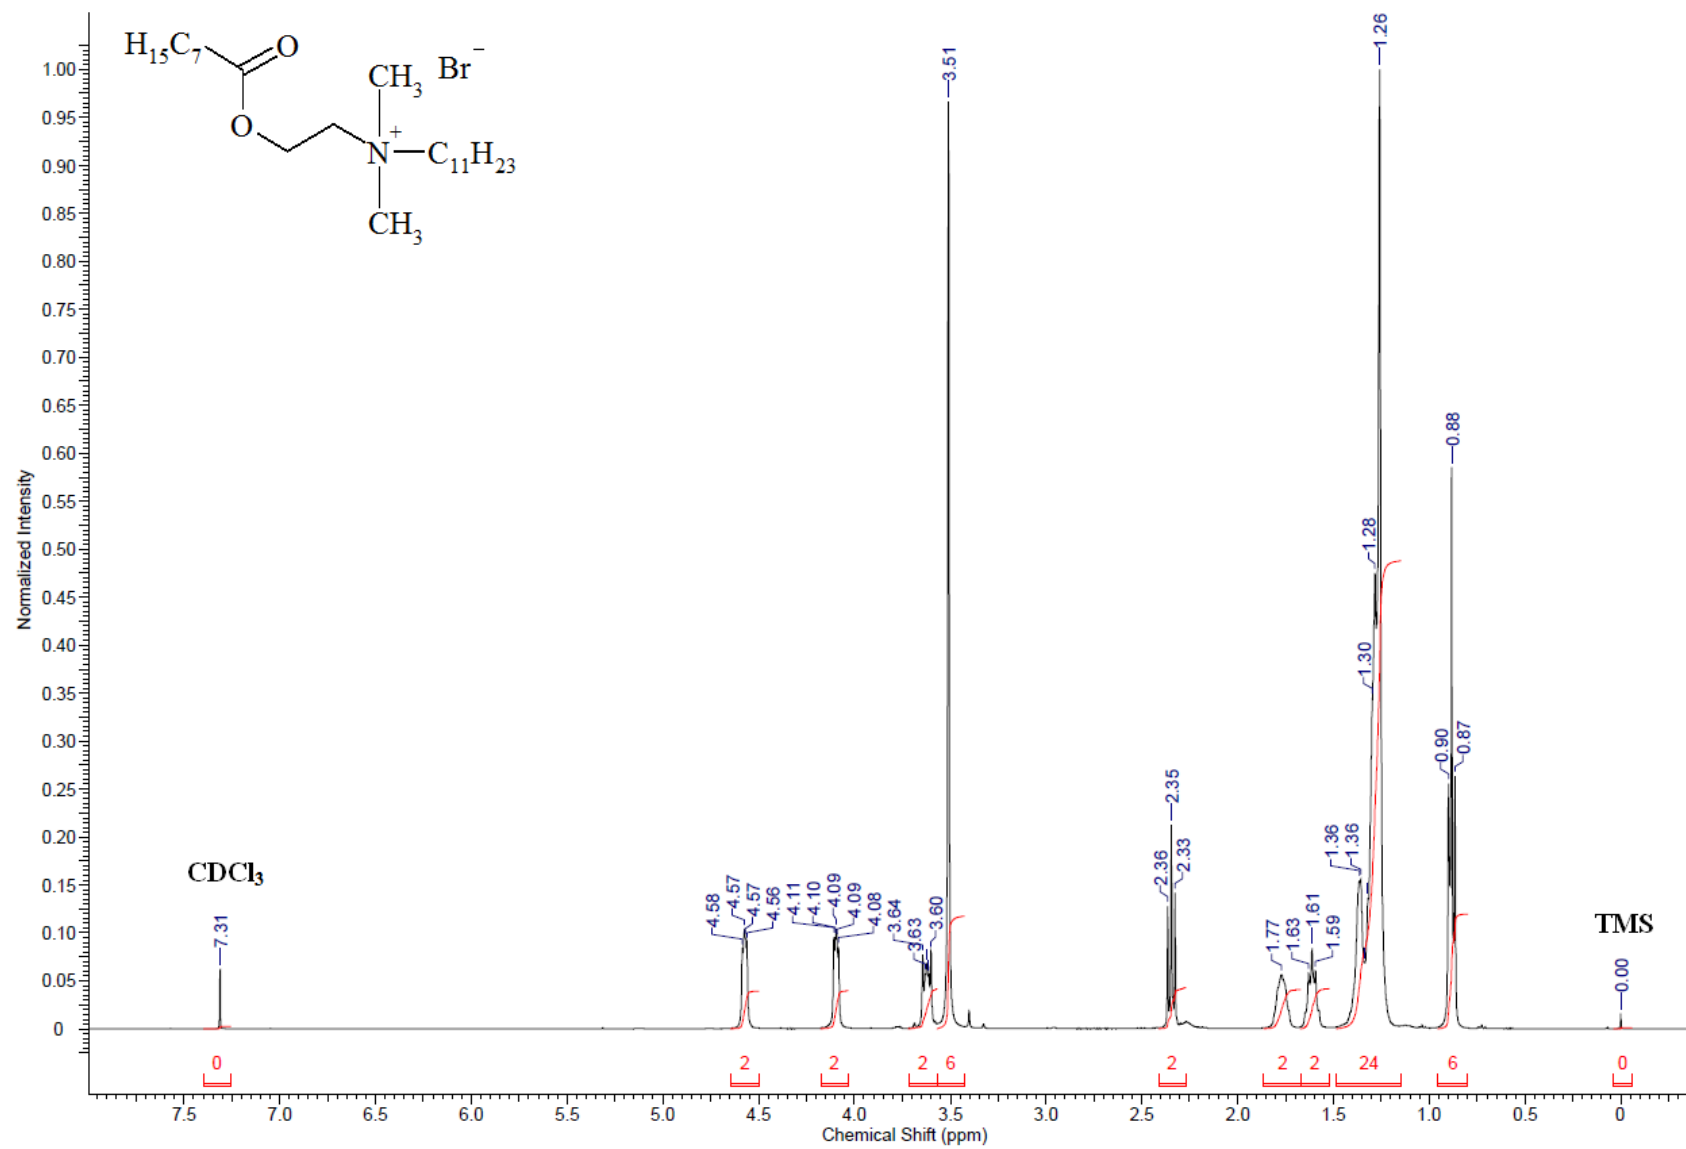

**Fig. S25.**  $^1\text{H}$  NMR spectrum of dimethyl-2-octanoyloxyethylundecylammonium bromide (**EC11**).

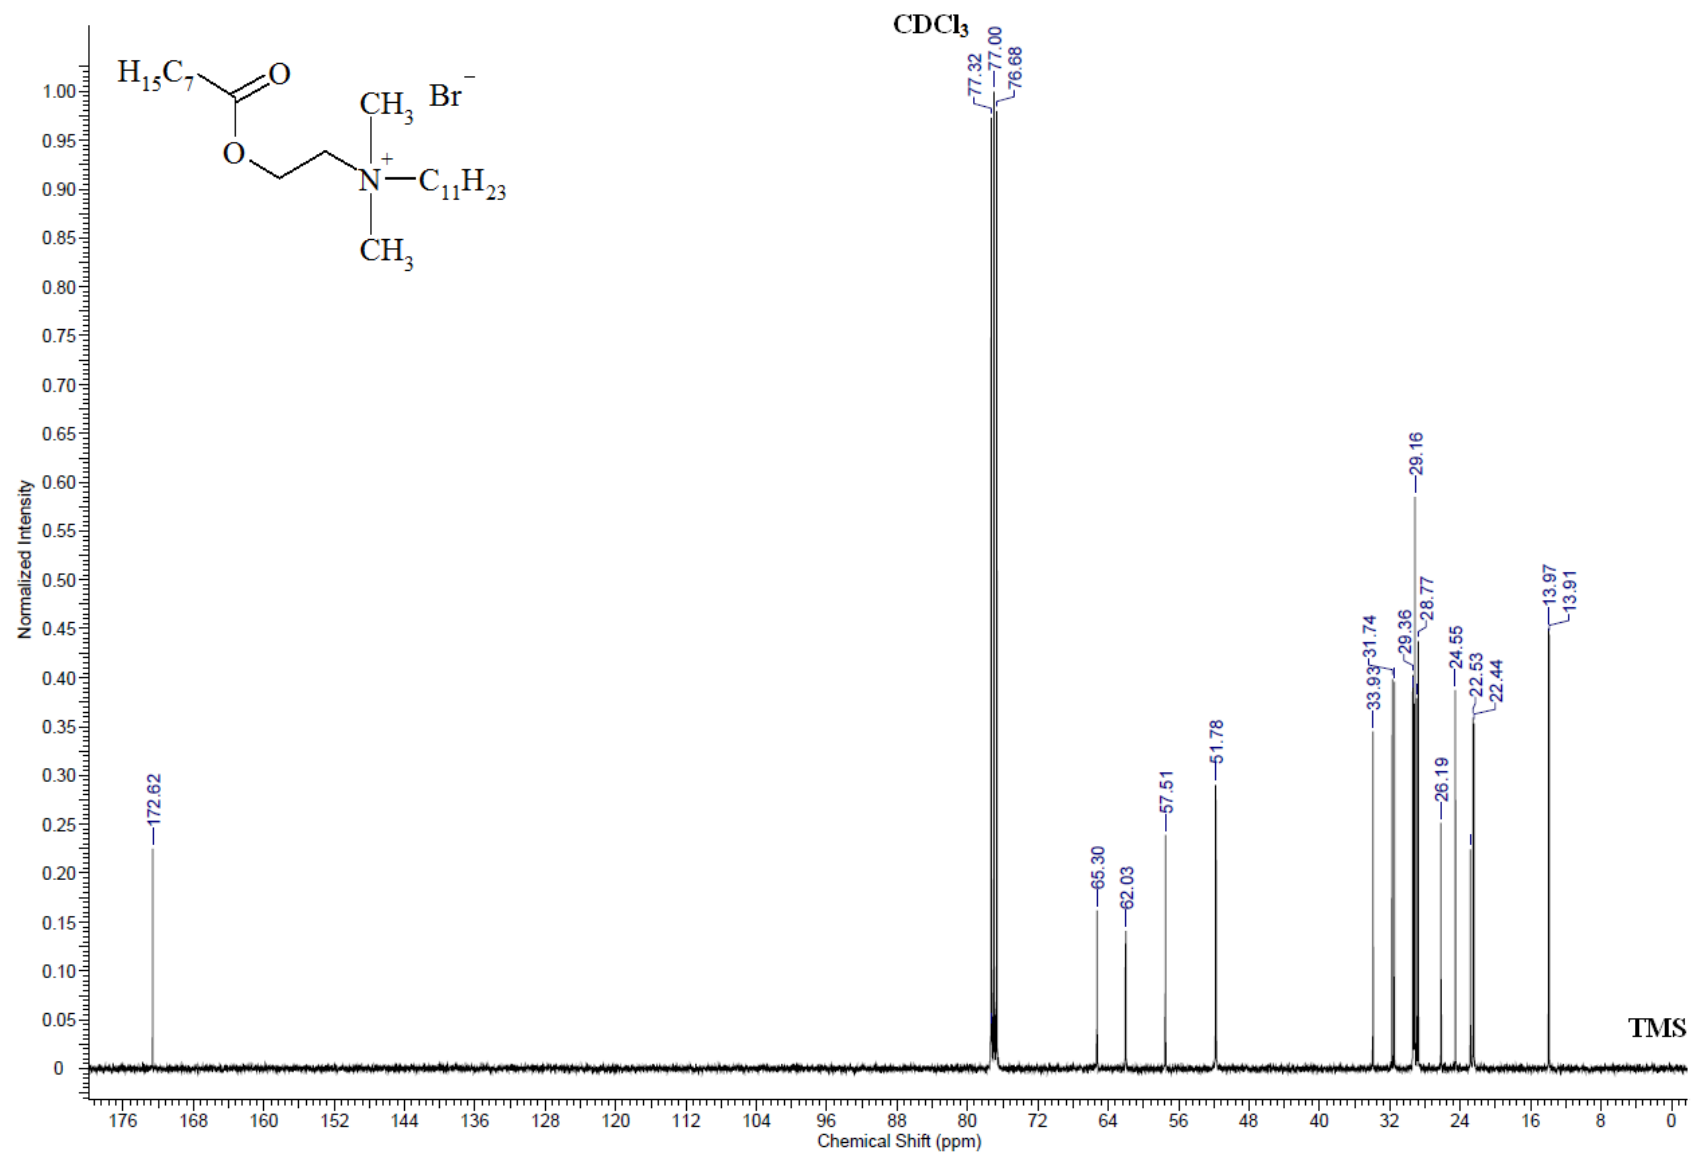

**Fig. S26.**  $^{13}\text{C}$  NMR spectrum of dimethyl-2-octanoyloxyethylundecylammonium bromide (EC11).

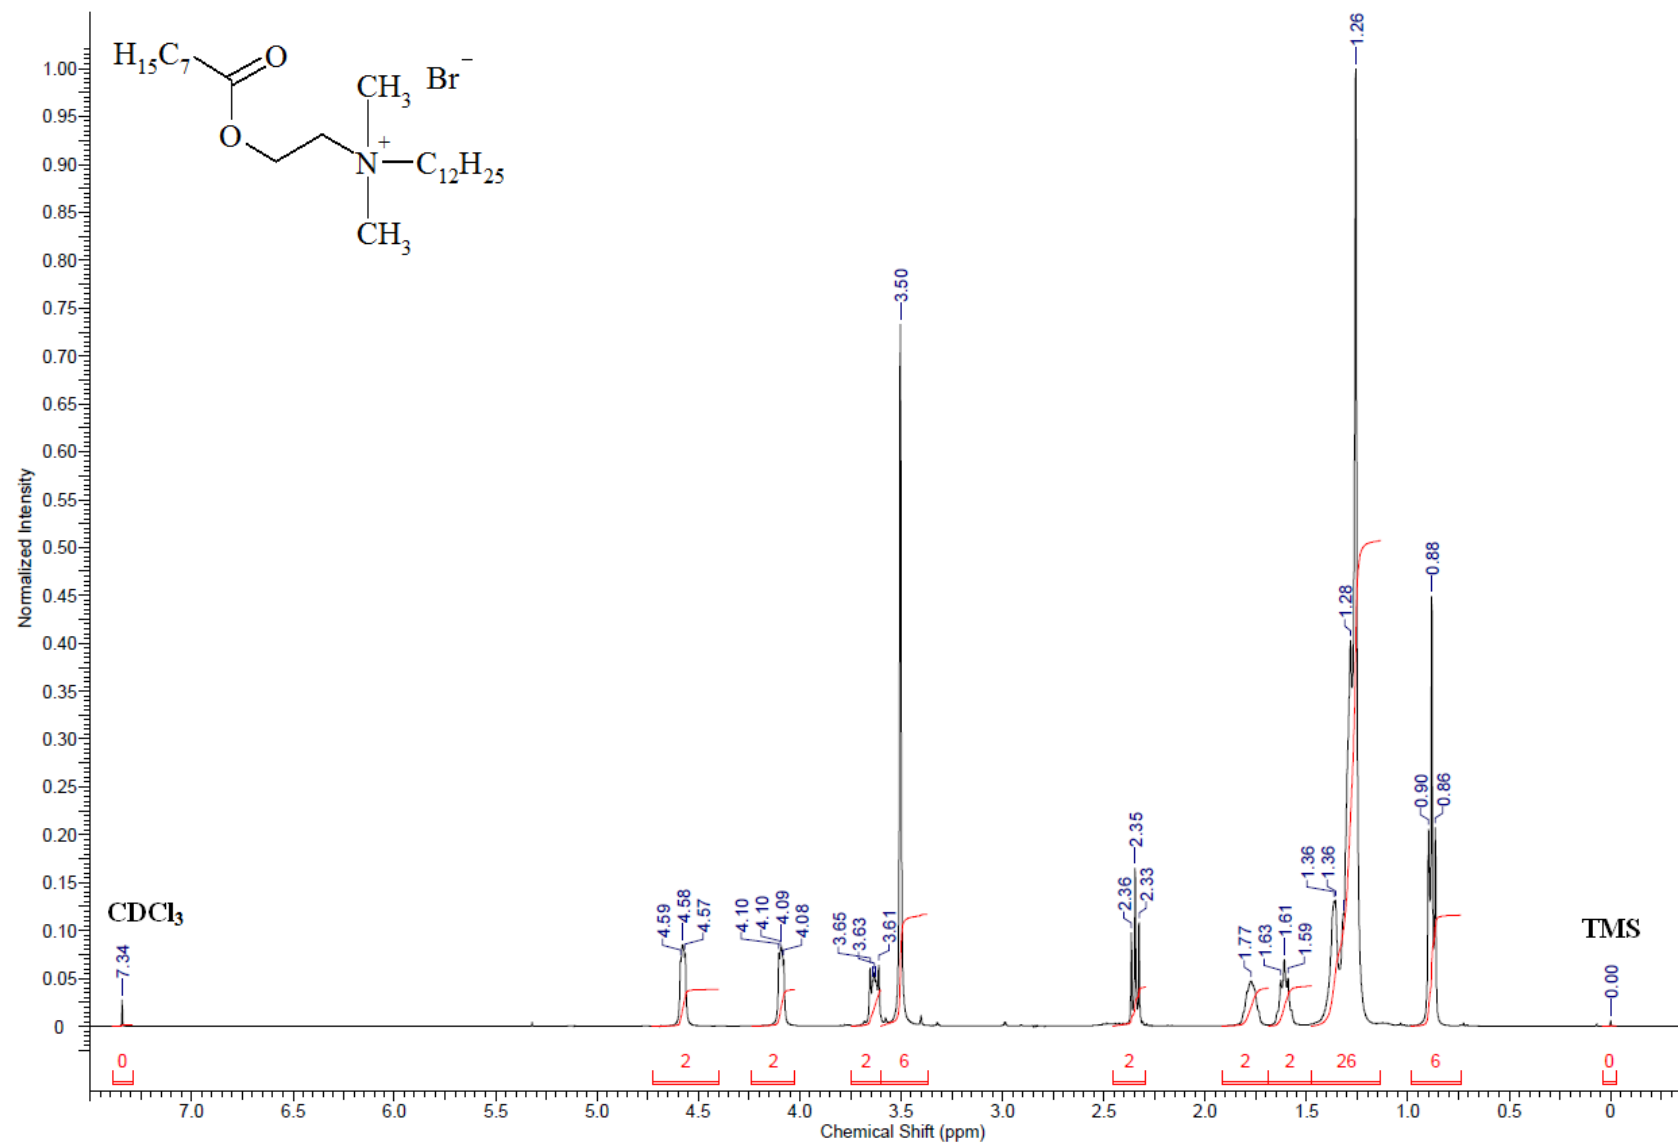

**Fig. S27.**  $^1\text{H}$  NMR spectrum of dodecyldimethyl-2-octanoyloxyethylammonium bromide (EC12).

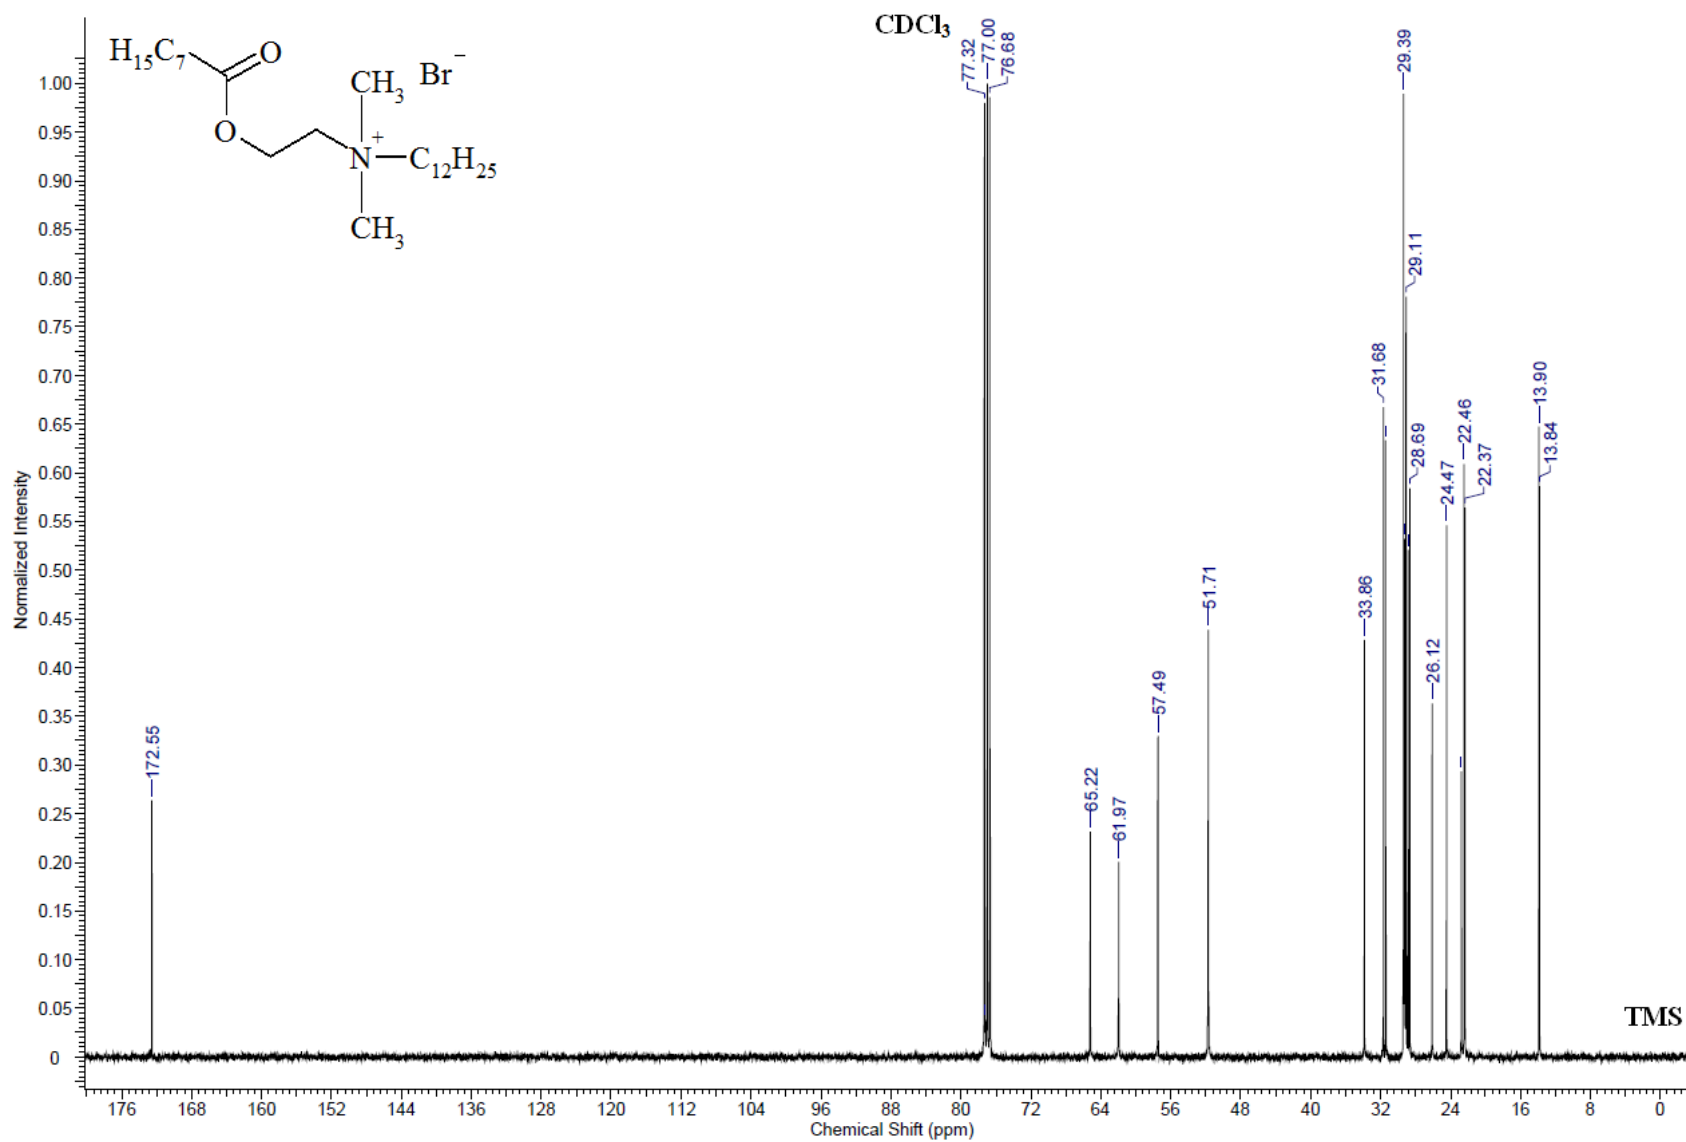

**Fig. S28.**  $^{13}\text{C}$  NMR spectrum of dodecyldimethyl-2-octanoyloxyethylammonium bromide (EC12).

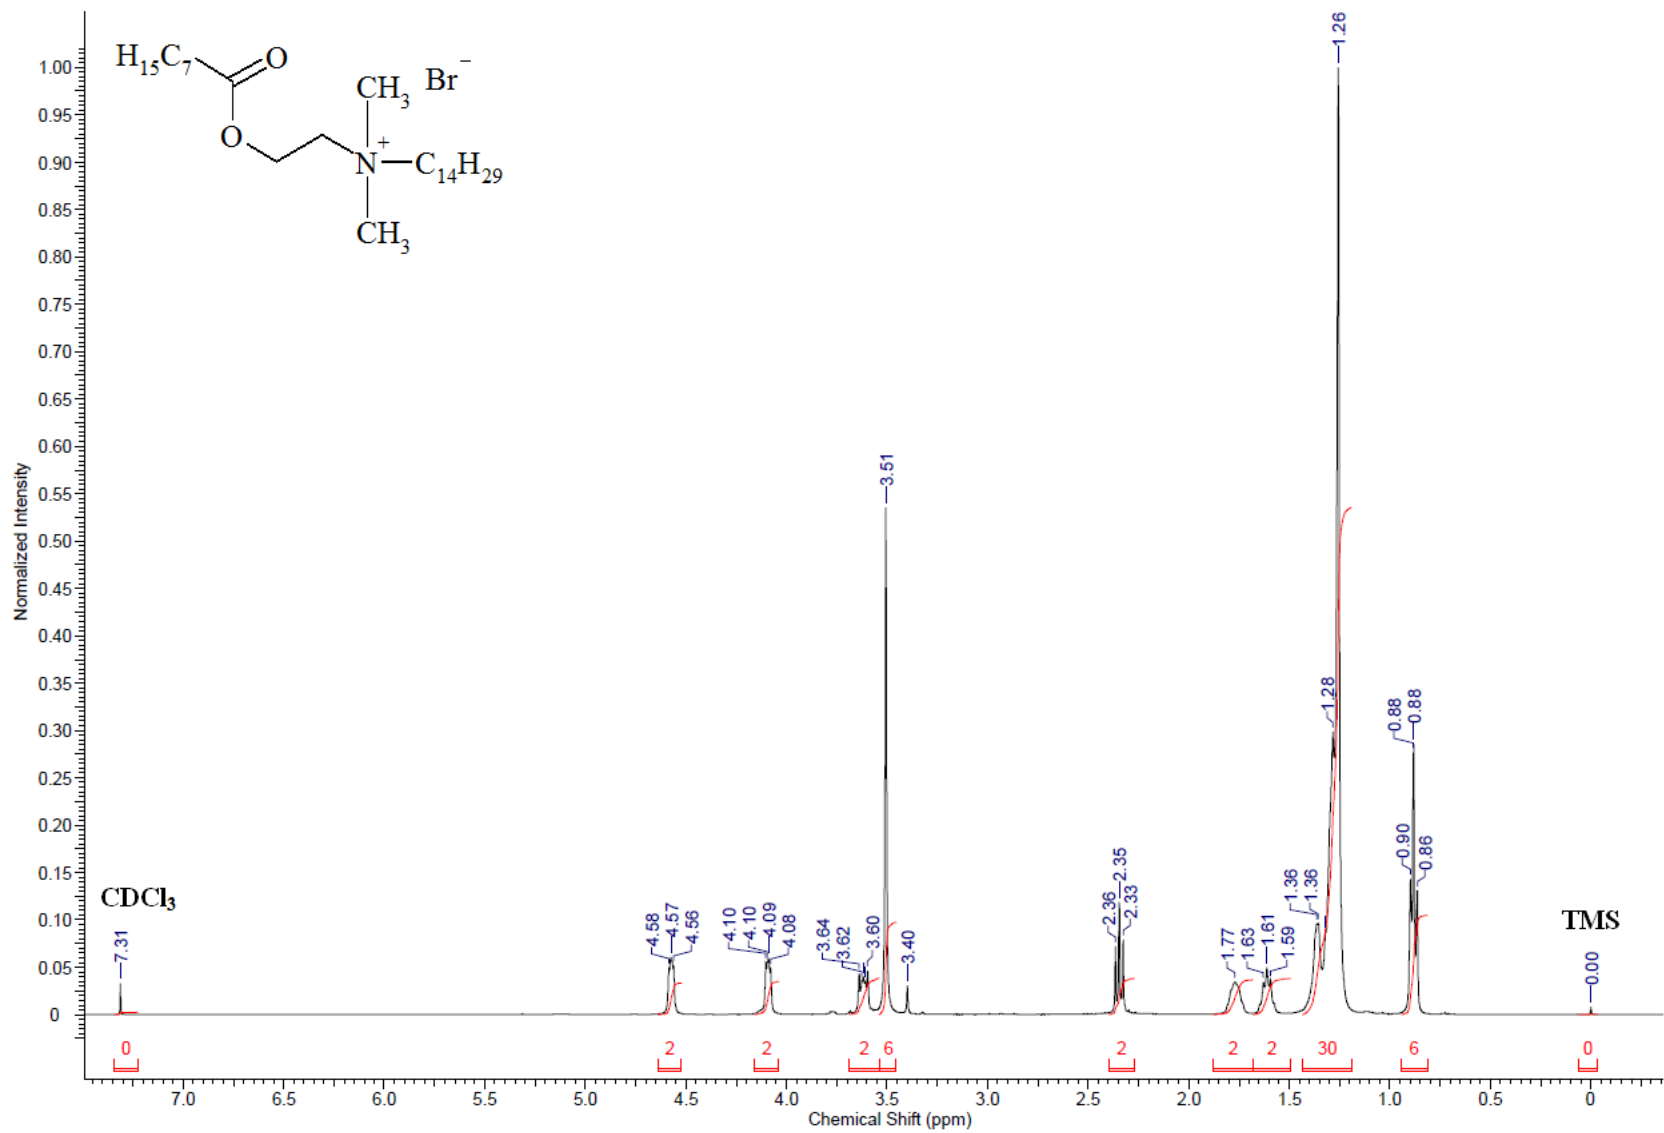

Fig. S29. <sup>1</sup>H NMR spectrum of dimethyl-2-octanoyloxyethyltetradecylammonium bromide (EC14).

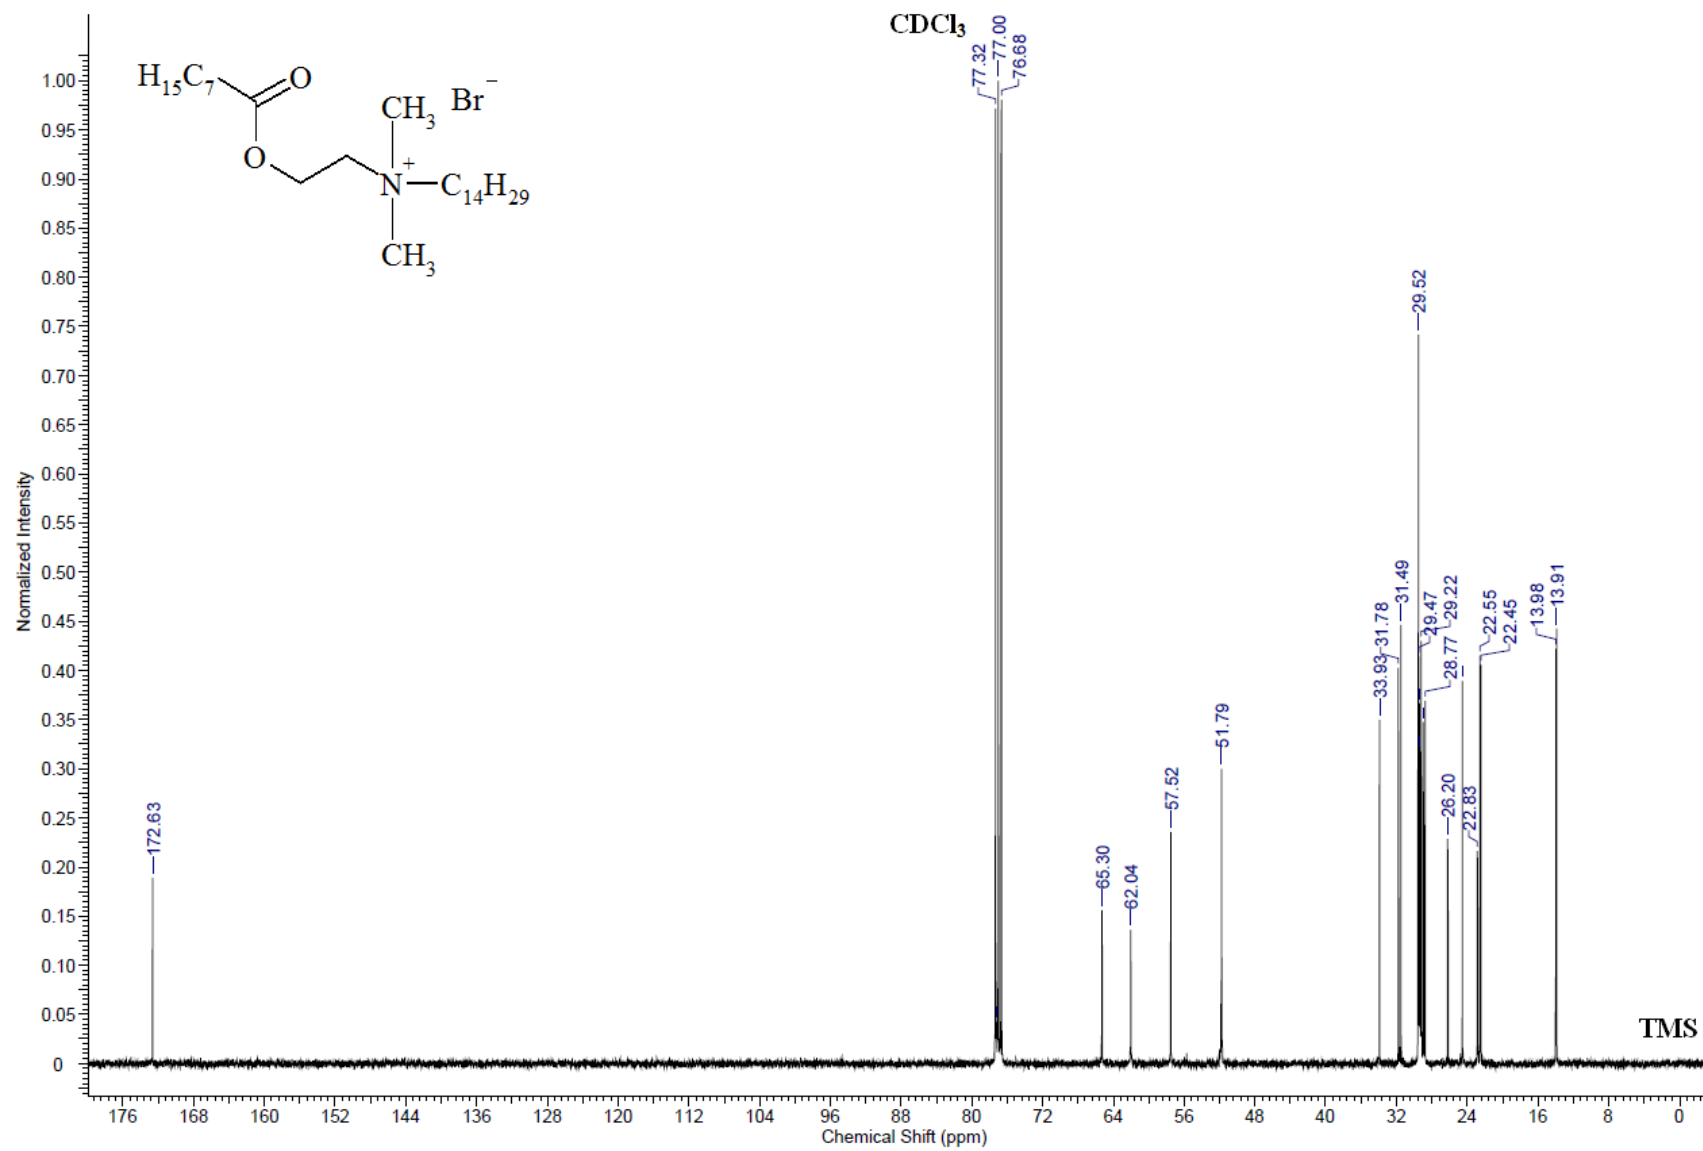

Fig. S30.  $^{13}\text{C}$  NMR spectrum of dimethyl-2-octanoyloxyethyltetradecylammonium bromide (EC14).



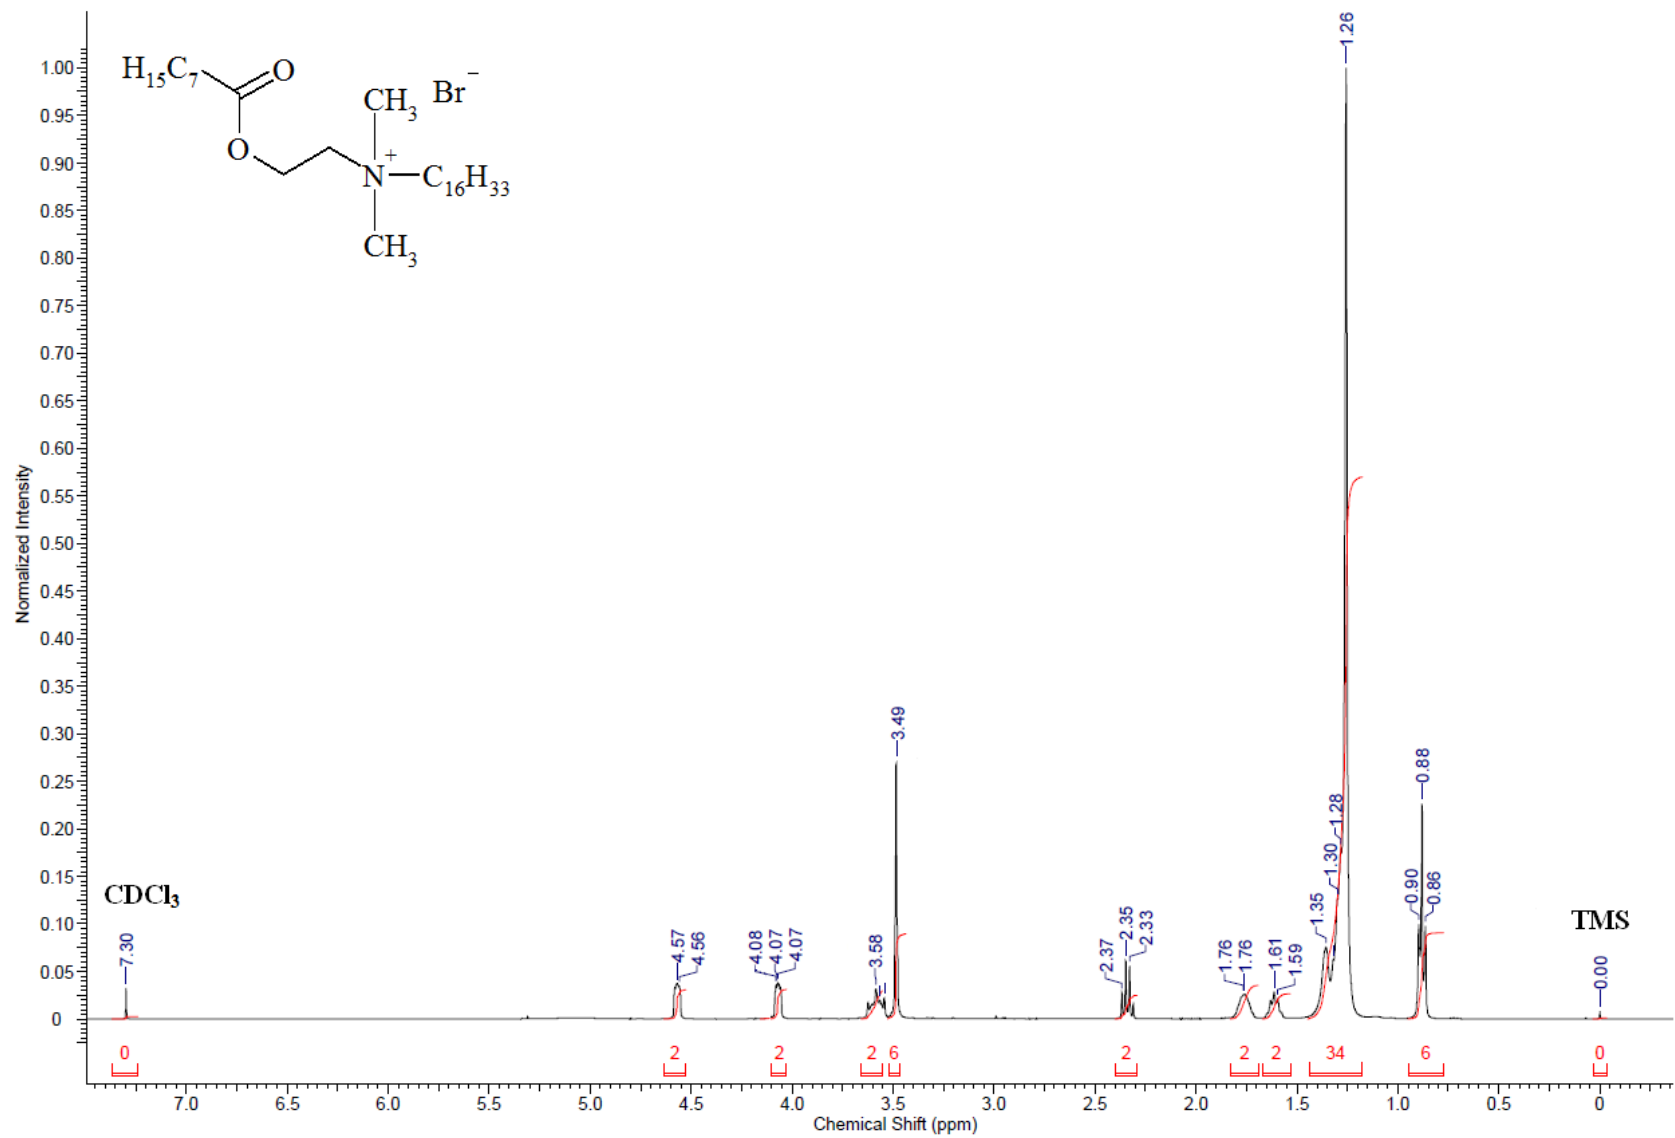

**Fig. S31.** <sup>1</sup>H NMR spectrum of hexadecyldimethyl-2-octanoyloxyethylammonium bromide (**EC16**).

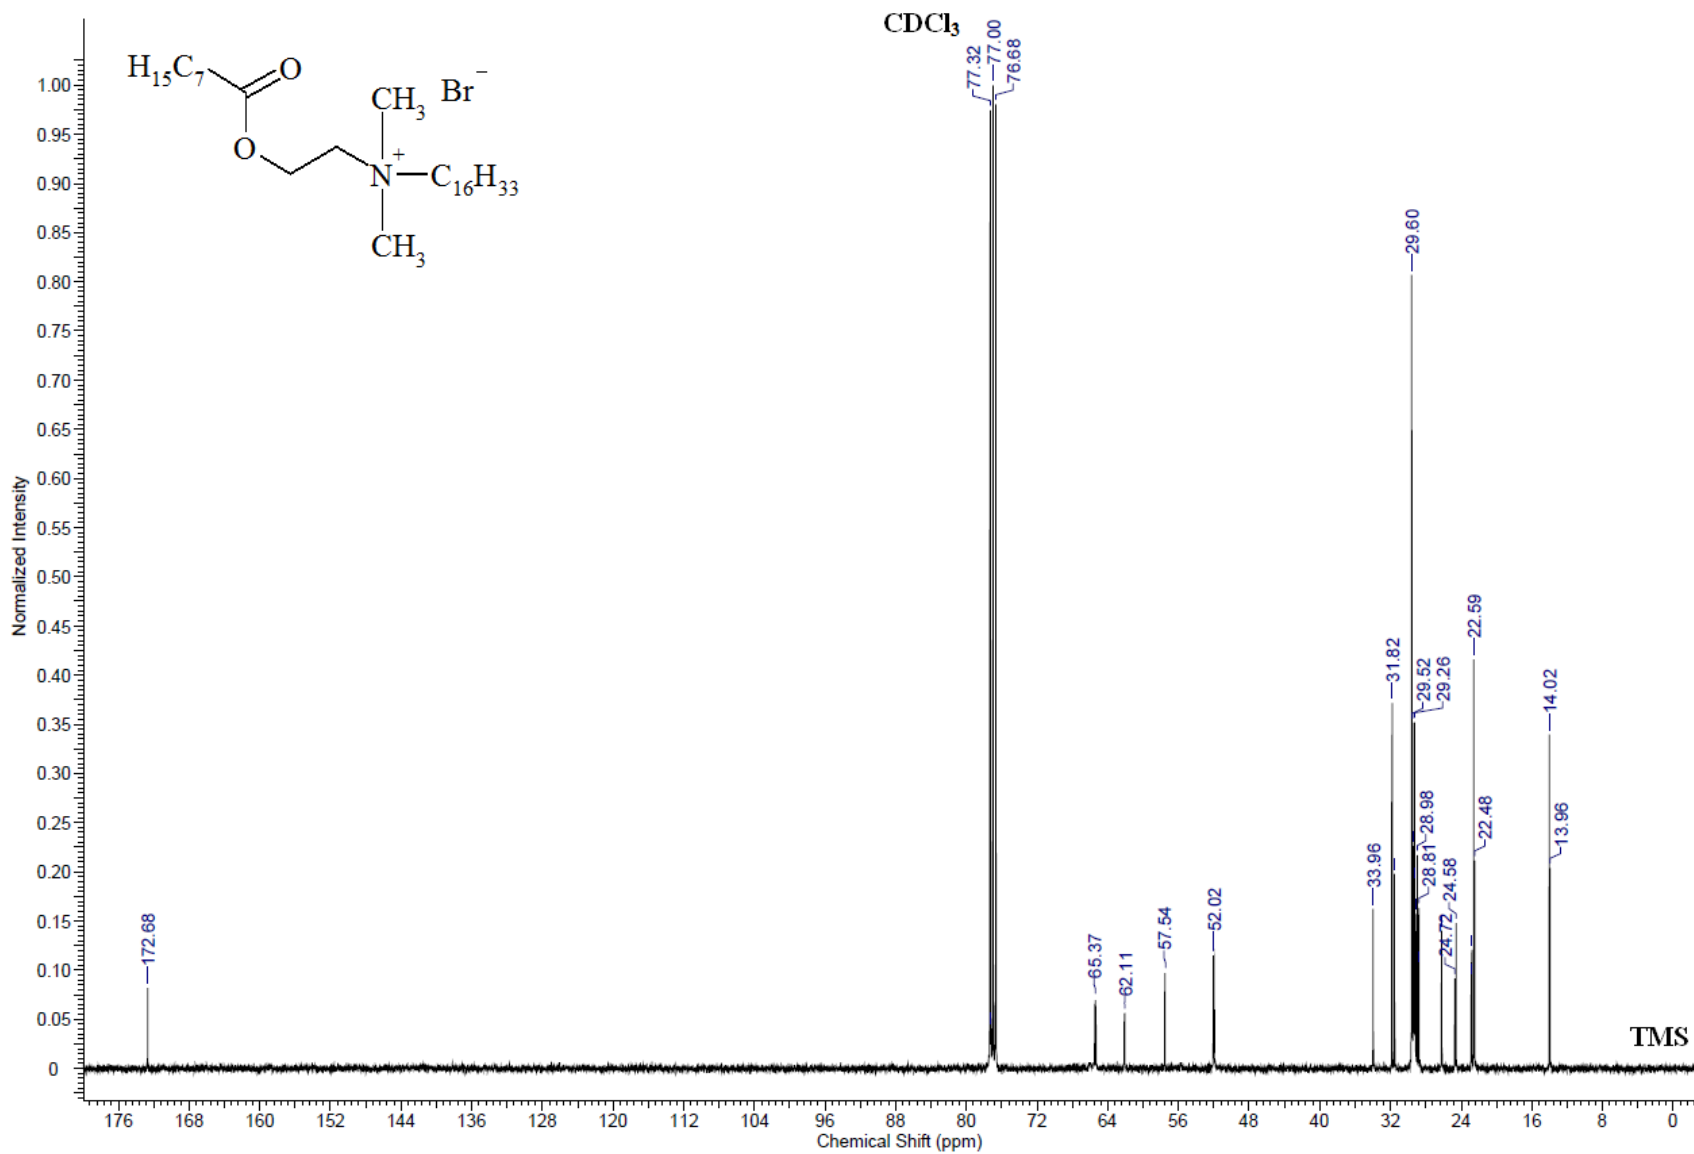

**Fig. S32.**  $^{13}\text{C}$  NMR spectrum of hexadecyldimethyl-2-octanoyloxyethylammonium bromide (EC16).

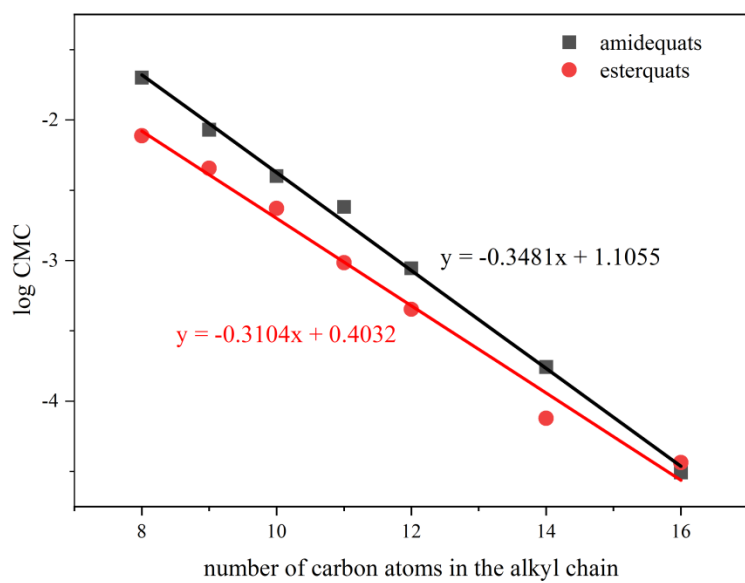

**Fig. S33.** Effect of the elongation of alkyl chain on the CMC of amidequats and esterquats.
